# Supplementary material for: LINC00478-derived novel cytoplasmic lncRNA LacRNA stabilizes PHB2 and suppresses breast cancer metastasis via repressing MYC targets
Source: Springer Nature journal article supplement (doi:10.1186/s12967-023-03967-1), 2023-02-13
Supplement: MOESM1 [file 24022272]

# Additional Figures

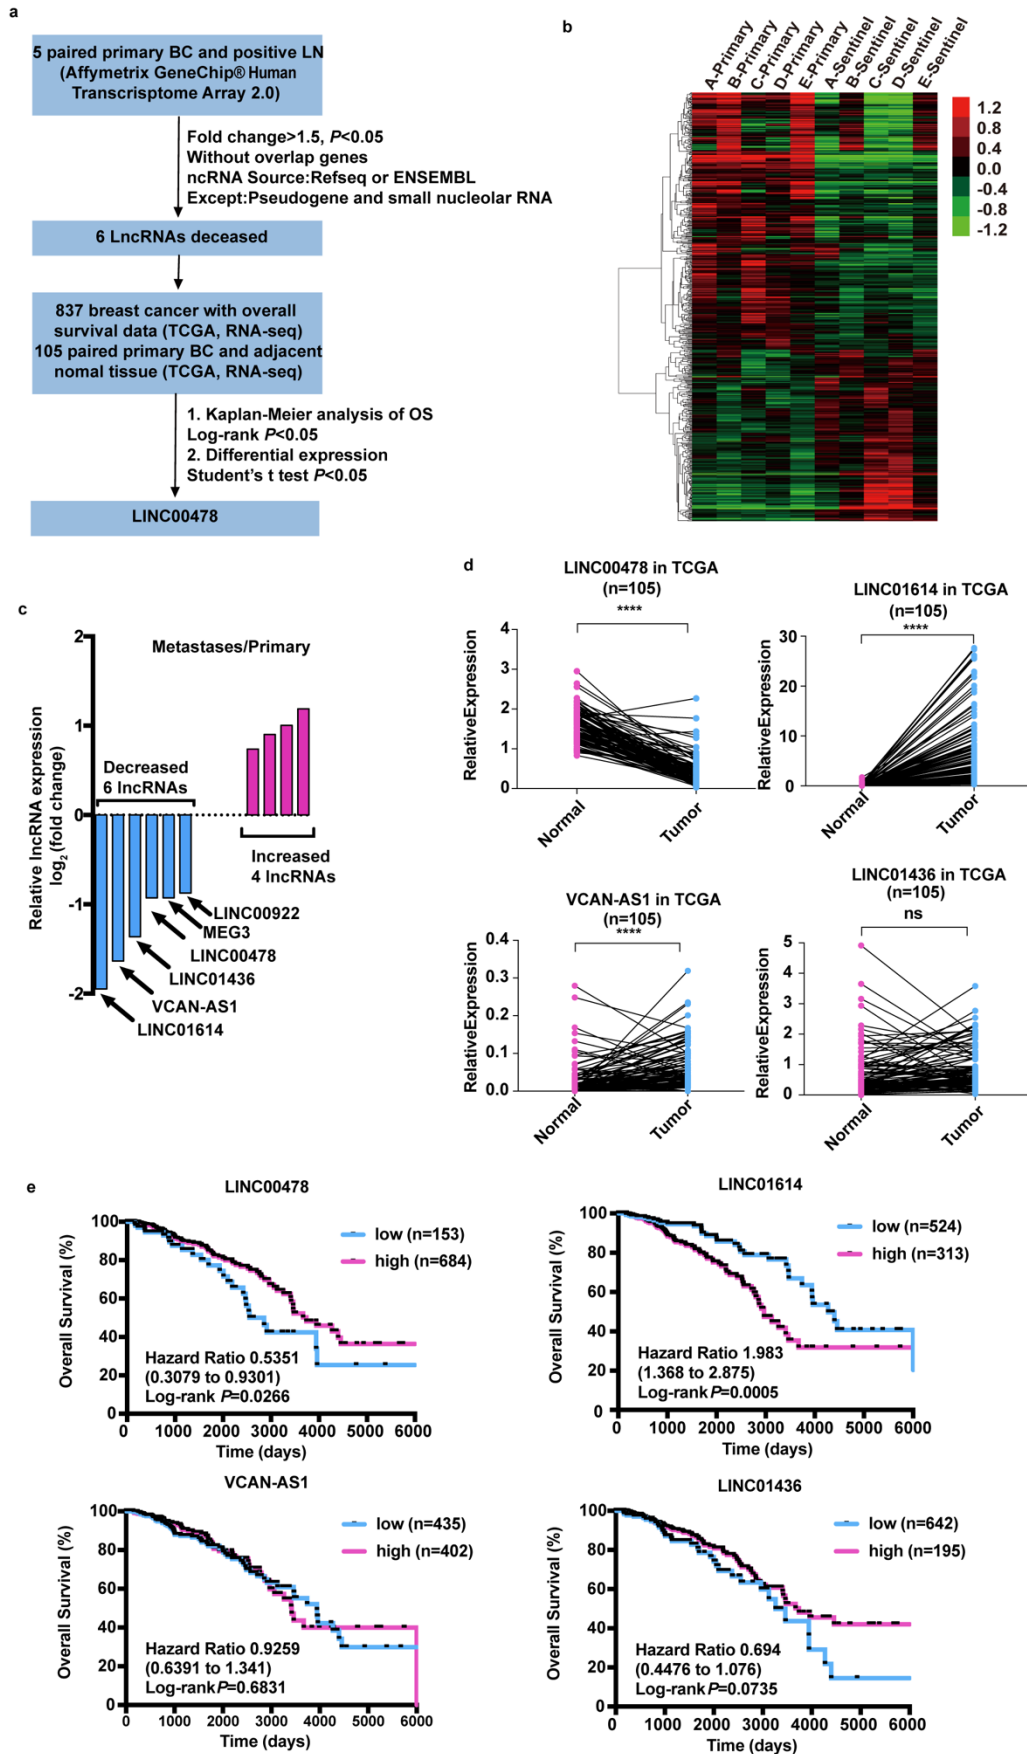

**Figure S1. The screening of lncRNAs associated with breast cancer progress.**

(a) Schematic flow chart for screening lncRNAs associated with breast cancer progression. (b) Heat map of RNA microarray data showing different expression RNA between primary breast tumors and paired axillary lymph node metastatic loci. (c) Microarray data showing the relative expression of candidate lncRNAs differentially expressed in metastatic tissues and primary tumor tissues. (d) TCGA database of LINC00478, LINC01614, VCAN-AS1 and LINC01436 relative expression in 105 paired primary breast cancer and adjacent normal tissues. *P* values were determined by Mann-Whitney test. ns, not significant, \*\*\*\**p*<0.0001. (e) TCGA database of LINC01614, VCAN-AS1 and LINC01436 expression and overall survival in 837 breast cancer patients (Kaplan-Meier log rank test).

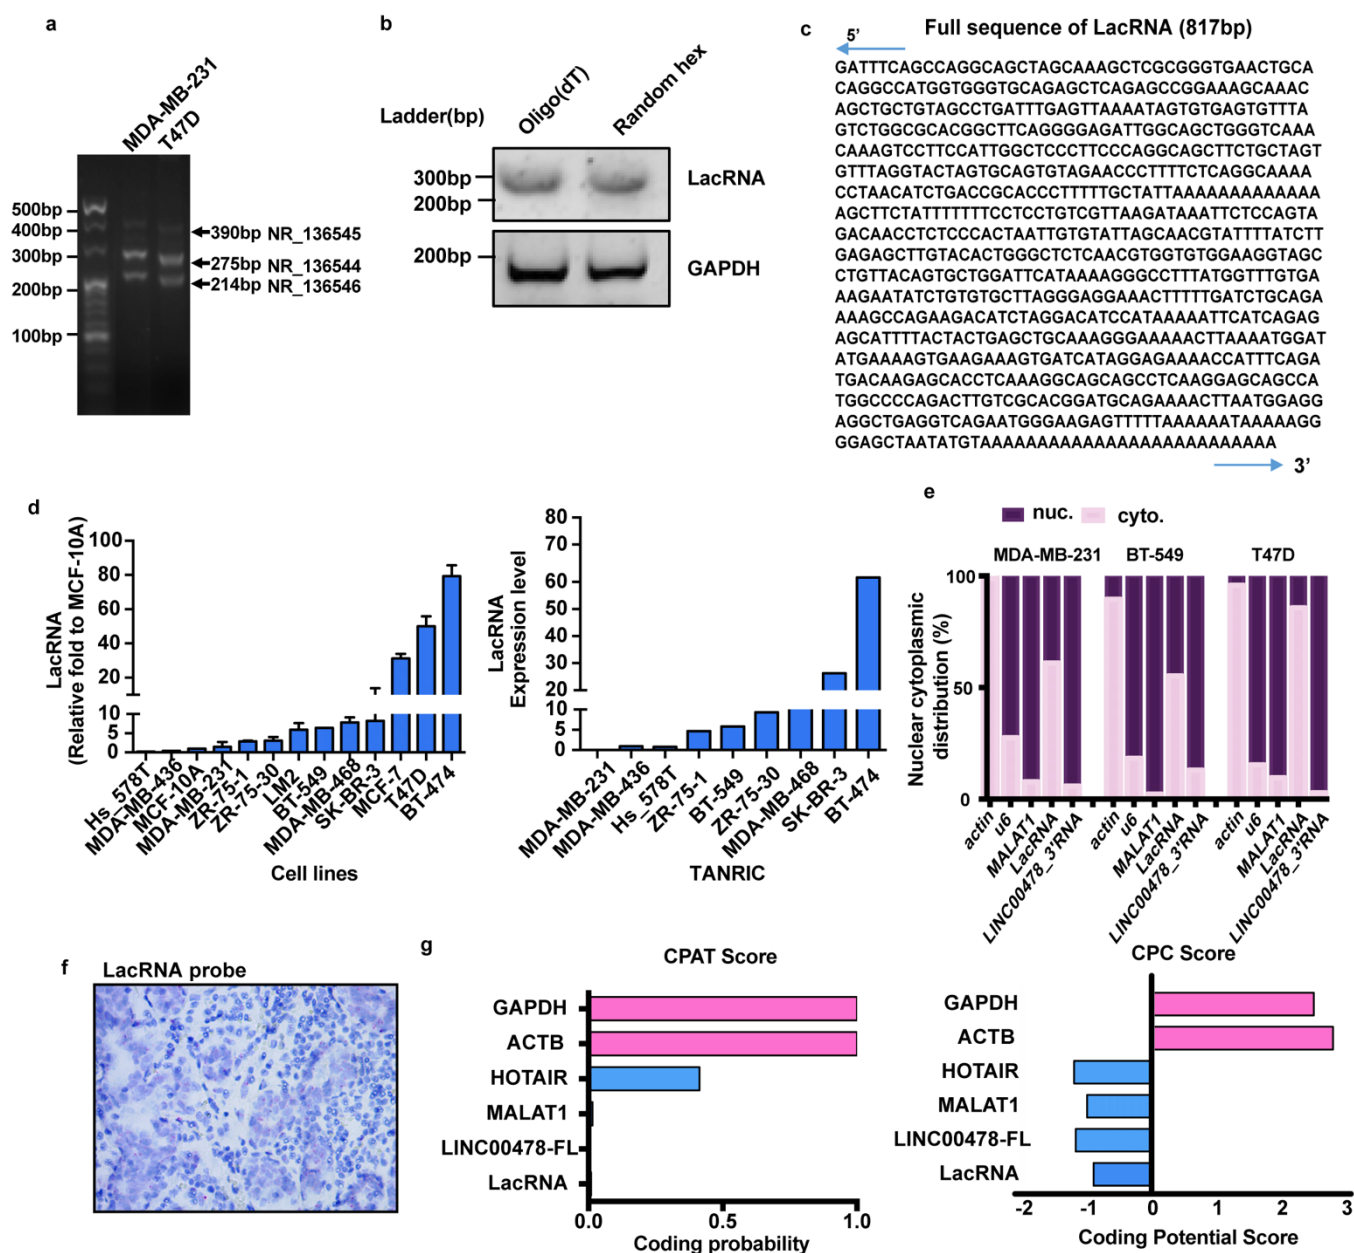

**Figure S2. LacRNA is a small cytoplasm RNA derived from LINC00478 in breast cancer cells.**

(a) The relative expression of isoforms NR\_136544, NR\_136545 and NR\_136546 in MDA-MB-231 and T47D cells according to semi-quantitative PCR amplification of exon 7 and exon 11 junction. (b) RT-PCR experiment using oligo dT or Random primer to reverse-transcribe total cell RNA separately, to confirm the existence of the poly A tail. (c) Sequence of LacRNA cloned from MDA-MB-231 cell cDNA. The sequence identified by RACE assays. (d) The expression level of LacRNA in different breast cancer cell

lines measured by RT-qPCR and TANRIC database separately. **(e)** RT-qPCR of the nuclear and cytoplasmic fractionations of MDA-MB-231, BT549 and T47D cells. Compared with nuclear lncRNA MALAT, cytoplasmic internal reference actin and nuclear internal reference U6. The data shown represent three independent experiments. **(f)** Representative image of RNA scope assay to show the subcellular localization of LacRNA. red, LacRNA RNA. **(g)** The protein coding potential of LINC00478 full length and LacRNA, using Coding Potential Assessment Tool (CPAT, <http://lilab.research.bcm.edu/cpat/>) and Coding Potential Calculator (CPC, <http://cpc.cbi.pku.edu.cn/>). GAPDH and  $\beta$ -actin served as the positive controls of coding genes, and HOTAIR and MALAT1 served as the negative control of non-coding genes.



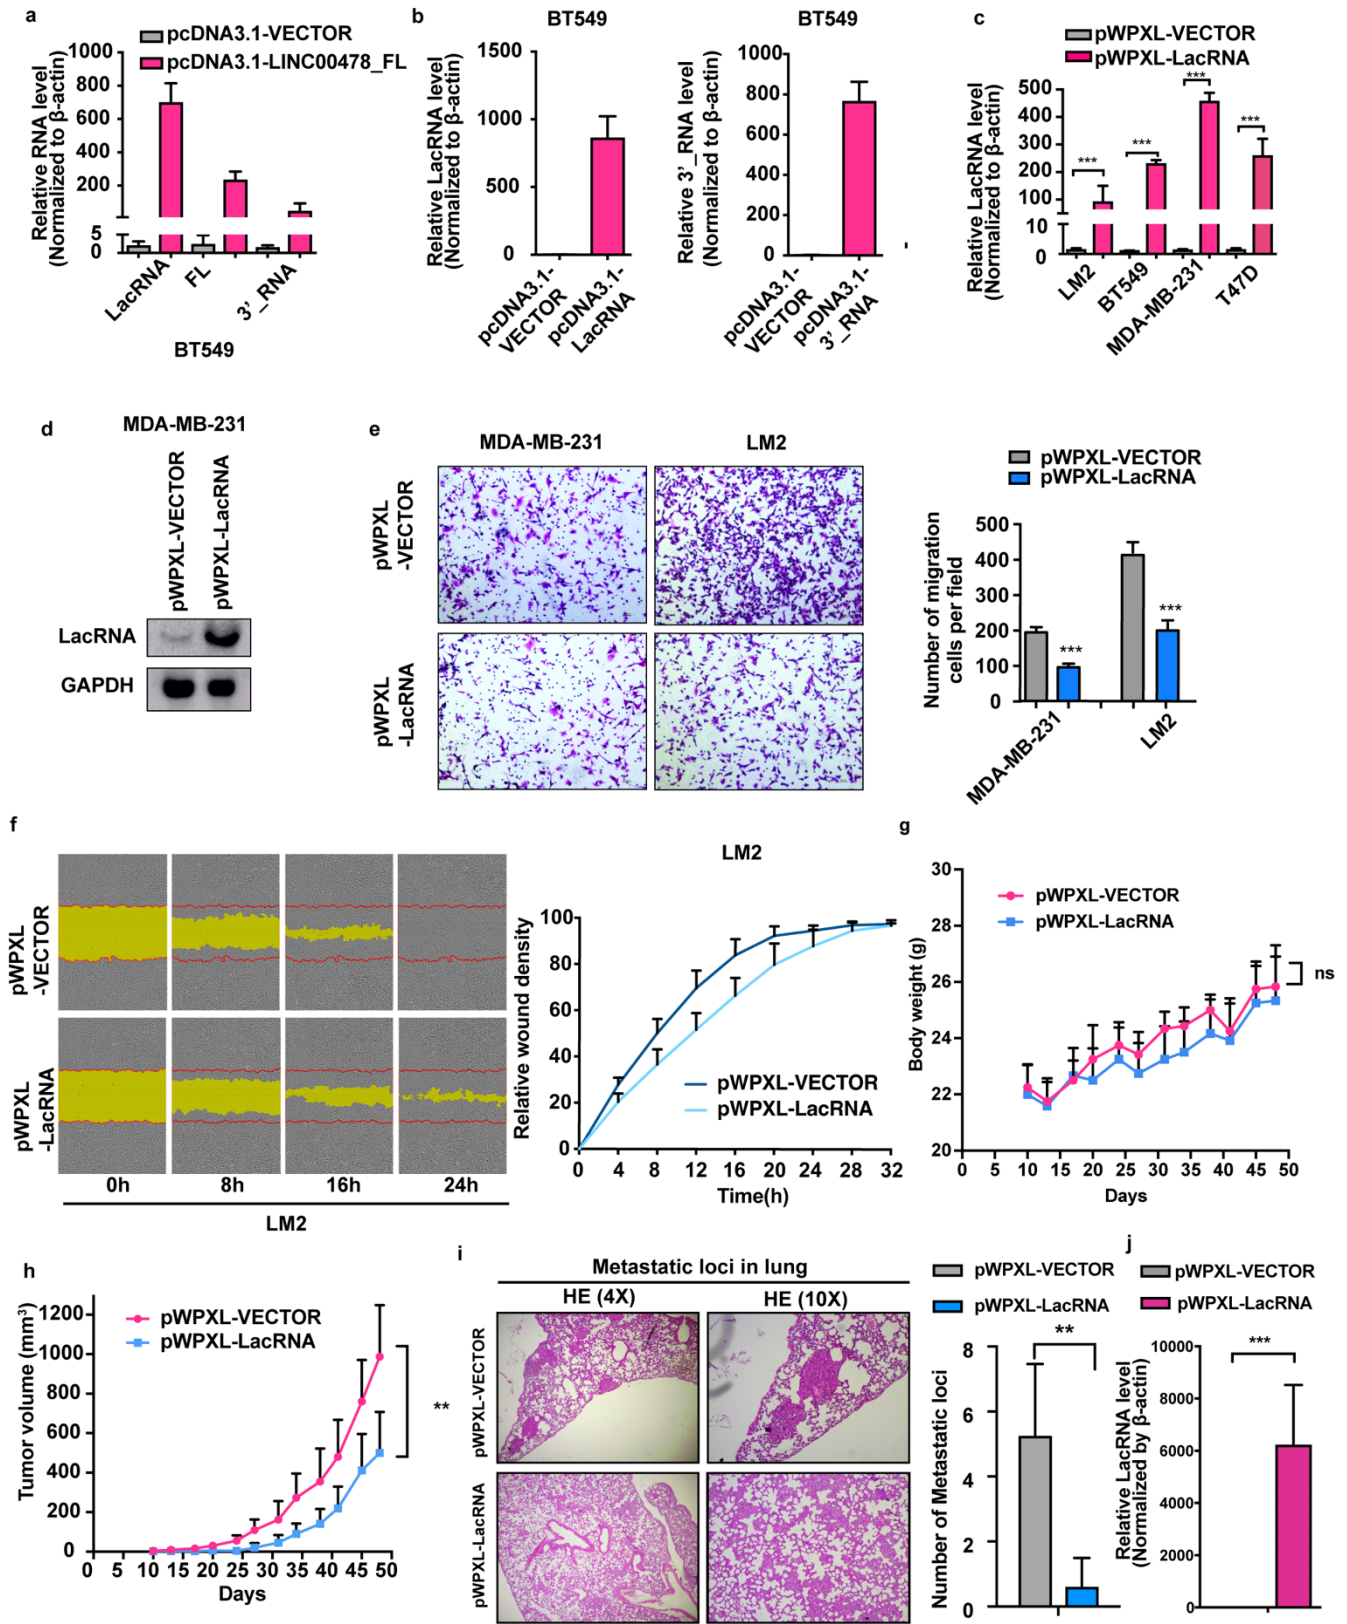

**Figure S3. LacRNA inhibits breast cancer metastasis.**

**(a)** The level of lacRNA, LINC00478 full length and LINC00478\_3'RNA when LINC00478 full length was overexpressed by pcDNA3.1 in BT549 cells. **(b)** The overexpression of LacRNA and LINC00478\_3'RNA by pcDNA3.1 in BT549 cells. **(c)** The overexpression of LacRNA by lentivirus in LM2, BT549, MDA-MB-231 and T47D cell lines. **(d)** Northern-blotting for LacRNA in the pWPXL overexpression MDA-MB-231 cells. **(e)** Transwell migration assay in the MDA-MB-231 and LM2 cells with LacRNA overexpressed by lentivirus. **(f)** Wound healing assay with representative images in stable pWPXL-LacRNA and pWPXL-vector control cells. **(g, h) Body weights and** tumor volumes were measured in the pWPXL-LacRNA and negative control groups in the xenograft mouse models. **(i)** Representative data and statistical analysis of hematoxylin-eosin staining in the tumor foci of the lung samples obtained from NOD/SCID mice after injection with vector pWPXL-LacRNA and control pWPXL-vector LM2 cells, n=6. **(j)** Seven weeks after implantation of orthotopic transplanted tumors in mice, the orthotopic tumors were removed, and the expression level of LacRNA in orthotopic tumor was verified by qPCR. Values are expressed as the Mean  $\pm$  SEM in a-c and e. n=3 independent experiments. *P* values were determined by unpaired Student's *t*-test. ns, not significant, \*\**p*<0.01, \*\*\**p*<0.001.

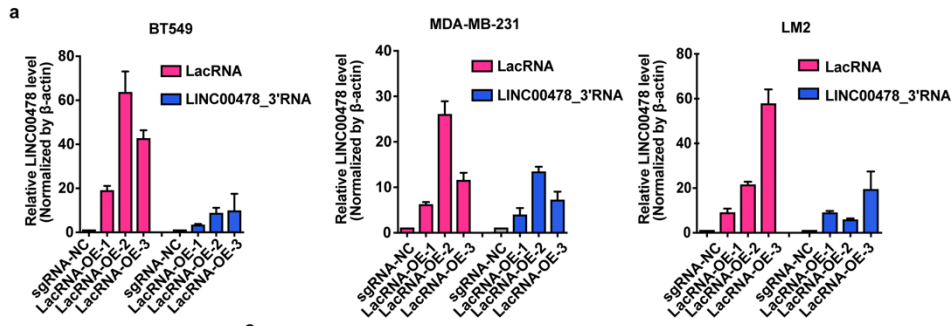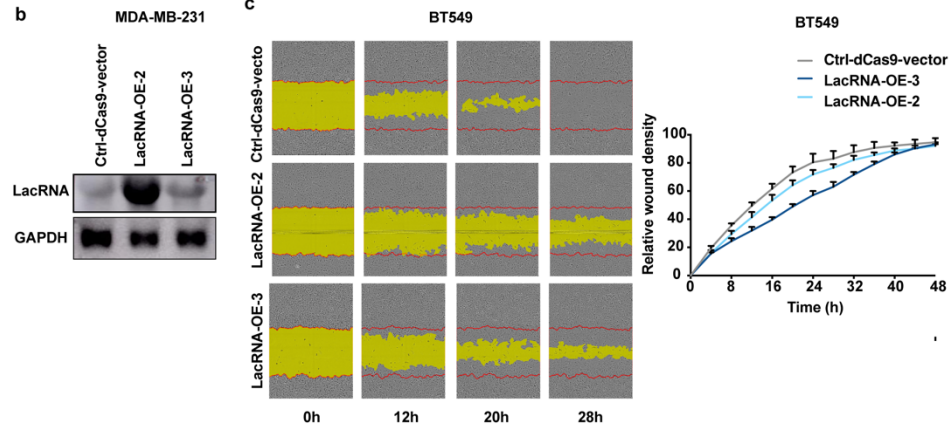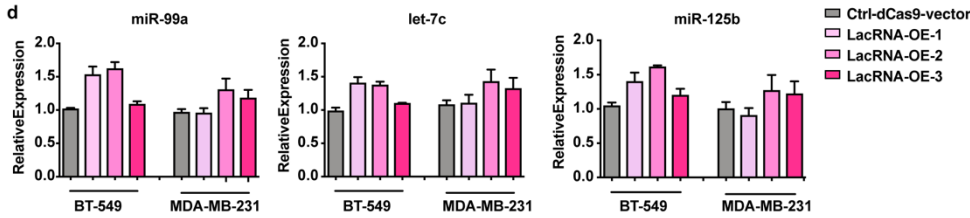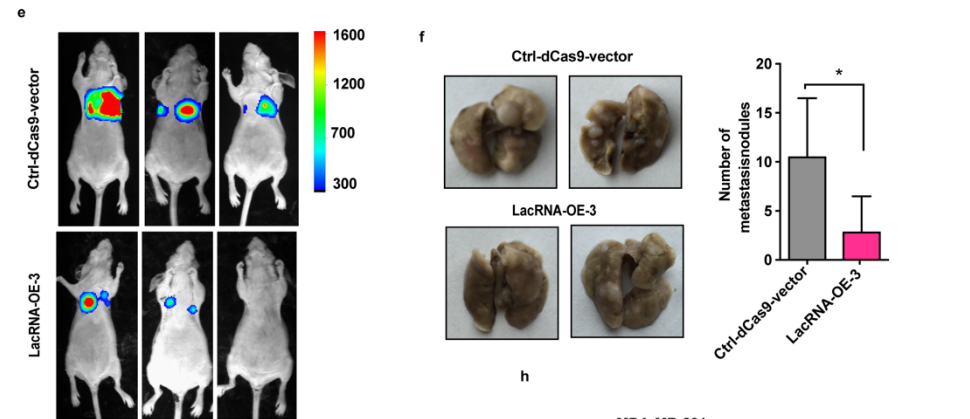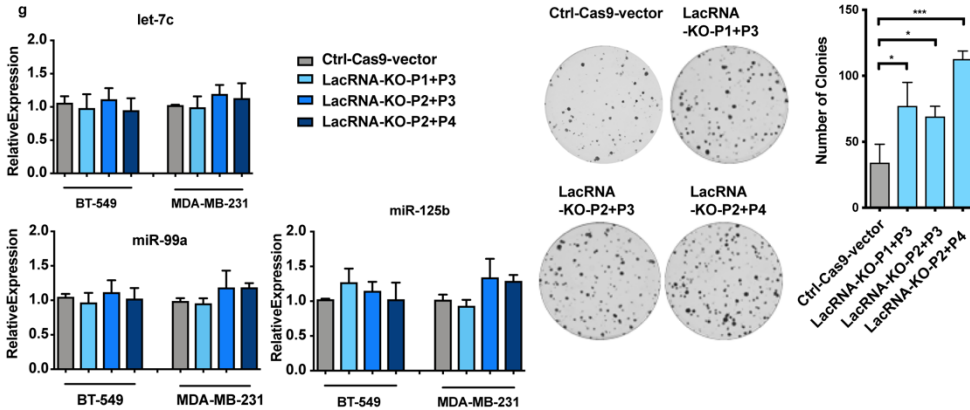

**Figure S4. LacRNA inhibits breast cancer metastasis.**

(a) The activation of LacRNA and 3'RNA by CRISPR-dCas9 technology activation in the BT549, MDA-MB-231 and LM2 cell lines, Mean  $\pm$  SEM; n=3 independent experiments. (b) Northern-blotting for LacRNA in the CRISPR-OE-2 or CRISPR-OE-3 cells, derived from MDA-MB-231 cells. (c) Representative images of wound healing assay in the BT-549 cells with LacRNA activation by the CRISPR/dead-Cas9 technology. (d) The expression of the microRNAs (let-7c, miR125b and miR99a) existed in the introns of LacRNA by qRT-PCR in LacRNA-endogenous- activated BT549 and MDA-MB-231 cells. (e) Representative images from BLI of the lungs of athymic BALB/c nude mice 5 weeks after the indicated cells were injected into the caudal vein, n=6. (f) Representative data and statistical analysis of lung metastasis in the control groups and LacRNA-activated groups. (g) The expression of the microRNAs (let-7c, miR125b and miR99a) existed in the introns of LacRNA by qRT-PCR in LacRNA-endogenous- knockout BT549 and MDA-MB-231 cells. (h) Representative images of colony formation assays in LacRNA-endogenous-knockout MDA-MB-231 cells. Values are expressed as the Mean  $\pm$  SEM; n=3 independent experiments. *P* values were determined by one way analysis of variance (ANOVA). \**p*<0.05, \*\*\**p*<0.001.



**Figure S5. Streptavidin pulldown assay and graphic illustration of predicted LacRNA secondary structure.**

**(a)** A list of the top LacRNA-associated proteins identified by RNA pulldown and MS analysis in MDA-MB-231 cells. **(b)** Schematic view of the predicted secondary structure of LacRNA and truncation-mapping of biotinylated LacRNA motifs as indicated. The red boxes represent the three truncation fragments of LacRNA, with the corresponding number labeled. **(c)** Schematic view of the predicted secondary structure of LacRNA 1-300nt motif and deletion-mapping of biotinylated LacRNA motifs as indicated. The red boxes represent the deleted fragments of LacRNA, with the corresponding number labeled. **(d)** The mass spectrometry identification of 30- kDa LacRNA-binding proteins.

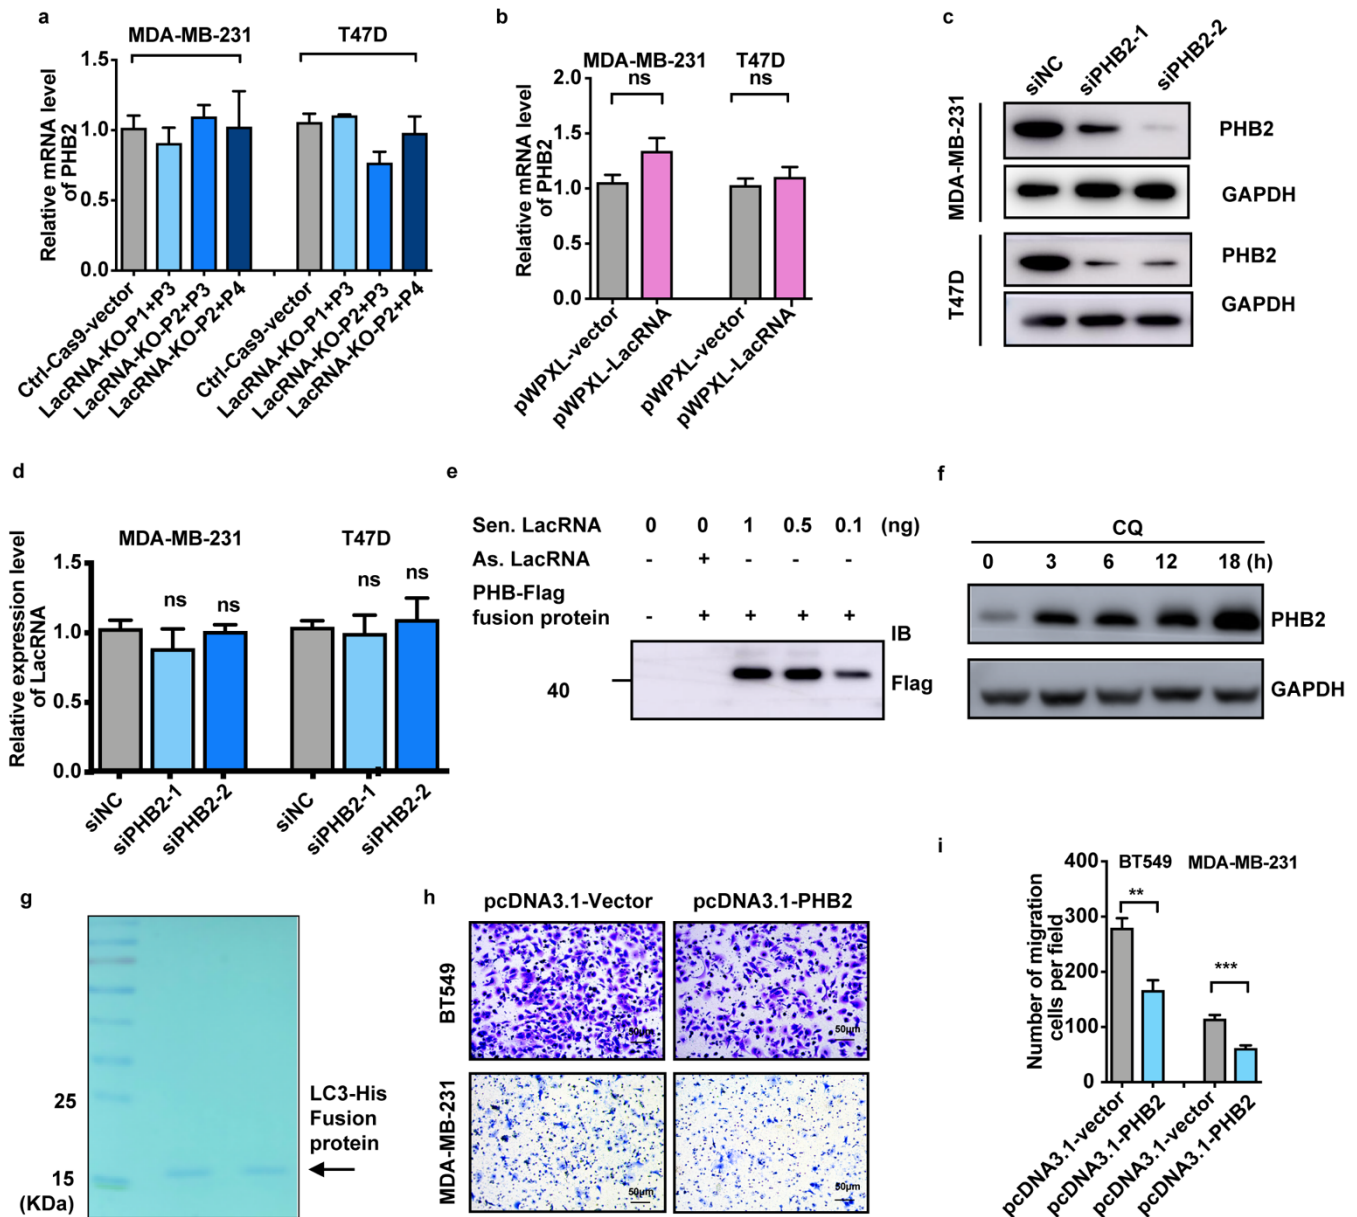

**Figure S6. LacRNA physically interacts with PHB2 in breast cancer cells.**

(a, b) The mRNA level of PHB2 was quantified by RT-qPCR in MDA-MB-231 and T47D cells with LacRNA knockout (a) or overexpression (b), Mean  $\pm$  SEM; n=3 independent experiments. (c) Immunoblotting of the efficiencies of two independent siRNAs for PHB2 in MDA-MB-231 and T47D cells. (d) The expression level of LacRNA was quantified by RT-qPCR in MDA-MB-231 and T47D cells with PHB2 knockdown. (e) Immunoblotting of PHB2 in pull-down samples by different density biotinylated-LacRNA. (f) Immunoblotting for PHB2 levels in the breast cancer cells treated with autophagy inhibitors chloroquine (CQ) for indicated times. (g) Exogenous synthetic LC3-His protein. (h)

Representative images of transwell migration assays for BT-549 and MDA-MB-231 cells overexpressing PHB2. **(i)** Quantitative images of transwell migration assays of BT-549 and MDA-MB-231 cells with PHB2 overexpressed.



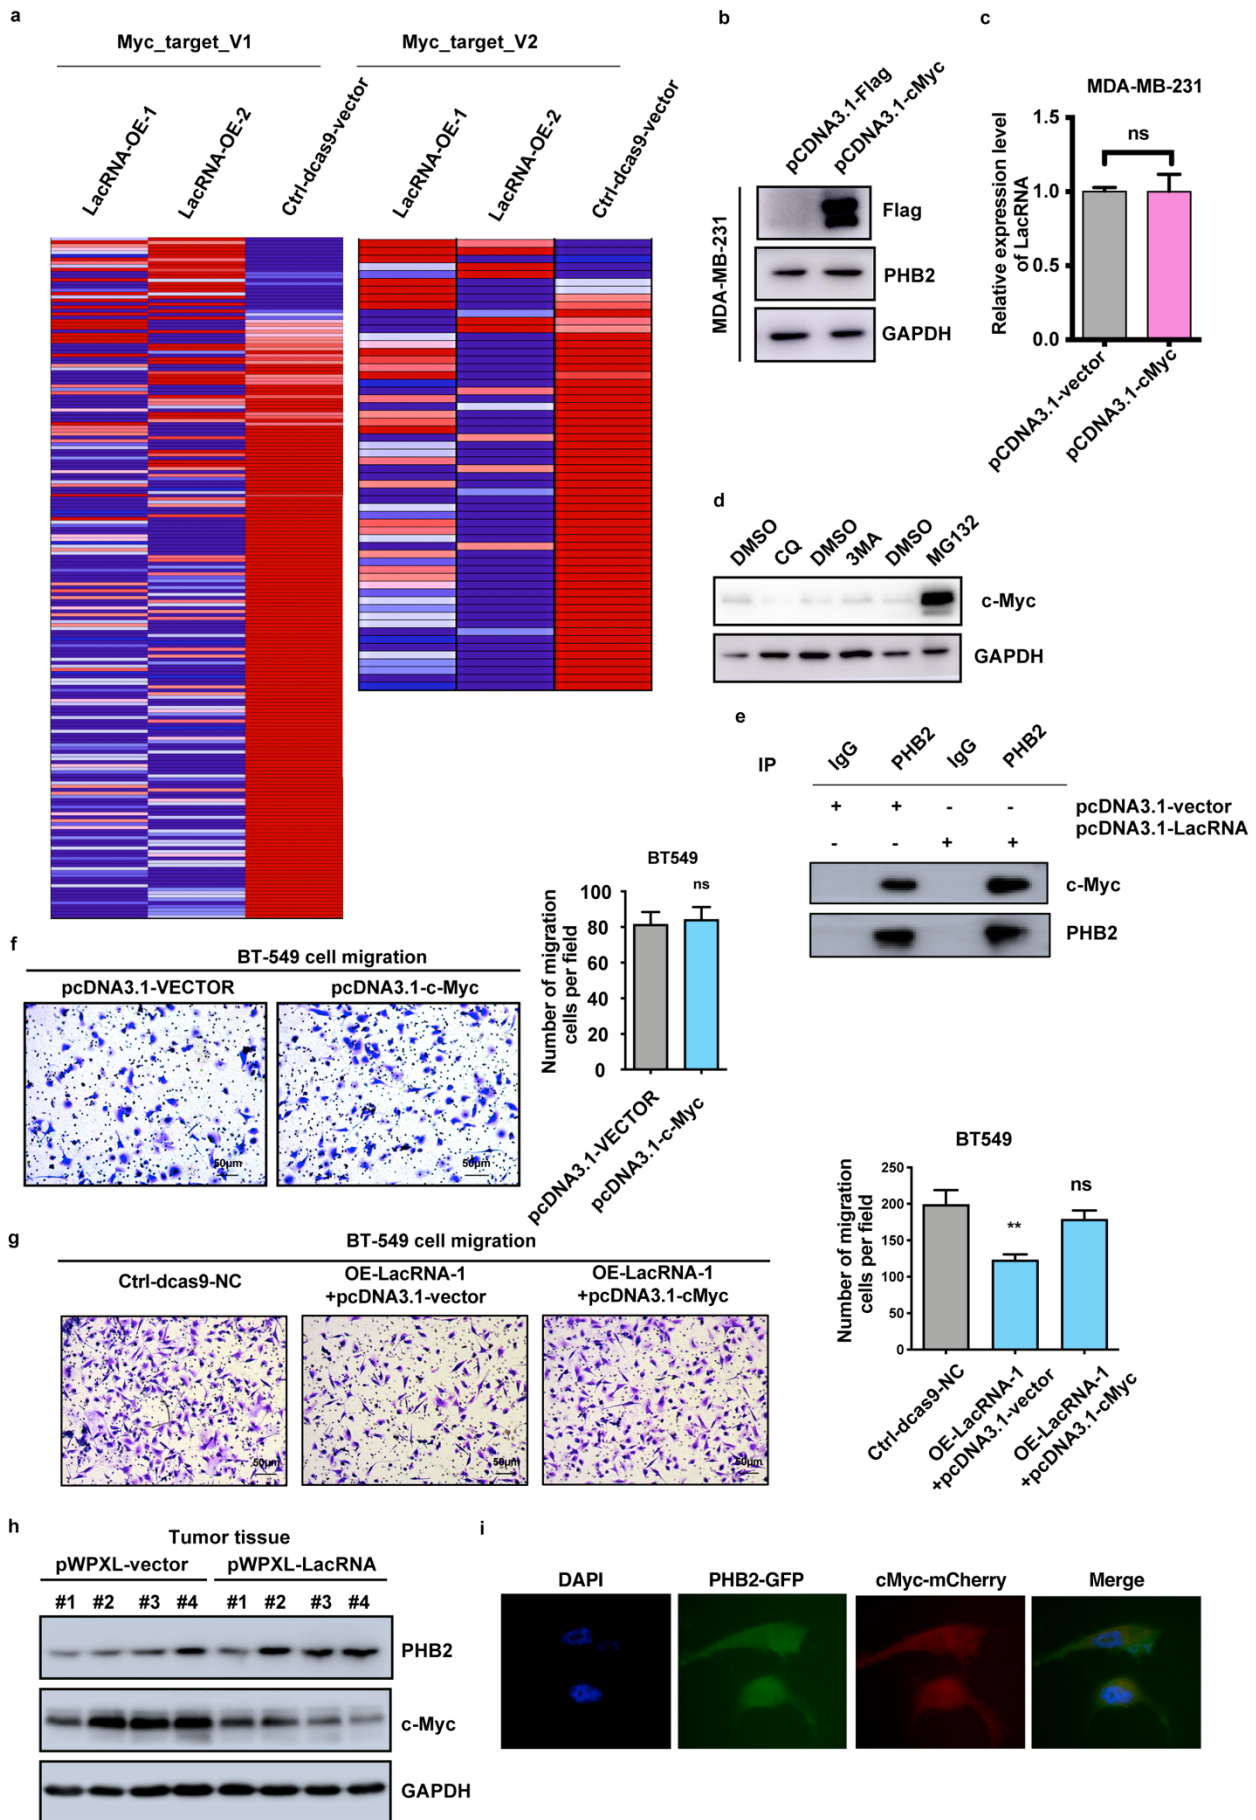

**Figure S7. The LacRNA-PHB2 complex is a negative regulator of MYC signaling.**

(a) Heat map of RNA-sequencing data after LacRNA activation showing different expression of MYC targets genes in GSEA MYC target gene set v1 and v2. (b) Immunoblotting for the protein levels of PHB2 and c-Myc after c-Myc overexpressed. GAPDH served as the internal control. (c) The expression level of LacRNA was quantified by RT-qPCR in MDA-MB-231 cells with c-Myc overexpressed. (d) Immunoblotting for the protein levels of c-Myc in MDA-MB-231 cells with the proteasome inhibitor MG132 and autophagy inhibitors chloroquine (CQ) and 3-methyladenine (3MA) treated. (e) Co-immunoprecipitation of c-Myc and PHB2 with or without the LacRNA overexpressed. (f) Representative images and quantitative of transwell migration assay in the BT-549 cells with c-Myc overexpressed, Mean  $\pm$  SEM; n=3 independent experiments. ns, not significant. (g) Representative images and quantitative of the transwell migration rescue assays in LacRNA activated BT549 cells with additional c-Myc overexpressed, Mean  $\pm$  SEM; n=3 independent experiments. ns, not significant, \*\* $p$ <0.01. (h) Immunoblotting of the expression of PHB2 and c-Myc in orthotopic transplanted tumors in mice. (i) Confocal microscopy imaging of co-immunostaining of PHB2-GFP (green), c-Myc-mCherry (red) and merged with DAPI (blue) in MDA-MB-231 cell overexpressing PHB2-GFP and c-Myc-mCherry.

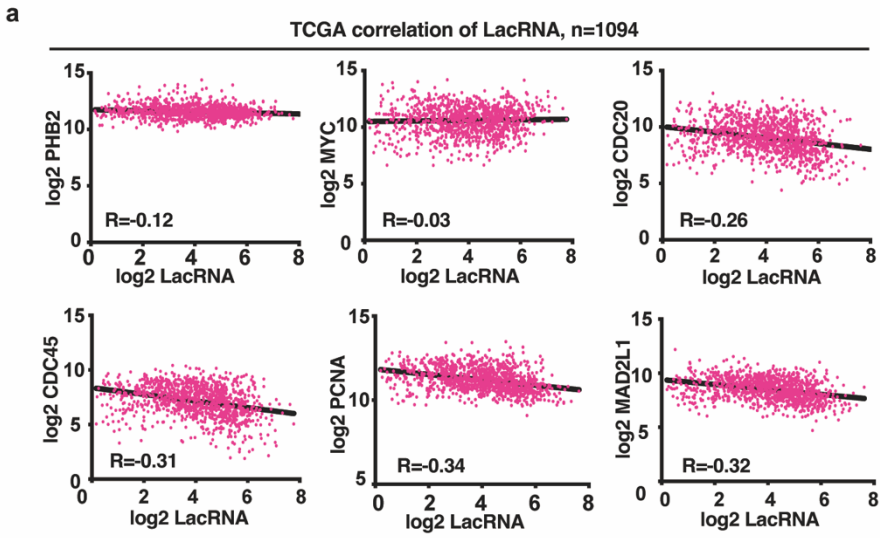

**Figure S8.** The correlation of LacRNA and PHB2, c-Myc and its downstream pathways in RNA-seq data for 1,094 breast cancer patients from the TCGA database. linear regression analysis.

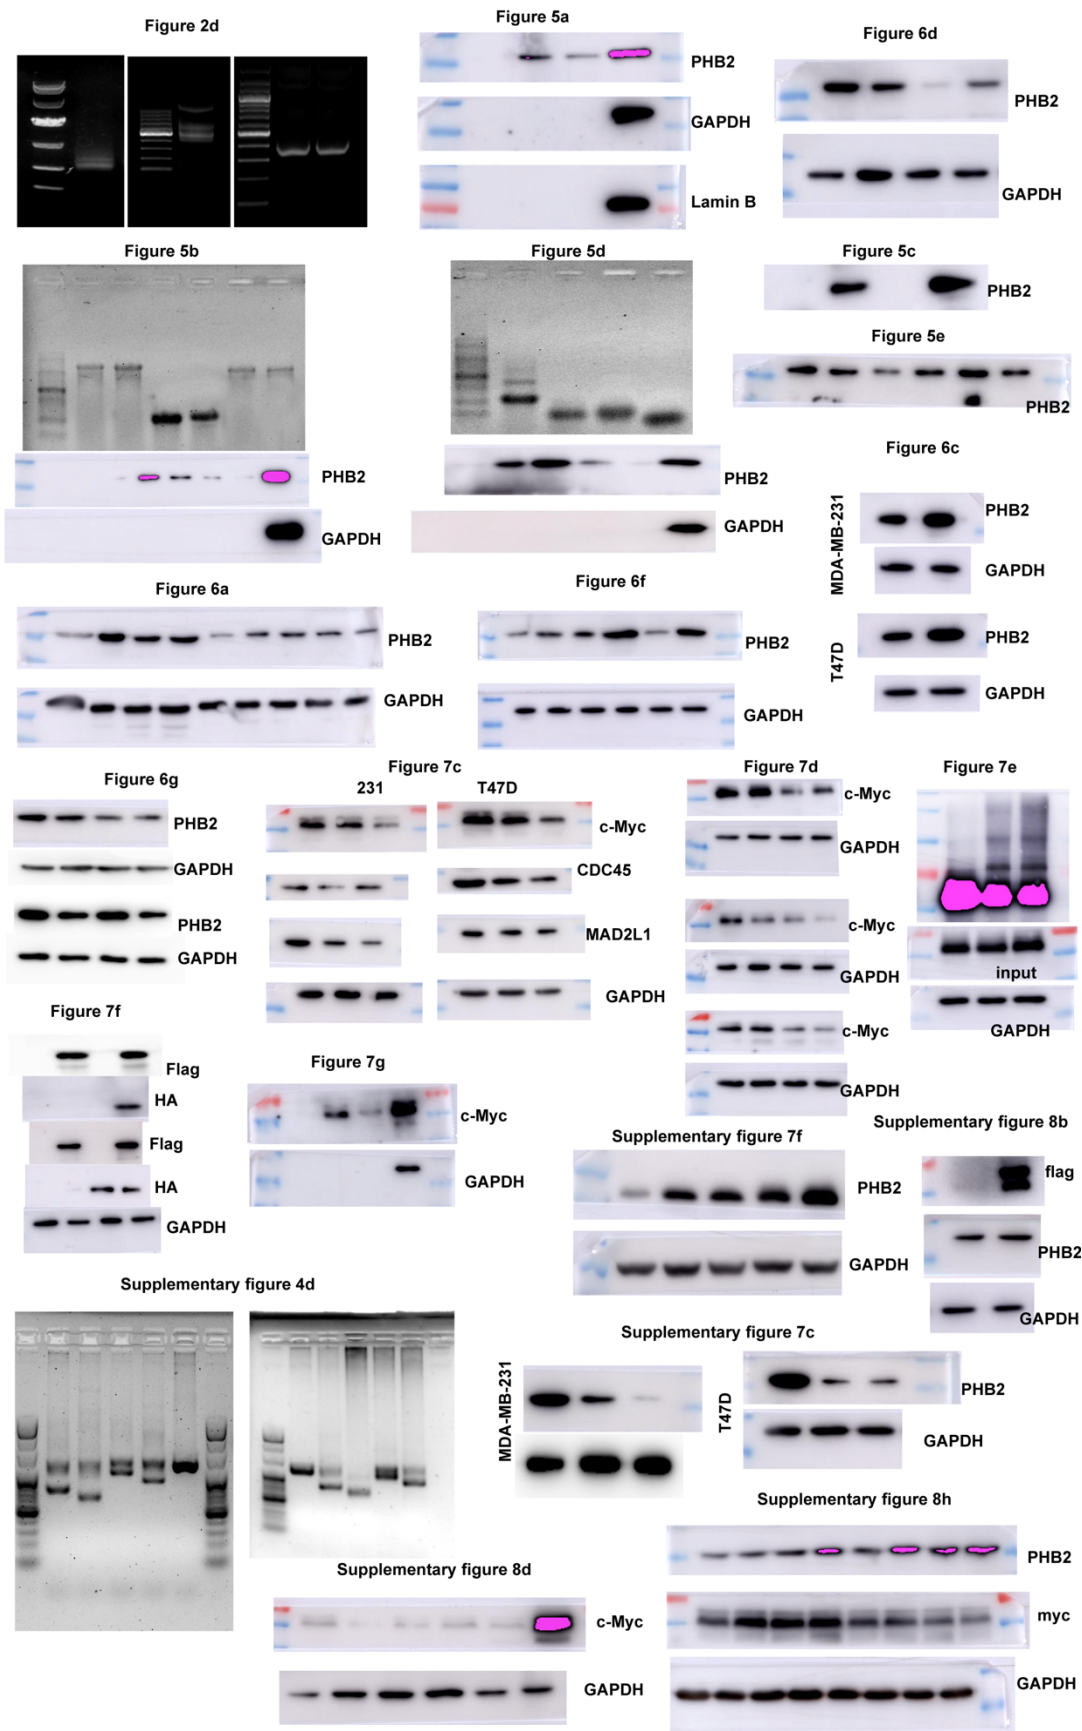

Figure S9. The uncropped original scans of blots.

## Additional Tables

**Table S1: Long non-coding RNAs differentially expressed in primary BC and positive lymph node.**

| LincRNA ID      | LncRNA    | Description                                 | Chromosome<br>Cytoband | Start~ End          | Strand | log2 Fold<br>change | P_value   | style |
|-----------------|-----------|---------------------------------------------|------------------------|---------------------|--------|---------------------|-----------|-------|
| ENSG00000230838 | LINC01614 | long intergenic non-protein coding RNA 1614 | chr2<br>q35            | 216582766~216584147 | +      | 1.9468742           | 0.0024375 | down  |
| ENSG00000249835 | VCAN-AS1  | VCAN antisense RNA 1 (non-protein coding)   | chr5<br>q14.3          | 82837296~82877139   | -      | 1.634395            | 0.0007848 | down  |
| ENSG00000231106 | LINC01436 | long intergenic non-protein coding RNA 1436 | chr21<br>q22.12        | 37377636~37379899   | +      | 1.363169            | 0.0148049 | down  |
| ENSG00000215386 | LINC00478 | long intergenic non-protein coding RNA 478  | chr21<br>q21.1         | 17442842~17982094   | +      | 0.9276386           | 0.044495  | down  |
| ENSG00000214548 | MEG3      | maternally expressed 3 (non-protein coding) | chr14<br>q32           | 101245747~101327368 | +      | 0.9266954           | 0.0072912 | down  |
| ENSG00000261742 | LINC00922 | long intergenic non-protein coding RNA 922  | chr16<br>q21           | 65318402~65610203   | -      | 0.6800536           | 0.0087496 | down  |
| ENSG00000247982 | LINC00926 | long intergenic non-protein coding RNA 926  | chr15<br>q21.3         | 57592563~57599967   | +      | -0.7379656          | 0.043048  | up    |
| ENST00000427859 | CHRM3-AS2 | CHRM3 antisense RNA 2 (non-protein coding)  | chr1<br>q43            | 239867192~239882419 | -      | -0.9022458          | 0.0412862 | up    |
| ENST00000499452 | LINC02273 | long intergenic non-protein coding RNA 2273 | chr4<br>q31.3          | 153021906~153025872 | +      | -1.0046252          | 0.0361784 | up    |
| ENSG00000256039 | LINC02446 | long intergenic non-protein coding RNA 2446 | chr12<br>p13.2         | 10705962~10710648   | +      | -1.1876758          | 0.0428353 | up    |

**Table S2: Sequences for the primers, PCR, sgRNAs and shRNA.**

| Primer name or Sequences of PCR, sgRNAs and shRNA primers | Sequence (5'→3')                                                | Application                       |
|-----------------------------------------------------------|-----------------------------------------------------------------|-----------------------------------|
| groupA-F (AF)                                             | AAGGCCCAACCAGTTCTTCA TC                                         | qPCR analysis                     |
| groupA-R (AR)                                             | TTTCTGCA TCCGTGCGACAA                                           | qPCR analysis                     |
| groupB-F (BF)                                             | ACTGAAATGGAACAGGGGCA                                            | qPCR analysis                     |
| groupB-R (BR)                                             | AGTTTTCTGCATCCGTGCGA                                            | qPCR analysis                     |
| groupC-F (CF)                                             | TACTACTGGGCTCTCAACGTG                                           | qPCR analysis                     |
| groupC-R (CR)                                             | AAGTTTTCTGCATCCGTGCG                                            | qPCR analysis                     |
| NR_136544-45-F                                            | TCTGTGTGCTTAGGGAGGAAAC                                          | qPCR analysis                     |
| NR_136544-45-R                                            | CTGAAATGGTTTTCTCCTATGATCACT                                     | qPCR analysis                     |
| NR_136545-F                                               | TCTGTGTGCTTAGGGAGGAAAC                                          | qPCR analysis                     |
| NR_136545-R                                               | TGTTGACTCATGGCCTAGGGAAA                                         | qPCR analysis                     |
| semi-quantitative rt-PCR TSS5-F                           | TGGGCTCTCAACGTGGTGTGGAAGGTAG                                    | semi-quantitative rt-PCR analysis |
| semi-quantitative rt-PCR TSS5-R                           | GGCTGCTGCCTTTGAGGTGCTCTTGT                                      | semi-quantitative rt-PCR analysis |
| LINC00478-5' RACE                                         | GGCTGCTGCCTTTGAGGTGCTCTTGT                                      | 5'RACE                            |
| LINC00478-3' RACE-1                                       | GAGAGCTTGTACACTGGGCTCTCAACGTGG                                  | 3'RACE                            |
| LINC00478-3' RACE-2                                       | GTGGAACACCAGCCAAGTCCTGGGC                                       | 3'RACE                            |
| pWPXL-LINC00478-F-BamHI                                   | TTAAACTACGGGATCCGATTTTCAGCCAGGCAGCTAG                           | PCR for vector construction       |
| pWPXL-LINC00478-R-MluI                                    | TAGCGCTAGGACGCGTTTTTCTGTTATTTCTTCTTTATTTCTA                     | PCR for vector construction       |
| pWPXL-LacRNA-R-MluI-1                                     | TAGCGCTAGGACGCGTCTCTTCCATTCTGACCTCAGCC                          | PCR for vector construction       |
| pWPXL-LacRNA-R-MluI-2                                     | TAGCGCTAGGACGCGTACATATTAGCTCCCCTTTTTATTTTTTAAAAACTCTCC CA TTCTG | PCR for vector construction       |
| pWPXL-LINC00478_3'RNA-F-BamHI                             | TTAAACTACGGGATCCGCTAATATGTGAGGAACTGATTGCTG                      | PCR for vector construction       |
| pcDNA3.1-LINC00478-F-NotI                                 | AAGGAAAAAAGCGGCCGCGATTTTCAGCCAGGCAGCTAG                         | PCR for vector construction       |
| pcDNA3.1-LINC00478-R-BamHI                                | TTAAACTACGGGATCCTTTTCTGTTATTTCTTCTTTATTTCTA                     | PCR for vector construction       |
| pcDNA3.1- LacRNA-R-BamHI                                  | TTAAACTACGGGATCCCATATTAGCTCCCCTTTTTATTTTTTAAAAACTC              | PCR for vector construction       |
| pcDNA3.1- LINC00478_3'RNA -F- NotI                        | AAGGAAAAAAGCGGCCGCGAGCTAATATGTGAGGAACTG                         | PCR for vector construction       |
| LacRNA-Northern Probe-F                                   | AACATCTGACCGCACCCCTTT                                           | Northern Blotting                 |
| LacRNA-Northern Probe-R                                   | GATCACTAATACGACTCACTATAGGGCTTTGCAGCTCAGTAGTAAAATGCTC            | Northern Blotting                 |
| LINC00478_3'RNA-Northern-F                                | CCAACCATGCCTGCTAGTGA                                            | Northern Blotting                 |
| LINC00478_3'RNA-Northern-R                                | GATCACTAATACGACTCACTATAGGGGGCTTCACATAGGTTGGGCT                  | Northern Blotting                 |
| LacRNA-sgRNA-1                                            | AACAGTCCAGATTTACCATG                                            | CRISPR/Cas9 and CRISPR/dead-Cas9  |
| LacRNA-sgRNA-2                                            | TAGCTCAACAAATCCCAACC                                            | CRISPR/Cas9 and CRISPR/dead-Cas9  |

|                                   |                                                             |                                  |
|-----------------------------------|-------------------------------------------------------------|----------------------------------|
| LacRNA-sgRNA-3                    | TCTGATTTTTGCAAAGCTCG                                        | CRISPR/Cas9 and CRISPR/dead-Cas9 |
| LacRNA-sgRNA-4                    | TGAACTGCACAGGCCATGGT                                        | CRISPR/Cas9 and CRISPR/dead-Cas9 |
| LINC00478-FL-sense-Pulldown-F     | TAATACGACTCACTATAGGGAGAGATTTTCAGCCAGGCAGCTAG                | <i>In vitro</i> transcription    |
| LINC00478-FL-sense-Pulldown-R     | TTTTCTGTTATTTCTTCTTTATTCTA                                  | <i>In vitro</i> transcription    |
| LINC00478-FL-antisense-Pulldown-F | TAATACGACTCACTATAGGGAGATTTTCTGTTATTTCTTCTTTATTCTATTTTTATTCT | <i>In vitro</i> transcription    |
| LINC00478-FL-antisense-Pulldown-R | GGATCCGATTTTCAGCCAGGCAGCTAG                                 | <i>In vitro</i> transcription    |
| LacRNA-sense-Pulldown-R           | ACATATTAGCTCCCCTTTTAT                                       | <i>In vitro</i> transcription    |
| LacRNA-antisense-Pulldown-F       | AATACGACTCACTATAGGGAGAACATATTAGCTCCCCTTTTAT                 | <i>In vitro</i> transcription    |
| LacRNA-#1-Pulldown-R              | CTTTTTTTTTTTTTAATAGCAAAAAGGGTGCG                            | <i>In vitro</i> transcription    |
| LacRNA-#2-Pulldown-F              | TAATACGACTCACTATAGGGAGAGCTTCTATTTTTTTCCTCCTG                | <i>In vitro</i> transcription    |
| LacRNA-#2-Pulldown-R              | TAAAGTTTTTCCCTTTCAGCTCAGTAG                                 | <i>In vitro</i> transcription    |
| LacRNA-#3-Pulldown-F              | TAATACGACTCACTATAGGGAGAATGGATATGAAAAGTGAAGAAAG              | <i>In vitro</i> transcription    |
| LacRNA-Δ1-Pulldown-R              | GGTCTCCCTATAGTGAGTCGTATTAATTTTCG                            | <i>In vitro</i> transcription    |
| LacRNA-Δ1-Pulldown-F              | GAGCTCAGAGCCGAAAGCAAACAG                                    | <i>In vitro</i> transcription    |
| LacRNA-Δ2-Pulldown-R              | TGCACCCACCATGGCCTGTGCAGTTC                                  | <i>In vitro</i> transcription    |
| LacRNA-Δ2-Pulldown-F              | TTCAGGGGAGATTGGCAGCTGGGTC                                   | <i>In vitro</i> transcription    |
| LacRNA-Δ3-Pulldown-R              | GCCGTGCGCCAGACTAAACTCAC                                     | <i>In vitro</i> transcription    |
| LacRNA-Δ3-Pulldown-F              | GCTTCTGCTAGTGTTAGGTACTAGTGCAGTGT                            | <i>In vitro</i> transcription    |
| LacRNA-Δ4-Pulldown-R              | TGCCTGGGAAGGGAGCCAATGGAAG                                   | <i>In vitro</i> transcription    |
| LacRNA-Δ4-Pulldown-F              | GCTTCTATTTTTTTCCTCCTGTCGTTAAGA                              | <i>In vitro</i> transcription    |
| PHB2-FL-F-HindIII                 | CCCAAGCTTATGGCCAGAAGTTGAAGGACT                              | PCR for vector construction      |
| PHB2-FL-R-KpnI                    | CGGGGTACCTTTCTTACCCTTGATGAGGCTGTCCAC                        | PCR for vector construction      |
| PHB2-N201-R-KpnI                  | CGGGGTACCTTGTTGGCTTCTACAGCAGCTG                             | PCR for vector construction      |
| PHB2-ΔN39-F- HindIII              | CCCAAGCTTATGTCTGTGTTACCGTGGAAGGCG                           | PCR for vector construction      |
| PHB2-N39-R-KpnI                   | CGGGGTACCGTAGGCCACGGCGCCGCCCCAGCAACA                        | PCR for vector construction      |
| PHB2-ΔN188-F- HindIII             | CCCAAGCTTATGAGCTTTAGCCGAGAGTACACAG                          | PCR for vector construction      |
| hsa-miR-125b-5p-F                 | TCCCTGAGACCCTAAGTTGTGA                                      | qPCR analysis                    |
| hsa-miR-99a-5p-F                  | AACCCGTAGATCCGATCTTGTG                                      | qPCR analysis                    |
| hsa-let7c-F                       | TGAGGTAGTAGGTTGTATGGTT                                      | qPCR analysis                    |
| c-Myc-CDS-F-HindIII               | CCCAAGCTTATGCCCCCAACGTTAGCTTCAC                             | PCR for vector construction      |
| c-Myc-CDS-R-KpnI                  | CGGGGTACCCGCACAAGAGTTCCGTAGCTGTT                            | PCR for vector construction      |
| c-Myc-CDS-F-EcoRI                 | CCGGAATTCATGCCCTCAACGTTAGCTTCAC                             | PCR for vector construction      |
| c-Myc-RT-F                        | AATGAAAAGGCCCCCAAGGTAG                                      | qPCR analysis                    |
| c-Myc-RT-R                        | GTCGTTTCCGCAACAAGTCCT                                       | qPCR analysis                    |
| CCNA2-RT-F                        | TGATGTTGGGCAACTCTGCG                                        | qPCR analysis                    |

|               |                        |                 |
|---------------|------------------------|-----------------|
| CCNA2-RT-R    | GTGCAACCCGTCTCGTCT     | qPCR analysis   |
| CDC20-RT-F    | CGCTATATCCCCCATCGCAG   | qPCR analysis   |
| CDC20-RT-R    | CTGATAACCCTCTGGCGCAT   | qPCR analysis   |
| CDC45-RT-F    | GTGATTTGGCGGGAGTCTTG   | qPCR analysis   |
| CDC45-RT-R    | CGAAGAGAAGGACCCTCTGG   | qPCR analysis   |
| MAD2L1-RT-F   | CGTGGCCGAGTTCTTCTCATT  | qPCR analysis   |
| MAD2L1-RT-R   | TACAAGCAAGGTGAGTCCGT   | qPCR analysis   |
| APEX1-RT-F    | TGAAGCCTTTCGCAAGTTCCT  | qPCR analysis   |
| APEX1-RT-R    | ATGTGCCACATTGAGGTCTCC  | qPCR analysis   |
| POLB2-RT-F    | CCACCCGCCTCATCCAAAT    | qPCR analysis   |
| POLB2-RT-R    | CCAAGACCAGCTCGTCATCTG  | qPCR analysis   |
| PCNA-RT-F     | ACACTAAGGGCCGAAGATAACG | qPCR analysis   |
| PCNA-RT-R     | ACAGCATCTCCAATATGGCTGA | qPCR analysis   |
| CDKN1A-RT-F   | GTCACTGTCTTGTACCCTTGTG | qPCR analysis   |
| CDKN1A-RT-R   | GGGCTTCCTCTTGGAGAAGAT  | qPCR analysis   |
| RAN-RT-F      | ATGTAGCCACCTTGGGTGTTG  | qPCR analysis   |
| RAN-RT-R      | GGGGATGTTTTACACACTCG   | qPCR analysis   |
| CCT2-RT-F     | GAACGCCTAGCTCTTGTCAACA | qPCR analysis   |
| CCT2-RT-R     | GCACCACGCAAAACAATGGTA  | qPCR analysis   |
| VBP1-RT-F     | AGTCCACCAACTCAATGGAGA  | qPCR analysis   |
| VBP1-RT-R     | CAAGCATTACATTAGCCCCCAA | qPCR analysis   |
| PSMA7-RT-F    | ACCGCCGATGCAAGGATAG    | qPCR analysis   |
| PSMA7-RT-R    | CTGCGTATAACGCTGCTTCAG  | qPCR analysis   |
| RFC4-RT-F     | CCGCTGACCAAGGATCGAG    | qPCR analysis   |
| RFC4-RT-R     | AGGGAACGGGTTTGGCTTTC   | qPCR analysis   |
| PHB2-siRNA-1  | GCGAGTGTTGTCTCGACCCAA  | PHB2 knockdown  |
| PHB2-siRNA-2  | GCTGAGCTTTAGCCGAGAGTA  | PHB2 knockdown  |
| c-Myc-siRNA-1 | CCTGAGACAGATCAGCAACAA  | c-Myc knockdown |
| c-Myc-siRNA-2 | CAGTTGAAACACAAACTTGAA  | c-Myc knockdown |

---



**Table S3: Antibodies for Immunoblotting, RIP and IP.**

| <b>Protein Name</b>                                         | <b>Company</b> | <b>Catalog Number</b> | <b>Dilutions in IB</b> | <b>Dilutions in RIP/IP</b> |
|-------------------------------------------------------------|----------------|-----------------------|------------------------|----------------------------|
| PHB2                                                        | Proteintech    | 12295-1-AP            | 1:1000                 | 5µg                        |
| HRP-conjugated GAPDH                                        | Proteintech    | HRP-60004             | 1:10000                | N/A                        |
| Lamin B1                                                    | Proteintech    | 12987-1-AP            | 1:1000                 | 5µg                        |
| c-Myc                                                       | abcam          | ab32072               | 1:1000                 | 5µg                        |
| CDC45                                                       | Proteintech    | 15678-1-AP            | 1:1000                 | N/A                        |
| MAD2L1                                                      | Proteintech    | 10337-1-AP            | 1:1000                 | N/A                        |
| FLAG                                                        | sigma          | F7425                 | 1:1000                 | 5µg                        |
| HA                                                          | sigma          | H3663                 | 1:1000                 | 5µg                        |
| His                                                         | Proteintech    | 66005-1-Ig            | 1:5000                 | 5µg                        |
| Goat Anti-Rabbit IgG, Fc fragment specific                  | Jackson        |                       |                        | N/A                        |
| Goat Anti-Rabbit IgG, F(ab') <sub>2</sub> fragment specific | Jackson        |                       |                        | N/A                        |
| Goat Anti-Mouse IgG, F(ab') <sub>2</sub> fragment specific  | Jackson        |                       |                        | N/A                        |
| Goat Anti- Mouse IgG, Fc fragment specific                  | Jackson        |                       |                        | N/A                        |

Abbreviations: IB: Immunoblotting; RIP: RNA immunoprecipitation; IP: immunoprecipitation.

**Table S4: RNA-seq analysis of the gene expression profile affected by LacRNA activated with two sgRNA.**

| Gene ID              | Signal Intensity (FPKM) |             |             | FC_(OE1/Ctrl) | FC_(OE2/Ctrl) |
|----------------------|-------------------------|-------------|-------------|---------------|---------------|
|                      | Ctrl-dcas9-vector       | LacRNA-OE-1 | LacRNA-OE-2 |               |               |
| <i>BBX</i>           | 1.31210123              | 2.609767006 | 2.84216971  | 1.988998216   | 2.166120757   |
| <i>COL13A1</i>       | 4.345154438             | 7.50817572  | 10.67766634 | 1.7279422     | 2.457373264   |
| <i>SPDEF</i>         | 0.133530069             | 0.071337505 | 0.035642441 | 0.534242999   | 0.266924455   |
| <i>BIK</i>           | 0.35757475              | 0.071636928 | 0.071584084 | 0.200341125   | 0.200193341   |
| <i>FBXO48</i>        | 0.125328701             | 0.426844378 | 0.125449857 | 3.405799119   | 1.000966706   |
| <i>HTRID</i>         | 0.240401225             | 0.457541392 | 0.794090955 | 1.903240684   | 3.303190131   |
| <i>BOC</i>           | 0.933763463             | 2.435593954 | 2.096584435 | 2.608362878   | 2.24530571    |
| <i>CIS</i>           | 0.727361231             | 1.57863731  | 2.572494128 | 2.170362184   | 3.536749029   |
| <i>CIR</i>           | 13.74067487             | 33.69966596 | 38.07607368 | 2.452548094   | 2.771048296   |
| <i>BSN</i>           | 0.069309619             | 0.132446946 | 0.153695898 | 1.910946112   | 2.217526242   |
| <i>CRISPLD1</i>      | 0.64942067              | 1.89244607  | 1.780738835 | 2.914052722   | 2.742042129   |
| <i>IGF1R</i>         | 2.449922934             | 5.148423374 | 5.601003671 | 2.101463398   | 2.286195861   |
| <i>ENPP5</i>         | 0.132251774             | 0.264954691 | 0.405964175 | 2.003411247   | 3.069631233   |
| <i>CA4</i>           | 1.528734137             | 3.730904945 | 3.283000236 | 2.440519155   | 2.14752857    |
| <i>CA6</i>           | 0.249099954             | 0.149714895 | 0.049868152 | 0.601023374   | 0.200193341   |
| <i>CA9</i>           | 3.41804508              | 1.286546961 | 0.870888919 | 0.376398477   | 0.254791525   |
| <i>CCK</i>           | 1.20150159              | 0.275097348 | 0.824683261 | 0.228961285   | 0.68637717    |
| <i>TBX15</i>         | 0.1894095               | 0.624009314 | 0.589843656 | 3.294498495   | 3.114118642   |
| <i>BCAM</i>          | 2.358862576             | 4.695924835 | 5.905342672 | 1.990758123   | 2.503470415   |
| <i>CFH</i>           | 0.309639632             | 1.191044202 | 1.024864838 | 3.846549594   | 3.309863242   |
| <i>CFI</i>           | 0.076371299             | 0.183603744 | 0.244624409 | 2.404093496   | 3.20309346    |
| <i>ZNF559-ZNF177</i> | 0.14988069              | 0.360327192 | 0.288049115 | 2.404093496   | 1.921856076   |
| <i>STON1</i>         | 0.226856517             | 0.327230567 | 0.593424812 | 1.442456098   | 2.615859659   |
| <i>EDARADD</i>       | 0.176808407             | 0.047229327 | 0.117986219 | 0.2671215     | 0.667311138   |
| <i>PLIN4</i>         | 0.013074307             | 0.041909142 | 0.041878227 | 3.205457995   | 3.20309346    |
| <i>DIO2</i>          | 0.040109315             | 0.085712482 | 0.096355412 | 2.136971996   | 2.402320095   |
| <i>DIO3</i>          | 2.148042703             | 9.061526052 | 16.38958809 | 4.218503682   | 7.630010365   |
| <i>COL14A1</i>       | 0.088476889             | 0.28360895  | 0.451668341 | 3.205457995   | 5.104930202   |
| <i>CPZ</i>           | 0.06708046              | 0.107511798 | 0.214864983 | 1.602728997   | 3.20309346    |
| <i>SAPCD1</i>        | 0.093004568             | 0.149061118 | 0.372377904 | 1.602728997   | 4.003866825   |
| <i>MAB21L3</i>       | 0.026383457             | 0.084571065 | 0.04225434  | 3.205457995   | 1.60154673    |
| <i>MAB21L1</i>       | 0.029305877             | 0.046969379 | 0.093869463 | 1.602728997   | 3.20309346    |
| <i>IL1R2</i>         | 0.290559973             | 0.139706668 | 0.093069075 | 0.480818699   | 0.320309346   |
| <i>TCEAL8</i>        | 3.022494984             | 0.90125402  | 1.688604753 | 0.298182139   | 0.558679092   |
| <i>LOC101927989</i>  | 0.119316785             | 0.286848706 | 0.286637109 | 2.404093496   | 2.402320095   |
| <i>SVOP</i>          | 0.294443033             | 0.098315081 | 0.098242558 | 0.333901874   | 0.333655569   |
| <i>C3orf58</i>       | 0.273866953             | 0.736782921 | 0.657916084 | 2.690295103   | 2.402320095   |
| <i>LOC101927680</i>  | 0.033382517             | 0.053503129 | 0.133659154 | 1.602728997   | 4.003866825   |
| <i>HLA-DMB</i>       | 0.243928945             | 0.244344996 | 0.732494259 | 1.001705623   | 3.002900119   |
| <i>TTL9</i>          | 0.385009871             | 0.308533242 | 0.056055573 | 0.801364499   | 0.145595157   |
| <i>HLA-DOB</i>       | 0.186280286             | 0.447835224 | 0.298336583 | 2.404093496   | 1.60154673    |
| <i>MB</i>            | 0.291255331             | 0.816905887 | 1.399377067 | 2.804775745   | 4.80464019    |
| <i>DSP</i>           | 0.639160272             | 1.66289703  | 1.269039403 | 2.601690222   | 1.985479165   |

|                     |             |             |             |             |             |
|---------------------|-------------|-------------|-------------|-------------|-------------|
| <i>SH2D3C</i>       | 0.027010838 | 0.303037377 | 0.194666039 | 11.21910298 | 7.206960285 |
| <i>COL15A1</i>      | 0.942739036 | 6.232690157 | 7.222070966 | 6.611257114 | 7.660731859 |
| <i>LOC102724752</i> | 0.07433873  | 0.297862094 | 0.357170848 | 4.006822493 | 4.80464019  |
| <i>LINGO1</i>       | 0.02449459  | 0.03925819  | 0.058843846 | 1.602728997 | 2.402320095 |
| <i>LINGO3</i>       | 0.159985322 | 0.064103279 | 0.064055993 | 0.400682249 | 0.400386683 |
| <i>LOC102724705</i> | 0.139202915 | 0.223104549 | 0.445879948 | 1.602728997 | 3.20309346  |
| <i>EFS</i>          | 0.109220749 | 0.240695485 | 0.2623832   | 2.203752371 | 2.402320095 |
| <i>EGF</i>          | 0.01521289  | 0.02438214  | 0.060910386 | 1.602728997 | 4.003866825 |
| <i>SWT1</i>         | 0.132663666 | 0.194905246 | 0.371817356 | 1.469168248 | 2.802706778 |
| <i>GPR161</i>       | 0.679478448 | 1.683030618 | 1.904378851 | 2.476944814 | 2.802706778 |
| <i>SLC16A11</i>     | 0.047250241 | 0.113593997 | 0.113510203 | 2.404093496 | 2.402320095 |
| <i>SLC16A14</i>     | 0.135594654 | 0.217321484 | 0.341253275 | 1.602728997 | 2.51671629  |
| <i>EN2</i>          | 0.125467134 | 0.040217963 | 0.080376591 | 0.320545799 | 0.640618692 |
| <i>GPR155</i>       | 0.067666548 | 0.099413544 | 0.189649493 | 1.469168248 | 2.802706778 |
| <i>F10</i>          | 0.166390985 | 0.488912703 | 0.399724406 | 2.938336495 | 2.402320095 |
| <i>COL16A1</i>      | 0.2288472   | 0.048904006 | 0.073301897 | 0.2136972   | 0.320309346 |
| <i>EPX</i>          | 0.054909561 | 0.022001286 | 0.021985057 | 0.400682249 | 0.400386683 |
| <i>F2R</i>          | 2.057134107 | 5.053054524 | 5.980408686 | 2.456356398 | 2.907155477 |
| <i>STRA6</i>        | 10.95524695 | 15.66129057 | 28.94099413 | 1.429569834 | 2.641747307 |
| <i>ADRA2C</i>       | 0.043509798 | 0.069734415 | 0.104524462 | 1.602728997 | 2.402320095 |
| <i>MEST</i>         | 1.666433942 | 4.823867697 | 3.948840975 | 2.894724822 | 2.369635468 |
| <i>AKAP9</i>        | 0.108129061 | 0.259952373 | 0.22729054  | 2.404093496 | 2.102030083 |
| <i>C17orf104</i>    | 0.036391364 | 0.087488243 | 0.058282471 | 2.404093496 | 1.60154673  |
| <i>HIST1H3J</i>     | 0.178226327 | 0.285648502 | 0.570875582 | 1.602728997 | 3.20309346  |
| <i>NHLH1</i>        | 0.033291201 | 0.053356774 | 0.079976122 | 1.602728997 | 2.402320095 |
| <i>HIST1H3F</i>     | 0.548447538 | 0.293004257 | 0.14639406  | 0.534242999 | 0.266924455 |
| <i>HIST1H3G</i>     | 0.729697509 | 2.046637875 | 1.314725242 | 2.804775745 | 1.801740071 |
| <i>HIST1H4I</i>     | 0.460498293 | 0.184513492 | 0.184377384 | 0.400682249 | 0.400386683 |
| <i>HIST1H4E</i>     | 0.903895854 | 3.259575214 | 0.904769655 | 3.606140244 | 1.000966706 |
| <i>ANKRD6</i>       | 0.029694034 | 0.095182979 | 0.083223671 | 3.205457995 | 2.802706778 |
| <i>AKAP7</i>        | 0.116144764 | 0.255954298 | 0.395273941 | 2.203752371 | 3.403286801 |
| <i>GLTPD2</i>       | 0.365631692 | 1.17201703  | 0.695371786 | 3.205457995 | 1.901836742 |
| <i>TGFB2</i>        | 0.271859506 | 0.607710711 | 1.054115913 | 2.235385181 | 3.877428925 |
| <i>FES</i>          | 0.029745874 | 0.071511863 | 0.047639408 | 2.404093496 | 1.60154673  |
| <i>PALM3</i>        | 0.492237135 | 1.577845461 | 1.632991604 | 3.205457995 | 3.317489655 |
| <i>PALMD</i>        | 0.264366747 | 0.37074472  | 0.952640323 | 1.402387873 | 3.603480143 |
| <i>DYX1C1</i>       | 0.085491404 | 0.205529329 | 0.376525816 | 2.404093496 | 4.404253508 |
| <i>RGS11</i>        | 0.176381334 | 0.282691478 | 0.621462486 | 1.602728997 | 3.523402806 |
| <i>FRS3</i>         | 0.703744523 | 1.347227928 | 1.565388527 | 1.914370747 | 2.224370458 |
| <i>MFI2</i>         | 2.579627076 | 5.52981767  | 7.38486554  | 2.143650034 | 2.86276478  |
| <i>OLR1</i>         | 0.033860169 | 0.217074696 | 0.081342963 | 6.410915989 | 2.402320095 |
| <i>FRY</i>          | 0.02384777  | 0.08918353  | 0.044558871 | 3.739700994 | 1.868471185 |
| <i>LOC102724549</i> | 0.344442793 | 0.184016151 | 0.091940205 | 0.534242999 | 0.266924455 |
| <i>DLX4</i>         | 0.974835939 | 2.037910208 | 2.172167388 | 2.090516084 | 2.228238929 |
| <i>SLC14A1</i>      | 0.019548459 | 0.062661764 | 0.26611605  | 3.205457995 | 13.61314721 |
| <i>LOC102724560</i> | 0.112341342 | 0.300087877 | 0.359839817 | 2.671214996 | 3.20309346  |
| <i>COMMD10</i>      | 4.905729708 | 1.917696404 | 2.826515652 | 0.390909512 | 0.576166202 |
| <i>FYB</i>          | 0.123110093 | 0.394624231 | 0.492916416 | 3.205457995 | 4.003866825 |
| <i>FYN</i>          | 1.150611088 | 2.427461126 | 3.140209081 | 2.109714701 | 2.729166367 |

|                     |             |             |             |             |             |
|---------------------|-------------|-------------|-------------|-------------|-------------|
| <i>ATP6V1G2</i>     | 0.797182011 | 1.320255615 | 2.127873737 | 1.656153297 | 2.66924455  |
| <i>ZNF585B</i>      | 0.493867734 | 0.901471714 | 1.296282863 | 1.825330247 | 2.624757141 |
| <i>GK5</i>          | 0.351066693 | 0.850248984 | 0.737171848 | 2.421901596 | 2.099805713 |
| <i>ADPRH</i>        | 0.123861855 | 0.238220385 | 0.376904044 | 1.923274797 | 3.042938787 |
| <i>GRTP1</i>        | 1.068910718 | 2.455549691 | 1.883101511 | 2.297244896 | 1.761701403 |
| <i>TIMP3</i>        | 0.124232132 | 0.186666037 | 0.348186237 | 1.502558435 | 2.802706778 |
| <i>TMSB15B</i>      | 1.53499431  | 0.205014991 | 0.40972752  | 0.13356075  | 0.266924455 |
| <i>MGLL</i>         | 0.422106901 | 0.147070211 | 0.146961723 | 0.348419347 | 0.348162333 |
| <i>KALI</i>         | 0.026985171 | 0.216249579 | 0.194481054 | 8.013644987 | 7.206960285 |
| <i>RAB38</i>        | 0.295806195 | 0.039508097 | 0.236873722 | 0.13356075  | 0.800773365 |
| <i>LOC102724620</i> | 0.383748577 | 0.922567459 | 1.434046319 | 2.404093496 | 3.73694237  |
| <i>RAB17</i>        | 0.127852202 | 0.614737296 | 0.341268794 | 4.808186992 | 2.66924455  |
| <i>RALGPS1</i>      | 0.184827302 | 0.370285095 | 0.401727261 | 2.003411247 | 2.173527705 |
| <i>VAV3</i>         | 1.500554303 | 3.335480841 | 3.318715585 | 2.222832478 | 2.21165977  |
| <i>FAIM3</i>        | 0.745362597 | 0.265469833 | 0.110530836 | 0.356161999 | 0.148291364 |
| <i>DNMI</i>         | 3.857595723 | 7.381009054 | 8.191215037 | 1.913370292 | 2.123399035 |
| <i>FLJ22184</i>     | 0.075424687 | 0.151106667 | 0.317089923 | 2.003411247 | 4.204060166 |
| <i>FIGNL2</i>       | 0.090745829 | 0.058176389 | 0.014533369 | 0.641091599 | 0.160154673 |
| <i>SH3BGRL2</i>     | 0.293386773 | 0.74941231  | 0.528606705 | 2.55434934  | 1.801740071 |
| <i>SRSF12</i>       | 0.045302943 | 0.127064596 | 0.14510956  | 2.804775745 | 3.20309346  |
| <i>LOC102724369</i> | 0.121877231 | 0.586008515 | 0.4879802   | 4.808186992 | 4.003866825 |
| <i>GPR64</i>        | 0.017364897 | 0.027831224 | 0.069526735 | 1.602728997 | 4.003866825 |
| <i>SH2D6</i>        | 0.285879813 | 0.610917154 | 0.610466506 | 2.136971996 | 2.13539564  |
| <i>SLC12A8</i>      | 5.655207669 | 11.20328074 | 13.70223378 | 1.981055585 | 2.422940868 |
| <i>PPP1R3G</i>      | 0.392590711 | 0.275282226 | 0.078594046 | 0.701193936 | 0.200193341 |
| <i>PPP1R36</i>      | 0.060635007 | 0.388725933 | 0.097109796 | 6.410915989 | 1.60154673  |
| <i>PPP1R1B</i>      | 0.046199666 | 0.296182178 | 0.850895627 | 6.410915989 | 18.4177874  |
| <i>HNF4G</i>        | 0.062320544 | 0.033294315 | 0.016634877 | 0.534242999 | 0.266924455 |
| <i>KIF1A</i>        | 0.046119632 | 0.199576633 | 0.413631376 | 4.327368293 | 8.968661688 |
| <i>DOK6</i>         | 0.086178449 | 0.191834304 | 0.222363643 | 2.226012496 | 2.580269732 |
| <i>DOK7</i>         | 0.099601151 | 0.026605609 | 0.053171966 | 0.2671215   | 0.53384891  |
| <i>IL7</i>          | 0.287256883 | 0.460394936 | 0.690082983 | 1.602728997 | 2.402320095 |
| <i>VCAN</i>         | 0.102922259 | 0.599341908 | 0.642855746 | 5.82324869  | 6.246032247 |
| <i>TASIR3</i>       | 0.532659221 | 0.346819029 | 0.159952244 | 0.651108655 | 0.300290012 |
| <i>MAPK13</i>       | 0.026840638 | 0.107545671 | 0.085973071 | 4.006822493 | 3.20309346  |
| <i>SERPINA3</i>     | 3.375539374 | 8.587420375 | 23.29764791 | 2.544014282 | 6.901903765 |
| <i>SERPINB3</i>     | 0.143824734 | 0.345768108 | 0.268732371 | 2.404093496 | 1.868471185 |
| <i>SEMA5B</i>       | 0.086349264 | 0.207591705 | 0.15212162  | 2.404093496 | 1.761701403 |
| <i>CHRM4</i>        | 0.058032823 | 0.418548997 | 0.929422779 | 7.212280488 | 16.0154673  |
| <i>ANKRD36B</i>     | 0.02846381  | 0.091239548 | 0.034189592 | 3.205457995 | 1.201160048 |
| <i>RHOBTB1</i>      | 0.093146932 | 0.238862863 | 0.25360458  | 2.564366396 | 2.722629441 |
| <i>SLC37A2</i>      | 0.548186123 | 0.113891788 | 0.162582536 | 0.207761166 | 0.296582728 |
| <i>SYCP2</i>        | 0.045925706 | 0.085874204 | 0.159363022 | 1.869850497 | 3.470017915 |
| <i>SEMA3A</i>       | 0.029105632 | 0.05831055  | 0.104881566 | 2.003411247 | 3.603480143 |
| <i>SEMA3B</i>       | 0.116382765 | 0.326427557 | 1.281448006 | 2.804775745 | 11.01063377 |
| <i>SEMA4D</i>       | 0.655744843 | 1.780829382 | 1.225240344 | 2.715735246 | 1.868471185 |
| <i>SYCP3</i>        | 0.057953867 | 0.278653028 | 0.092815826 | 4.808186992 | 1.60154673  |
| <i>SRPK3</i>        | 0.085107077 | 0.204605371 | 0.272605922 | 2.404093496 | 3.20309346  |
| <i>SYDE2</i>        | 0.108502039 | 0.173899364 | 0.275137552 | 1.602728997 | 2.535782323 |

|                     |             |             |             |             |             |
|---------------------|-------------|-------------|-------------|-------------|-------------|
| <i>OPN3</i>         | 4.175452797 | 1.685999042 | 1.477400845 | 0.403788313 | 0.353830092 |
| <i>SIPR3</i>        | 3.785025272 | 6.548568381 | 9.761205036 | 1.730125405 | 2.578900888 |
| <i>SIPR2</i>        | 0.499172954 | 0.990524437 | 1.389518174 | 1.98433114  | 2.783640745 |
| <i>SIPR5</i>        | 1.056383084 | 2.048099759 | 2.510482458 | 1.938785077 | 2.376488696 |
| <i>ATAD5</i>        | 0.204624942 | 0.579393046 | 0.404183568 | 2.831487895 | 1.975240967 |
| <i>KMT2C</i>        | 0.658586724 | 1.407381387 | 1.294475009 | 2.136971996 | 1.965534623 |
| <i>SGSM1</i>        | 0.013794071 | 0.022108158 | 0.033137775 | 1.602728997 | 2.402320095 |
| <i>KMO</i>          | 0.016177779 | 0.051857191 | 0.025909469 | 3.205457995 | 1.60154673  |
| <i>WDR86</i>        | 0.057620686 | 0.138525516 | 0.207634998 | 2.404093496 | 3.603480143 |
| <i>WDR52</i>        | 0.041520706 | 0.113128947 | 0.139644436 | 2.724639295 | 3.363248133 |
| <i>WDR31</i>        | 0.161111506 | 0.272563532 | 0.43004601  | 1.691769497 | 2.66924455  |
| <i>LOC102724232</i> | 1.143519251 | 0.458187866 | 0.457849879 | 0.400682249 | 0.400386683 |
| <i>WDR17</i>        | 0.045308966 | 0.108926992 | 0.099776087 | 2.404093496 | 2.202126754 |
| <i>ADTRP</i>        | 0.917031046 | 0.404181869 | 0.367167018 | 0.440750474 | 0.400386683 |
| <i>LBH</i>          | 0.405953226 | 1.231555335 | 0.882350584 | 3.033737031 | 2.173527705 |
| <i>WDR96</i>        | 0.03171712  | 0.139793357 | 0.101592899 | 4.407504743 | 3.20309346  |
| <i>IFITM1</i>       | 2.613986126 | 5.808186207 | 15.6990785  | 2.221965201 | 6.005800238 |
| <i>HS6ST3</i>       | 1.047981764 | 1.478424993 | 2.762353116 | 1.41073542  | 2.635878993 |
| <i>TMEM74B</i>      | 0.04362119  | 0.139825892 | 0.069861374 | 3.205457995 | 1.60154673  |
| <i>DOCK11</i>       | 0.969833133 | 2.259986253 | 1.982415909 | 2.330283608 | 2.044079379 |
| <i>GPSM3</i>        | 0.516316268 | 0.183892234 | 0.229695731 | 0.356161999 | 0.444874092 |
| <i>LXN</i>          | 0.30534833  | 0.734085935 | 2.200633291 | 2.404093496 | 7.206960285 |
| <i>HLA-DPA1</i>     | 0.576922241 | 0.115581251 | 0.346487973 | 0.200341125 | 0.600580024 |
| <i>NSUN7</i>        | 0.069112102 | 0.239997268 | 0.092238551 | 3.472579494 | 1.334622275 |
| <i>FAM227A</i>      | 0.033013828 | 0.152122633 | 0.072700635 | 4.607845867 | 2.202126754 |
| <i>FSCN2</i>        | 0.206401415 | 0.330805534 | 0.557822551 | 1.602728997 | 2.702610107 |
| <i>DSC2</i>         | 0.097455311 | 0.260324088 | 0.325165072 | 2.671214996 | 3.336555688 |
| <i>DSC3</i>         | 0.036626047 | 0.078268836 | 0.068434713 | 2.136971996 | 1.868471185 |
| <i>MDK</i>          | 91.06001321 | 176.3641459 | 189.8663738 | 1.936790252 | 2.085068595 |
| <i>ME3</i>          | 1.73109929  | 0.47225243  | 0.796338117 | 0.272804936 | 0.460018742 |
| <i>MGP</i>          | 89.76121512 | 191.4618716 | 322.5728017 | 2.133013366 | 3.59367686  |
| <i>COL9A3</i>       | 0.137130276 | 0.274728338 | 0.46669366  | 2.003411247 | 3.403286801 |
| <i>MKX</i>          | 0.069810585 | 0.279718623 | 0.260878134 | 4.006822493 | 3.73694237  |
| <i>MSC</i>          | 0.206978096 | 0.497594694 | 0.43093062  | 2.404093496 | 2.082010749 |
| <i>HS3ST3B1</i>     | 0.109889951 | 0.264185715 | 0.263990837 | 2.404093496 | 2.402320095 |
| <i>DYNLT3</i>       | 0.807326655 | 1.447964631 | 2.001027112 | 1.793530068 | 2.478584225 |
| <i>MMP3</i>         | 1.677745422 | 0.597549164 | 0.522469829 | 0.356161999 | 0.311411864 |
| <i>MX1</i>          | 3.181966611 | 1.454248443 | 1.393456154 | 0.457028191 | 0.437922934 |
| <i>NKX2-6</i>       | 0.282093325 | 1.507063841 | 0.978868892 | 5.342429991 | 3.470017915 |
| <i>FZD1</i>         | 3.211843266 | 5.006466079 | 9.942815333 | 1.558751677 | 3.095672643 |
| <i>CDK18</i>        | 0.476902812 | 2.223551902 | 3.298150148 | 4.662484356 | 6.915769971 |
| <i>WNT10A</i>       | 0.179351967 | 0.02874526  | 0.057448111 | 0.1602729   | 0.320309346 |
| <i>DNAH10</i>       | 0.024156003 | 0.062912731 | 0.058030452 | 2.604434621 | 2.402320095 |
| <i>DNAH14</i>       | 0.08519827  | 0.151180067 | 0.214419873 | 1.774449961 | 2.51671629  |
| <i>BNC1</i>         | 0.143542012 | 0.07189342  | 0.014368078 | 0.500852812 | 0.100096671 |
| <i>DTNA</i>         | 0.175421471 | 0.572347337 | 0.431452298 | 3.262698316 | 2.459518193 |
| <i>NMU</i>          | 0.522010933 | 0.083664206 | 0.08360249  | 0.1602729   | 0.160154673 |
| <i>NOG</i>          | 6.979275132 | 3.500100012 | 1.58650307  | 0.501499073 | 0.22731631  |
| <i>NPY</i>          | 0.608515601 | 1.828660499 | 3.410981601 | 3.00511687  | 5.605413555 |

|                 |             |             |             |             |             |
|-----------------|-------------|-------------|-------------|-------------|-------------|
| <i>COL3A1</i>   | 36.01658643 | 72.77158344 | 76.09781903 | 2.020501959 | 2.112854842 |
| <i>CDKL5</i>    | 0.0252222   | 0.14148523  | 0.114451174 | 5.609551491 | 4.537715735 |
| <i>TBX1</i>     | 0.693109387 | 2.149285209 | 1.206572904 | 3.100932191 | 1.740811663 |
| <i>TBX6</i>     | 0.121356388 | 0.259335202 | 0.453501827 | 2.136971996 | 3.73694237  |
| <i>HSD17B3</i>  | 0.217697234 | 0.581516116 | 0.929739448 | 2.671214996 | 4.27079128  |
| <i>TEKT2</i>    | 0.046655084 | 0.22432637  | 0.410961639 | 4.808186992 | 8.808507015 |
| <i>ODF3B</i>    | 0.242195264 | 0.58226006  | 0.533344671 | 2.404093496 | 2.202126754 |
| <i>CHI3L1</i>   | 2.550664197 | 6.949639902 | 3.825052857 | 2.724639295 | 1.49963012  |
| <i>DHRS3</i>    | 82.19998505 | 205.9403872 | 313.8513828 | 2.505357965 | 3.818144037 |
| <i>DHRS9</i>    | 0.059491749 | 0.166861014 | 0.285836447 | 2.804775745 | 4.80464019  |
| <i>TRPC6</i>    | 0.018471853 | 0.059210748 | 0.05916707  | 3.205457995 | 3.20309346  |
| <i>NPIPB4</i>   | 0.015355477 | 0.036916001 | 0.024592513 | 2.404093496 | 1.60154673  |
| <i>NPIPB5</i>   | 0.669574411 | 1.609719486 | 1.090227287 | 2.404093496 | 1.628239176 |
| <i>PPL</i>      | 0.355081242 | 0.569099003 | 1.038933158 | 1.602728997 | 2.92590268  |
| <i>PSD</i>      | 0.061069666 | 0.195756249 | 0.146708886 | 3.205457995 | 2.402320095 |
| <i>PTGER1</i>   | 0.539570484 | 1.056959763 | 1.392237388 | 1.958890997 | 2.580269732 |
| <i>PTGER2</i>   | 0.034351687 | 0.11011289  | 0.385110826 | 3.205457995 | 11.21082711 |
| <i>MPP7</i>     | 0.032722176 | 0.340891068 | 0.288233513 | 10.41773848 | 8.808507015 |
| <i>TRPV2</i>    | 0.606781939 | 0.121563376 | 0.194357926 | 0.200341125 | 0.320309346 |
| <i>TRPV4</i>    | 0.544434631 | 1.270933443 | 1.156264949 | 2.334409627 | 2.123790229 |
| <i>TDO2</i>     | 0.100049541 | 0.280616526 | 0.600877557 | 2.804775745 | 6.005800238 |
| <i>AGAP2</i>    | 2.716774359 | 4.535680255 | 6.345268258 | 1.669509372 | 2.335588981 |
| <i>WFIKKN1</i>  | 0.043733154 | 0.140184788 | 0.07004069  | 3.205457995 | 1.60154673  |
| <i>TMEM40</i>   | 9.382572808 | 3.032817783 | 4.35645961  | 0.323239462 | 0.464313968 |
| <i>TRMT10A</i>  | 0.160566852 | 0.441163115 | 0.385732976 | 2.747535424 | 2.402320095 |
| <i>PLXDC2</i>   | 0.229235329 | 0.545536466 | 0.461695161 | 2.379809723 | 2.014066342 |
| <i>TMEM56</i>   | 0.237269349 | 0.610447011 | 0.529997141 | 2.572801812 | 2.233736229 |
| <i>SESN3</i>    | 0.063152101 | 0.144593862 | 0.245628242 | 2.289612853 | 3.88947063  |
| <i>TMEM17</i>   | 0.840857922 | 0.425579171 | 0.177193849 | 0.506124947 | 0.210729833 |
| <i>KIF21A</i>   | 0.064141081 | 0.123360925 | 0.154087409 | 1.923274797 | 2.402320095 |
| <i>KIF21B</i>   | 0.068565138 | 0.151100586 | 0.130399699 | 2.203752371 | 1.901836742 |
| <i>ST6GAL1</i>  | 1.525359133 | 2.514988385 | 4.043476851 | 1.648784428 | 2.650835967 |
| <i>RSAD2</i>    | 0.121287278 | 0.019439064 | 0.077698898 | 0.1602729   | 0.640618692 |
| <i>RAMP2</i>    | 0.325575226 | 1.739362853 | 1.042847878 | 5.342429991 | 3.20309346  |
| <i>STAMBPL1</i> | 2.550061441 | 0.86043314  | 1.155354146 | 0.337416631 | 0.453069141 |
| <i>FRRS1L</i>   | 0.573202249 | 0.229671966 | 0.286878183 | 0.400682249 | 0.500483353 |
| <i>SCN9A</i>    | 0.061088434 | 0.223790181 | 0.083859412 | 3.663380565 | 1.37275434  |
| <i>SLC30A2</i>  | 1.205712271 | 2.125673022 | 2.951678377 | 1.763001897 | 2.448078573 |
| <i>SCN5A</i>    | 0.180322121 | 0.345203393 | 0.441213518 | 1.914370747 | 2.446807504 |
| <i>BCL2A1</i>   | 0.271024976 | 0.072396598 | 0.072343194 | 0.2671215   | 0.266924455 |
| <i>COL12A1</i>  | 4.429198971 | 11.39700272 | 7.399935902 | 2.57315212  | 1.670716522 |
| <i>REL</i>      | 0.032867355 | 0.210709852 | 0.21055442  | 6.410915989 | 6.40618692  |
| <i>RET</i>      | 0.014930281 | 0.047858389 | 0.035867314 | 3.205457995 | 2.402320095 |
| <i>RHD</i>      | 0.029046091 | 0.139659036 | 0.139556015 | 4.808186992 | 4.80464019  |
| <i>MORN3</i>    | 0.22070514  | 0.530595793 | 0.530204394 | 2.404093496 | 2.402320095 |
| <i>GCSAM</i>    | 0.142065899 | 0.075897712 | 0.056881294 | 0.534242999 | 0.400386683 |
| <i>C4orf36</i>  | 1.842898773 | 0.805545628 | 0.939109979 | 0.437107908 | 0.50958305  |
| <i>C4orf19</i>  | 0.234173129 | 1.388669436 | 0.787582338 | 5.93009729  | 3.363248133 |
| <i>KLF7</i>     | 1.505233659 | 2.882025038 | 3.154945629 | 1.91466954  | 2.095983976 |

|                  |             |             |             |             |             |
|------------------|-------------|-------------|-------------|-------------|-------------|
| <i>KLF9</i>      | 0.687033744 | 1.271541709 | 2.017247183 | 1.85077039  | 2.936169005 |
| <i>OXTR</i>      | 21.09781218 | 37.32072022 | 55.43920565 | 1.76893793  | 2.627722968 |
| <i>BCL11B</i>    | 0.074135416 | 0.01697414  | 0.050884857 | 0.228961285 | 0.68637717  |
| <i>KLLN</i>      | 0.139430743 | 0.271356059 | 0.382808316 | 1.946170925 | 2.74550868  |
| <i>GALNT12</i>   | 0.685275339 | 1.897082044 | 4.065740409 | 2.768350086 | 5.933002659 |
| <i>COL4A1</i>    | 2.373695273 | 5.915617799 | 4.282003847 | 2.492155529 | 1.803939998 |
| <i>C5AR1</i>     | 0.218254955 | 0.670456796 | 0.34954551  | 3.071897245 | 1.60154673  |
| <i>NR4A3</i>     | 0.059721125 | 0.13161057  | 0.143469258 | 2.203752371 | 2.402320095 |
| <i>ARAP2</i>     | 0.01132122  | 0.036289697 | 0.045328659 | 3.205457995 | 4.003866825 |
| <i>AGAP9</i>     | 0.285520517 | 0.486212762 | 0.657332022 | 1.70289956  | 2.302223424 |
| <i>AGAP5</i>     | 0.175581583 | 0.337691634 | 0.393682955 | 1.923274797 | 2.242165422 |
| <i>UNC5A</i>     | 0.087872289 | 0.0528133   | 0.017591447 | 0.601023374 | 0.200193341 |
| <i>UNC5C</i>     | 0.008574093 | 0.013741947 | 0.04119543  | 1.602728997 | 4.80464019  |
| <i>ADAMTS16</i>  | 0.548079995 | 0.096077592 | 0.178298194 | 0.175298484 | 0.32531418  |
| <i>ADAMTS13</i>  | 0.206484793 | 0.565354407 | 0.399589846 | 2.73799537  | 1.935202299 |
| <i>SHF</i>       | 0.920075589 | 1.966175769 | 2.183028224 | 2.136971996 | 2.372661822 |
| <i>MMP24</i>     | 0.196612472 | 0.063023302 | 0.125953625 | 0.320545799 | 0.640618692 |
| <i>MMP28</i>     | 0.138242895 | 0.138478686 | 0.498155528 | 1.001705623 | 3.603480143 |
| <i>MMP11</i>     | 1.846270246 | 3.95549268  | 3.771540912 | 2.142423456 | 2.042789197 |
| <i>BMP8A</i>     | 0.075712926 | 0.02426946  | 0.048503116 | 0.320545799 | 0.640618692 |
| <i>BMP8B</i>     | 0.022579429 | 0.090471762 | 0.126567035 | 4.006822493 | 5.605413555 |
| <i>SP9</i>       | 0.117102659 | 0.328446697 | 0.56263614  | 2.804775745 | 4.80464019  |
| <i>SPDYE5</i>    | 0.029175406 | 0.046760268 | 0.070088663 | 1.602728997 | 2.402320095 |
| <i>UNC79</i>     | 0.009580767 | 0.046066121 | 0.030688094 | 4.808186992 | 3.20309346  |
| <i>VMO1</i>      | 1.165564709 | 0.254738776 | 0.169700577 | 0.218553954 | 0.145595157 |
| <i>RAC2</i>      | 1.240389181 | 0.316273954 | 0.316040651 | 0.254979613 | 0.254791525 |
| <i>MST1</i>      | 0.133488223 | 0.406496348 | 0.299302679 | 3.045185095 | 2.242165422 |
| <i>GAB2</i>      | 0.30480209  | 1.110261701 | 1.142725988 | 3.642565903 | 3.7490753   |
| <i>CNKSR1</i>    | 0.077612072 | 0.041463706 | 0.02071656  | 0.534242999 | 0.266924455 |
| <i>ZFP14</i>     | 0.045478278 | 0.109334032 | 0.081940036 | 2.404093496 | 1.801740071 |
| <i>TGM2</i>      | 60.06027264 | 21.89792196 | 28.63067677 | 0.36459911  | 0.476699081 |
| <i>MSX2</i>      | 0.1521289   | 0.030477675 | 0.030455193 | 0.200341125 | 0.200193341 |
| <i>GYLTL1B</i>   | 1.534393294 | 2.860175858 | 3.979923716 | 1.864043508 | 2.593809378 |
| <i>SLIT3</i>     | 1.400323554 | 2.798410397 | 2.838396442 | 1.998402719 | 2.02695758  |
| <i>TNIP3</i>     | 0.10431696  | 0.501575451 | 0.222757982 | 4.808186992 | 2.13539564  |
| <i>BTG2</i>      | 1.539239316 | 2.01386407  | 4.578161145 | 1.308350202 | 2.97430107  |
| <i>DENND2D</i>   | 0.025847143 | 0.062138949 | 0.206977039 | 2.404093496 | 8.00773365  |
| <i>RARB</i>      | 1.981862739 | 3.467185045 | 5.565756347 | 1.749457708 | 2.808346027 |
| <i>SYNE4</i>     | 0.110567403 | 0.044302396 | 0.044269716 | 0.400682249 | 0.400386683 |
| <i>TRO</i>       | 2.423556349 | 5.170142614 | 5.05925464  | 2.133287562 | 2.087533324 |
| <i>LANCL3</i>    | 0.025567882 | 0.040978387 | 0.122844475 | 1.602728997 | 4.80464019  |
| <i>TUB</i>       | 0.996011507 | 2.192302159 | 2.03116909  | 2.201081156 | 2.039302836 |
| <i>VNN1</i>      | 0.177299031 | 0.390723159 | 0.319446768 | 2.203752371 | 1.801740071 |
| <i>TENM2</i>     | 16.35888829 | 37.42895669 | 31.87343313 | 2.287989014 | 1.948386257 |
| <i>GOLGA6L9</i>  | 0.105126866 | 0.336979754 | 0.273594082 | 3.205457995 | 2.602513436 |
| <i>HIST1H2AK</i> | 0.1852004   | 0.593652104 | 0.296607096 | 3.205457995 | 1.60154673  |
| <i>GLP2R</i>     | 0.032994649 | 0.052881481 | 0.184948654 | 1.602728997 | 5.605413555 |
| <i>RBKS</i>      | 0.677260042 | 0.314213352 | 0.342525349 | 0.463947868 | 0.505751599 |
| <i>HIST1H2BN</i> | 0.379475208 | 1.672538779 | 0.759684098 | 4.407504743 | 2.001933413 |

|                  |             |             |             |             |             |
|------------------|-------------|-------------|-------------|-------------|-------------|
| <i>HIST1H2BL</i> | 2.632871035 | 1.507063841 | 0.752976071 | 0.572403213 | 0.285990488 |
| <i>GBP2</i>      | 0.26796477  | 0.330365313 | 0.775785798 | 1.23286846  | 2.895103704 |
| <i>COL1A1</i>    | 5.18886089  | 12.23261878 | 9.990659792 | 2.357476725 | 1.92540521  |
| <i>ADSSL1</i>    | 0.56418665  | 1.167974476 | 1.129464106 | 2.070191622 | 2.001933413 |
| <i>GAREM</i>     | 0.024212643 | 0.009701576 | 0.00969442  | 0.400682249 | 0.400386683 |
| <i>MXRA5</i>     | 0.182958615 | 0.353212571 | 0.419546741 | 1.930559929 | 2.293123727 |
| <i>NDRG4</i>     | 0.239303888 | 0.019176964 | 0.134139726 | 0.08013645  | 0.560541356 |
| <i>MMRN2</i>     | 1.356243498 | 0.590385151 | 0.616765541 | 0.43530911  | 0.454760183 |
| <i>GSDMB</i>     | 0.186280286 | 0.721512306 | 0.944732513 | 3.873261744 | 5.071564645 |
| <i>TMEM173</i>   | 1.410077532 | 3.295792716 | 2.57195854  | 2.337313121 | 1.823983776 |
| <i>VTN</i>       | 0.050770074 | 0.122056005 | 0.081310646 | 2.404093496 | 1.60154673  |
| <i>CDRT4</i>     | 0.375145727 | 0.655916656 | 0.98314922  | 1.748431633 | 2.620712831 |
| <i>IFNLR1</i>    | 0.018670213 | 0.044884939 | 0.059802439 | 2.404093496 | 3.20309346  |
| <i>WAS</i>       | 0.046527681 | 0.074571264 | 0.111774383 | 1.602728997 | 2.402320095 |
| <i>LILRB3</i>    | 0.390661834 | 0.111808045 | 0.022345114 | 0.286201607 | 0.057198098 |
| <i>TJP3</i>      | 0.21823166  | 0.437207762 | 0.699016402 | 2.003411247 | 3.20309346  |
| <i>AMY2B</i>     | 0.075996596 | 0.243603896 | 0.152140125 | 3.205457995 | 2.001933413 |
| <i>LMX1B</i>     | 0.234648812 | 0.763909361 | 0.692883162 | 3.255543276 | 2.952851784 |
| <i>SELIL3</i>    | 0.093638365 | 0.300153845 | 0.599864867 | 3.205457995 | 6.40618692  |
| <i>UPK1B</i>     | 0.041395619 | 0.099518939 | 0.165742546 | 2.404093496 | 4.003866825 |
| <i>PDE5A</i>     | 0.134084136 | 0.429801066 | 0.819924036 | 3.205457995 | 6.114996606 |
| <i>SAMD5</i>     | 0.161654998 | 0.4642014   | 0.183386108 | 2.87155612  | 1.134428934 |
| <i>LIMS2</i>     | 0.109127478 | 0.116601182 | 0.436931887 | 1.068485998 | 4.003866825 |
| <i>LEAP2</i>     | 0.361494417 | 0.193125861 | 0.0964917   | 0.534242999 | 0.266924455 |
| <i>HAND2</i>     | 0.179882146 | 0.201811632 | 0.604988291 | 1.121910298 | 3.363248133 |
| <i>KIAA1549L</i> | 0.234568051 | 0.405320035 | 0.833521575 | 1.7279422   | 3.553431807 |
| <i>SYT15</i>     | 0.030933981 | 0.099157577 | 0.099084433 | 3.205457995 | 3.20309346  |
| <i>SYT17</i>     | 0.279135597 | 0.603961266 | 0.894097405 | 2.163684146 | 3.20309346  |
| <i>SYT12</i>     | 7.142709502 | 19.63567787 | 24.82952181 | 2.749051724 | 3.476204906 |
| <i>PIK3AP1</i>   | 0.017707791 | 0.198665535 | 0.042539783 | 11.21910298 | 2.402320095 |
| <i>KCTD12</i>    | 0.573684742 | 1.28067806  | 1.137540761 | 2.232372532 | 1.98286738  |
| <i>LPAR1</i>     | 0.827542876 | 2.258340507 | 3.779034485 | 2.728970995 | 4.566572433 |
| <i>IL11</i>      | 0.035825141 | 0.057417992 | 0.086063455 | 1.602728997 | 2.402320095 |
| <i>IL1B</i>      | 0.704899869 | 0.928019986 | 3.749660625 | 1.316527391 | 5.319423068 |
| <i>MGAT3</i>     | 0.015799737 | 0.139274835 | 0.265692187 | 8.815009485 | 16.81624067 |
| <i>REM2</i>      | 0.229134438 | 0.110172123 | 0.036696951 | 0.480818699 | 0.160154673 |
| <i>IL32</i>      | 0.220895897 | 0.118012086 | 0.058962517 | 0.534242999 | 0.266924455 |
| <i>CACNA1A</i>   | 0.029560092 | 0.126338176 | 0.11835467  | 4.273943993 | 4.003866825 |
| <i>CACNA1H</i>   | 0.042132633 | 0.362958662 | 0.210866815 | 8.614668361 | 5.004833531 |
| <i>CACNA1G</i>   | 0.033897218 | 0.101865103 | 0.061073977 | 3.00511687  | 1.801740071 |
| <i>SNTG1</i>     | 0.025071273 | 0.100456139 | 0.040152815 | 4.006822493 | 1.60154673  |
| <i>TMEM249</i>   | 0.159935264 | 0.341777181 | 0.298834433 | 2.136971996 | 1.868471185 |
| <i>RERG</i>      | 0.109925399 | 0.322997812 | 0.381443104 | 2.938336495 | 3.470017915 |
| <i>TMEM221</i>   | 0.044141028 | 0.106119159 | 0.600898313 | 2.404093496 | 13.61314721 |
| <i>ZNF804A</i>   | 0.054552092 | 0.014572037 | 0.029122575 | 0.2671215   | 0.53384891  |
| <i>NYNRIN</i>    | 0.130114065 | 0.225915717 | 0.32125829  | 1.736289747 | 2.469051209 |
| <i>PLEKHS1</i>   | 0.296836879 | 0.158583024 | 0.079233022 | 0.534242999 | 0.266924455 |
| <i>PCDHA1</i>    | 0.015732629 | 0.02521514  | 0.06299135  | 1.602728997 | 4.003866825 |
| <i>FAM211B</i>   | 0.298770185 | 1.060305487 | 1.367126894 | 3.548899923 | 4.5758478   |



|                     |             |             |             |             |             |
|---------------------|-------------|-------------|-------------|-------------|-------------|
| <i>FAM211A</i>      | 0.332427821 | 0.145306829 | 0.145199642 | 0.437107908 | 0.436785472 |
| <i>FAM214A</i>      | 0.397925277 | 0.768218593 | 0.984911885 | 1.930559929 | 2.475117674 |
| <i>FAM212A</i>      | 2.457466852 | 1.378528684 | 0.983937    | 0.560955149 | 0.400386683 |
| <i>SALL2</i>        | 2.938833074 | 5.66307411  | 6.420671248 | 1.926980529 | 2.18476895  |
| <i>SEC16B</i>       | 0.02117102  | 0.067862815 | 0.084765944 | 3.205457995 | 4.003866825 |
| <i>LRFN1</i>        | 3.80227289  | 7.841247518 | 8.154843652 | 2.062252696 | 2.144728663 |
| <i>PIK3C2A</i>      | 0.472731128 | 0.959165177 | 0.934294842 | 2.028986709 | 1.976376816 |
| <i>PLEKHH2</i>      | 0.036752452 | 0.107991072 | 0.137341796 | 2.938336495 | 3.73694237  |
| <i>LOC101928083</i> | 0.161830472 | 0.352002672 | 0.370255805 | 2.175132211 | 2.2879239   |
| <i>P2RY2</i>        | 0.009751853 | 0.015629577 | 0.039045119 | 1.602728997 | 4.003866825 |
| <i>P2RX6</i>        | 0.751143432 | 1.329283459 | 2.155359424 | 1.769679935 | 2.869437891 |
| <i>TLL2</i>         | 0.012581921 | 0.040330818 | 0.030225801 | 3.205457995 | 2.402320095 |
| <i>KRT9</i>         | 0.409220099 | 0.119248894 | 0.148951162 | 0.291405272 | 0.363987893 |
| <i>SPTBN2</i>       | 0.19153668  | 0.520533663 | 0.473469587 | 2.717670909 | 2.471952562 |
| <i>TLR5</i>         | 0.019661247 | 0.063023302 | 0.062976812 | 3.205457995 | 3.20309346  |
| <i>HOXA11</i>       | 0.096334924 | 0.257331293 | 0.179999029 | 2.671214996 | 1.868471185 |
| <i>EFNA2</i>        | 0.039753702 | 0.127428823 | 0.063667412 | 3.205457995 | 1.60154673  |
| <i>MEGF11</i>       | 0.086431029 | 0.230875861 | 0.219170275 | 2.671214996 | 2.535782323 |
| <i>LOC730268</i>    | 0.038015254 | 0.761601874 | 0.395740837 | 20.03411247 | 10.41005375 |
| <i>IL22RA1</i>      | 0.316378807 | 0.59926394  | 0.806106388 | 1.89413427  | 2.547915252 |
| <i>LYPD6B</i>       | 0.054159049 | 0.477412531 | 0.21684562  | 8.815009485 | 4.003866825 |
| <i>TMC3</i>         | 0.077377097 | 0.020669086 | 0.02065384  | 0.2671215   | 0.266924455 |
| <i>MYRF</i>         | 0.430989127 | 0.874961111 | 1.046877995 | 2.030123397 | 2.429012541 |
| <i>MYT1</i>         | 0.015391542 | 0.037002706 | 0.024650274 | 2.404093496 | 1.60154673  |
| <i>EDIL3</i>        | 1.503391486 | 3.313102552 | 5.202463534 | 2.203752371 | 3.460484899 |
| <i>KSR2</i>         | 0.080143165 | 0.156545725 | 0.184507471 | 1.953325966 | 2.302223424 |
| <i>ATP9A</i>        | 0.40460668  | 0.855626549 | 1.250993252 | 2.114711872 | 3.091874937 |
| <i>NOVA1</i>        | 0.616038654 | 1.051042564 | 1.6231403   | 1.706130868 | 2.634802685 |
| <i>NOVA2</i>        | 0.232917051 | 0.471072722 | 0.843752772 | 2.022491354 | 3.622546175 |
| <i>PCDH10</i>       | 0.444536183 | 0.928756879 | 1.029778269 | 2.089271729 | 2.316522949 |
| <i>PCDH18</i>       | 0.288493682 | 0.762922362 | 0.612197849 | 2.644502846 | 2.122049417 |
| <i>RGMA</i>         | 0.871193703 | 2.221366333 | 2.304288779 | 2.549796132 | 2.644978691 |
| <i>GGT1</i>         | 0.031847545 | 0.229693431 | 0.204021329 | 7.212280488 | 6.40618692  |
| <i>TMEM191C</i>     | 0.651814722 | 0.156702353 | 0.260977934 | 0.24040935  | 0.400386683 |
| <i>TMEM191B</i>     | 0.447035449 | 0.204707622 | 0.153417463 | 0.457922571 | 0.343188585 |
| <i>SYTL5</i>        | 0.035371469 | 0.08503632  | 0.113298123 | 2.404093496 | 3.20309346  |
| <i>METTL7B</i>      | 1.4707814   | 2.810583999 | 3.986273318 | 1.910946112 | 2.710309851 |
| <i>METTL7A</i>      | 0.022809152 | 0.03655689  | 0.073059847 | 1.602728997 | 3.20309346  |
| <i>INHA</i>         | 0.059533322 | 0.238539455 | 0.095345398 | 4.006822493 | 1.60154673  |
| <i>TNIK</i>         | 0.278789442 | 0.776062603 | 1.151485349 | 2.783687206 | 4.130304725 |
| <i>CEP350</i>       | 0.251100683 | 0.477905036 | 0.573063006 | 1.903240684 | 2.28220409  |
| <i>TNNI3</i>        | 1.717991852 | 3.563321052 | 4.774564993 | 2.074119879 | 2.77915462  |
| <i>HSF2BP</i>       | 1.525294504 | 0.862811905 | 0.538859653 | 0.565669058 | 0.353282367 |
| <i>TNSI</i>         | 0.911944362 | 0.451767172 | 0.398324048 | 0.495388963 | 0.436785472 |
| <i>TMEM52B</i>      | 0.030545781 | 0.269261352 | 0.244602481 | 8.815009485 | 8.00773365  |
| <i>EBF3</i>         | 0.199903444 | 0.026699254 | 0.053359118 | 0.13356075  | 0.266924455 |
| <i>RUNX2</i>        | 0.245466405 | 0.614712696 | 0.565118508 | 2.504264058 | 2.302223424 |
| <i>ILI7RD</i>       | 0.400559582 | 1.401413826 | 2.167068586 | 3.498640128 | 5.410102978 |
| <i>RHOJ</i>         | 0.047080511 | 0.282964874 | 0.207354505 | 6.01023374  | 4.404253508 |

|                     |             |             |             |             |             |
|---------------------|-------------|-------------|-------------|-------------|-------------|
| <i>RHOV</i>         | 0.299796543 | 0.720738918 | 0.560161201 | 2.404093496 | 1.868471185 |
| <i>KLAA0754</i>     | 3.478975856 | 6.710590987 | 7.380114941 | 1.928898407 | 2.121346985 |
| <i>ARHGAP44</i>     | 3.723154666 | 5.983248827 | 10.14638794 | 1.607037409 | 2.725212581 |
| <i>ARHGAP42</i>     | 0.215131778 | 0.330431358 | 0.617307276 | 1.535948622 | 2.869437891 |
| <i>CMPK2</i>        | 0.056530978 | 0.090603838 | 0.158439756 | 1.602728997 | 2.802706778 |
| <i>PBX1</i>         | 2.383166498 | 4.514037333 | 5.185385988 | 1.89413427  | 2.175838739 |
| <i>SNX10</i>        | 0.063128703 | 0.177061854 | 0.075827675 | 2.804775745 | 1.201160048 |
| <i>SLC18A3</i>      | 0.105610146 | 0.02821074  | 0.028189931 | 0.2671215   | 0.266924455 |
| <i>SNX32</i>        | 0.355894242 | 1.354704802 | 0.926219547 | 3.806481369 | 2.602513436 |
| <i>SNX22</i>        | 0.302512536 | 0.167831174 | 0.093170762 | 0.554790807 | 0.307989756 |
| <i>NOXA1</i>        | 0.667569858 | 1.646051645 | 2.508377066 | 2.465736919 | 3.757475021 |
| <i>ZNF891</i>       | 0.665852938 | 0.296439392 | 0.177732433 | 0.445202499 | 0.266924455 |
| <i>TRIM74</i>       | 0.063105322 | 0.101140729 | 0.252665304 | 1.602728997 | 4.003866825 |
| <i>ZNF878</i>       | 0.193398829 | 0.542440345 | 0.271020104 | 2.804775745 | 1.401353389 |
| <i>TM6SF1</i>       | 0.401639423 | 0.035762175 | 0.214414768 | 0.0890405   | 0.53384891  |
| <i>TM6SF2</i>       | 0.114891685 | 0.046035059 | 0.0460011   | 0.400682249 | 0.400386683 |
| <i>B4GALNT4</i>     | 6.980135532 | 15.75309311 | 14.81318008 | 2.256846309 | 2.122190897 |
| <i>ECM2</i>         | 0.051788562 | 0.145255302 | 0.248825406 | 2.804775745 | 4.80464019  |
| <i>PCLO</i>         | 0.075584548 | 0.188442407 | 0.131139868 | 2.493133996 | 1.735008958 |
| <i>MCF2L2</i>       | 0.067977007 | 0.122567311 | 0.231345251 | 1.803070122 | 3.403286801 |
| <i>SPINK6</i>       | 0.581119947 | 0.465688895 | 0.093069075 | 0.801364499 | 0.160154673 |
| <i>PCP2</i>         | 0.085534321 | 0.205632506 | 0.136987213 | 2.404093496 | 1.60154673  |
| <i>SYNGR3</i>       | 3.32295209  | 5.625367452 | 7.716701427 | 1.692882503 | 2.322242759 |
| <i>SARDH</i>        | 0.050349991 | 0.100871738 | 0.161275726 | 2.003411247 | 3.20309346  |
| <i>GJA3</i>         | 0.130913844 | 0.144250847 | 0.406225239 | 1.101876186 | 3.10299679  |
| <i>ARMC4</i>        | 0.023849996 | 0.305800636 | 0.248279736 | 12.82183198 | 10.41005375 |
| <i>AKAP17A</i>      | 0.312249912 | 1.021756141 | 0.687613884 | 3.27223837  | 2.202126754 |
| <i>GJB2</i>         | 0.255503552 | 0.175501265 | 0.029228634 | 0.686883856 | 0.114396195 |
| <i>LOC101928485</i> | 0.095685718 | 0.230037412 | 0.153245149 | 2.404093496 | 1.60154673  |
| <i>GLT8D2</i>       | 0.039977562 | 0.25629279  | 0.064025933 | 6.410915989 | 1.60154673  |
| <i>ZNF732</i>       | 0.660404529 | 0.34243954  | 0.27997113  | 0.51852997  | 0.42393884  |
| <i>ZNF813</i>       | 0.101709867 | 0.260821364 | 0.276918277 | 2.564366396 | 2.722629441 |
| <i>ZNF805</i>       | 0.067305696 | 0.276424024 | 0.229060585 | 4.106993056 | 3.403286801 |
| <i>VWA2</i>         | 0.029090724 | 0.011656137 | 0.011647538 | 0.400682249 | 0.400386683 |
| <i>FAM86B2</i>      | 0.476200023 | 1.030346441 | 1.029586397 | 2.163684146 | 2.162088086 |
| <i>IQCG</i>         | 0.565935679 | 1.239623415 | 1.208496581 | 2.190396296 | 2.13539564  |
| <i>SLC16A9</i>      | 0.02136749  | 0.102738889 | 0.359320861 | 4.808186992 | 16.81624067 |
| <i>KLAA0408</i>     | 0.04194593  | 0.058824464 | 0.109164847 | 1.402387873 | 2.602513436 |
| <i>LOC101928170</i> | 0.433879217 | 1.060470973 | 1.007572869 | 2.444161721 | 2.322242759 |
| <i>NRARP</i>        | 0.650073897 | 1.562838428 | 1.119208003 | 2.404093496 | 1.721662735 |
| <i>IQUB</i>         | 0.024236752 | 0.038844946 | 0.058224437 | 1.602728997 | 2.402320095 |
| <i>CKMT2</i>        | 0.18723557  | 0.337598861 | 0.412316457 | 1.803070122 | 2.202126754 |
| <i>C2orf88</i>      | 0.020361421 | 0.065267679 | 0.04891465  | 3.205457995 | 2.402320095 |
| <i>C2orf72</i>      | 0.047580108 | 0.171580544 | 0.114302651 | 3.606140244 | 2.402320095 |
| <i>ZNF610</i>       | 0.150516226 | 0.271391311 | 0.331455809 | 1.803070122 | 2.202126754 |
| <i>SRGAP2D</i>      | 0.026722768 | 0.17131742  | 0.149792166 | 6.410915989 | 5.605413555 |
| <i>THAP9</i>        | 0.105488093 | 0.338137652 | 0.118260878 | 3.205457995 | 1.121082711 |
| <i>ZNF714</i>       | 0.154754195 | 0.341039924 | 0.348533542 | 2.203752371 | 2.252175089 |
| <i>ZNF704</i>       | 0.035359235 | 0.165291209 | 0.188764892 | 4.674626242 | 5.3384891   |

|                     |             |             |             |             |             |
|---------------------|-------------|-------------|-------------|-------------|-------------|
| <i>C2orf48</i>      | 0.936177848 | 0.187554923 | 0.655958    | 0.200341125 | 0.700676694 |
| <i>TMEM150C</i>     | 0.135368937 | 0.506239347 | 0.758798873 | 3.739700994 | 5.605413555 |
| <i>ESYT3</i>        | 0.034462858 | 0.069043277 | 0.124186223 | 2.003411247 | 3.603480143 |
| <i>HIST4H4</i>      | 0.413554292 | 0.994223184 | 0.827908156 | 2.404093496 | 2.001933413 |
| <i>IRF5</i>         | 0.114775593 | 0.229942715 | 0.298705024 | 2.003411247 | 2.602513436 |
| <i>MILR1</i>        | 0.630334886 | 0.310848    | 0.271791363 | 0.493147384 | 0.431185658 |
| <i>PIH1D2</i>       | 0.252234446 | 0.909592787 | 0.555452222 | 3.606140244 | 2.202126754 |
| <i>GLI2</i>         | 0.176198933 | 0.292484823 | 0.423286238 | 1.659969319 | 2.402320095 |
| <i>ZNF596</i>       | 0.394669285 | 0.27109196  | 0.112871661 | 0.686883856 | 0.285990488 |
| <i>SULF1</i>        | 0.014904161 | 0.083605658 | 0.155153117 | 5.609551491 | 10.41005375 |
| <i>SULF2</i>        | 0.020026371 | 0.064193693 | 0.064146339 | 3.205457995 | 3.20309346  |
| <i>PHLDA2</i>       | 11.85282563 | 4.229771242 | 4.968168853 | 0.356857628 | 0.419154808 |
| <i>C19orf73</i>     | 0.57252812  | 1.284650387 | 1.283702753 | 2.243820596 | 2.242165422 |
| <i>SMPDL3A</i>      | 0.113388    | 0.666344199 | 0.696118694 | 5.87667299  | 6.139262465 |
| <i>ZNF501</i>       | 0.075569649 | 0.141303946 | 0.221885261 | 1.869850497 | 2.936169005 |
| <i>EDNRB</i>        | 0.019054391 | 0.32065977  | 0.534038721 | 16.82865447 | 28.02706778 |
| <i>C19orf38</i>     | 0.058270988 | 0.233481505 | 0.18664742  | 4.006822493 | 3.20309346  |
| <i>KRT32</i>        | 0.084979735 | 0.374548584 | 0.476346558 | 4.407504743 | 5.605413555 |
| <i>CA12</i>         | 10.50167805 | 19.61366814 | 23.92406718 | 1.867669913 | 2.278118512 |
| <i>CA11</i>         | 8.324307798 | 16.75836314 | 18.6319586  | 2.013183984 | 2.238259211 |
| <i>KRT16</i>        | 1.239700003 | 0.119214189 | 0.119126249 | 0.09616374  | 0.096092804 |
| <i>KRT86</i>        | 0.218534889 | 0.058375367 | 0.145830765 | 0.2671215   | 0.667311138 |
| <i>ISLR</i>         | 0.074241555 | 0.535450917 | 0.237802639 | 7.212280488 | 3.20309346  |
| <i>ZNF493</i>       | 0.015048964 | 0.108537348 | 0.060254047 | 7.212280488 | 4.003866825 |
| <i>ZNF492</i>       | 0.02006883  | 0.112577136 | 0.048211754 | 5.609551491 | 2.402320095 |
| <i>ZNF483</i>       | 0.137075115 | 0.45769638  | 0.311003954 | 3.339018744 | 2.268857868 |
| <i>ISPD</i>         | 0.200488486 | 0.024717593 | 0.07409808  | 0.123286846 | 0.369587707 |
| <i>ZNF469</i>       | 0.109692277 | 0.305076841 | 0.366855554 | 2.781206201 | 3.344406407 |
| <i>NUDT13</i>       | 0.409086119 | 0.163913546 | 0.136493862 | 0.400682249 | 0.333655569 |
| <i>NAAA</i>         | 0.868841385 | 0.109935575 | 0.29294528  | 0.126531237 | 0.337167733 |
| <i>ZNF417</i>       | 0.380403119 | 0.87097587  | 0.681761153 | 2.289612853 | 1.792207055 |
| <i>ZNF404</i>       | 0.075059193 | 0.481198181 | 0.360632416 | 6.410915989 | 4.80464019  |
| <i>EGR3</i>         | 0.019463602 | 0.093584636 | 0.062343735 | 4.808186992 | 3.20309346  |
| <i>LOC101060389</i> | 0.025560211 | 0.102415229 | 0.143275555 | 4.006822493 | 5.605413555 |
| <i>MAP1LC3C</i>     | 0.071469953 | 0.229093933 | 0.286156175 | 3.205457995 | 4.003866825 |
| <i>AKR7A3</i>       | 0.068648013 | 0.275060403 | 0.164914501 | 4.006822493 | 2.402320095 |
| <i>GNG2</i>         | 0.241151319 | 0.421636595 | 0.702209285 | 1.748431633 | 2.911903146 |
| <i>ZNF396</i>       | 0.061113475 | 0.122435423 | 0.195752172 | 2.003411247 | 3.20309346  |
| <i>RBPM52</i>       | 1.36580656  | 3.42034028  | 3.93048982  | 2.504264058 | 2.877779281 |
| <i>RNLS</i>         | 0.282093325 | 0.028257447 | 0.141183013 | 0.100170562 | 0.500483353 |
| <i>TUBB4A</i>       | 13.72021462 | 30.63054107 | 32.55936982 | 2.232511803 | 2.37309479  |
| <i>ZNF33B</i>       | 0.209901899 | 0.437340619 | 0.403401241 | 2.083547697 | 1.921856076 |
| <i>SERF1B</i>       | 1.164561929 | 0.39483171  | 0.430407773 | 0.339038826 | 0.369587707 |
| <i>PHIP</i>         | 0.505485967 | 1.095423572 | 0.99769644  | 2.167070194 | 1.973737167 |
| <i>CEACAM19</i>     | 0.037896879 | 0.212584495 | 0.060693623 | 5.609551491 | 1.60154673  |
| <i>MAATS1</i>       | 0.057653181 | 0.169404447 | 0.184668528 | 2.938336495 | 3.20309346  |
| <i>RAET1E</i>       | 1.095849916 | 0.520400129 | 0.390012189 | 0.474882666 | 0.355899273 |
| <i>ROBO1</i>        | 7.798483902 | 17.38179139 | 18.10633148 | 2.228868023 | 2.321775835 |
| <i>CBY3</i>         | 0.071590071 | 0.172109223 | 0.171982266 | 2.404093496 | 2.402320095 |

|                     |             |             |             |             |             |
|---------------------|-------------|-------------|-------------|-------------|-------------|
| <i>YBX2</i>         | 0.269084599 | 1.121301195 | 0.603332185 | 4.167095393 | 2.242165422 |
| <i>THBS2</i>        | 2.057012439 | 6.465972714 | 5.22000245  | 3.143380463 | 2.537662072 |
| <i>TCF7L1</i>       | 1.45977012  | 3.345650738 | 2.524921267 | 2.291902466 | 1.729670468 |
| <i>ZNF284</i>       | 0.231500501 | 0.463790706 | 0.834207457 | 2.003411247 | 3.603480143 |
| <i>FERMT3</i>       | 0.066765035 | 0.133757821 | 0.160390984 | 2.003411247 | 2.402320095 |
| <i>LRRC6</i>        | 0.049907548 | 0.119982411 | 0.099911588 | 2.404093496 | 2.001933413 |
| <i>ZNF234</i>       | 0.425960921 | 0.712382525 | 1.02329448  | 1.672412867 | 2.402320095 |
| <i>ZNF233</i>       | 0.091506105 | 0.342205474 | 0.293102608 | 3.739700994 | 3.20309346  |
| <i>ZNF221</i>       | 0.10534895  | 0.393973573 | 0.421803166 | 3.739700994 | 4.003866825 |
| <i>ATXN1</i>        | 0.816999134 | 1.694554145 | 2.007591653 | 2.074119879 | 2.45727513  |
| <i>HUS1B</i>        | 0.249099954 | 0.133079906 | 0.066490869 | 0.534242999 | 0.266924455 |
| <i>C9orf47</i>      | 0.052201093 | 0.069720172 | 0.153271232 | 1.335607498 | 2.936169005 |
| <i>CXXC5</i>        | 0.465107466 | 0.99392163  | 0.900077037 | 2.136971996 | 1.935202299 |
| <i>ADHFE1</i>       | 0.674344466 | 1.116817811 | 1.763990485 | 1.656153297 | 2.615859659 |
| <i>LRRN1</i>        | 0.021097619 | 0.084534413 | 0.033788822 | 4.006822493 | 1.60154673  |
| <i>FAM57B</i>       | 0.201590592 | 0.581571157 | 0.839427559 | 2.884912195 | 4.164021498 |
| <i>CD37</i>         | 1.553862202 | 3.627350882 | 2.596782186 | 2.334409627 | 1.671179197 |
| <i>CD72</i>         | 0.220134843 | 0.44102062  | 0.749182005 | 2.003411247 | 3.403286801 |
| <i>RUNDC3A</i>      | 0.254443124 | 0.055609551 | 0.16670559  | 0.218553954 | 0.655178208 |
| <i>RASGRP3</i>      | 0.159602343 | 0.014211072 | 0.127805306 | 0.0890405   | 0.800773365 |
| <i>ZNF135</i>       | 0.318901224 | 0.109524051 | 0.05472163  | 0.343441928 | 0.171594293 |
| <i>ZNF121</i>       | 0.439890796 | 0.822530024 | 0.978480092 | 1.869850497 | 2.224370458 |
| <i>ZNF112</i>       | 0.068427457 | 0.32901201  | 0.273974426 | 4.808186992 | 4.003866825 |
| <i>ATP6AP1L</i>     | 0.224781489 | 0.450329762 | 1.349992718 | 2.003411247 | 6.005800238 |
| <i>GPR4</i>         | 0.16770115  | 0.627152157 | 0.738598378 | 3.739700994 | 4.404253508 |
| <i>CDH4</i>         | 0.379329547 | 0.041928446 | 0.125692551 | 0.110533034 | 0.331354496 |
| <i>CDH3</i>         | 14.36472517 | 27.20581533 | 30.71159767 | 1.893932185 | 2.13798714  |
| <i>CDH1</i>         | 0.035386162 | 0.141786068 | 0.042504444 | 4.006822493 | 1.201160048 |
| <i>LOC101060321</i> | 0.181646448 | 0.058226006 | 0.11636611  | 0.320545799 | 0.640618692 |
| <i>LSMEM1</i>       | 0.079955124 | 0.032036599 | 0.032012967 | 0.400682249 | 0.400386683 |
| <i>LOC100653515</i> | 0.26247592  | 0.120193648 | 0.030026246 | 0.457922571 | 0.114396195 |
| <i>PTPN13</i>       | 0.923627084 | 2.172733482 | 2.051837848 | 2.352392561 | 2.221500303 |
| <i>FAM63B</i>       | 0.169942518 | 0.367701932 | 0.353822149 | 2.163684146 | 2.082010749 |
| <i>LOC101928641</i> | 0.181517438 | 0.549521716 | 0.468363951 | 3.027376995 | 2.580269732 |
| <i>RDH10</i>        | 10.40449587 | 20.91339144 | 30.53788221 | 2.010034094 | 2.935066012 |
| <i>NEBL</i>         | 0.044104465 | 0.070687505 | 0.155397795 | 1.602728997 | 3.523402806 |
| <i>PKIA</i>         | 0.567812701 | 1.088809679 | 1.575173603 | 1.917550765 | 2.774107729 |
| <i>KCNC1</i>        | 1.028679002 | 2.151344174 | 2.290395538 | 2.091365887 | 2.226540576 |
| <i>KIAA2018</i>     | 0.186443356 | 0.512971197 | 0.527522687 | 2.751351445 | 2.829399223 |
| <i>PKLR</i>         | 0.080092934 | 0.256734536 | 0.192408865 | 3.205457995 | 2.402320095 |
| <i>NEO1</i>         | 0.138205517 | 0.29534132  | 0.322791283 | 2.136971996 | 2.335588981 |
| <i>KCNJ4</i>        | 0.99012708  | 1.917510671 | 2.378602182 | 1.936630872 | 2.402320095 |
| <i>COL26A1</i>      | 0.337061065 | 1.035416957 | 0.472341666 | 3.071897245 | 1.401353389 |
| <i>KCNK1</i>        | 0.197112874 | 0.379102223 | 0.631370958 | 1.923274797 | 3.20309346  |
| <i>SLC23A3</i>      | 0.0352325   | 0.084702223 | 0.084639742 | 2.404093496 | 2.402320095 |
| <i>SOAT2</i>        | 0.32876868  | 0.065865887 | 0.098725951 | 0.200341125 | 0.300290012 |
| <i>KCNQ2</i>        | 0.110843132 | 0.688399572 | 0.451197826 | 6.210574865 | 4.070597939 |
| <i>NTNG2</i>        | 0.156795431 | 0.104708577 | 0.041852535 | 0.667803749 | 0.266924455 |
| <i>KCNS2</i>        | 0.026891472 | 0.064649614 | 0.04306795  | 2.404093496 | 1.60154673  |

|                     |             |             |             |             |             |
|---------------------|-------------|-------------|-------------|-------------|-------------|
| <i>PLAT</i>         | 61.29648803 | 138.756123  | 248.9489817 | 2.263687977 | 4.061390624 |
| <i>PLBI</i>         | 0.049645795 | 0.013261459 | 0.013251677 | 0.2671215   | 0.266924455 |
| <i>ADAMI2</i>       | 7.49419861  | 14.86530869 | 16.00873783 | 1.983575492 | 2.13615073  |
| <i>CARD14</i>       | 0.061201282 | 0.245222672 | 0.147025069 | 4.006822493 | 2.402320095 |
| <i>PIBF1</i>        | 0.355651379 | 0.789248462 | 0.722944077 | 2.219163227 | 2.032732388 |
| <i>GRM2</i>         | 0.25362365  | 0.121946994 | 0.040619013 | 0.480818699 | 0.160154673 |
| <i>ELF3</i>         | 0.157374725 | 0.44140081  | 0.609103857 | 2.804775745 | 3.870404598 |
| <i>HS3ST1</i>       | 0.346838409 | 1.007546955 | 1.527564279 | 2.904946308 | 4.404253508 |
| <i>ST3GAL6</i>      | 0.095426698 | 0.286768379 | 0.267453052 | 3.00511687  | 2.802706778 |
| <i>LRRC37A2</i>     | 0.049386773 | 0.13192269  | 0.171372989 | 2.671214996 | 3.470017915 |
| <i>PLLP</i>         | 0.569086067 | 1.003299815 | 1.321555998 | 1.763001897 | 2.322242759 |
| <i>PLP1</i>         | 0.02717454  | 0.065330136 | 0.369931019 | 2.404093496 | 13.61314721 |
| <i>IL13RA2</i>      | 3.722892245 | 1.541420067 | 1.391223377 | 0.414038324 | 0.373694237 |
| <i>APOA1</i>        | 0.091114636 | 0.146032068 | 0.364810866 | 1.602728997 | 4.003866825 |
| <i>CEBPA</i>        | 0.71236338  | 1.530950029 | 1.607608204 | 2.149113883 | 2.256724938 |
| <i>CEBPE</i>        | 0.385484996 | 0.17652228  | 0.176392067 | 0.457922571 | 0.45758478  |
| <i>APOBR</i>        | 0.06739888  | 0.01800369  | 0.035980819 | 0.2671215   | 0.53384891  |
| <i>NIPAL1</i>       | 0.116488857 | 0.062233356 | 0.031093725 | 0.534242999 | 0.266924455 |
| <i>SLC22A4</i>      | 1.632331996 | 0.622901387 | 0.466831423 | 0.381602142 | 0.285990488 |
| <i>FAM43B</i>       | 0.032994649 | 0.158644443 | 0.079263709 | 4.808186992 | 2.402320095 |
| <i>FAM46B</i>       | 8.899604752 | 4.85995217  | 3.879380927 | 0.54609113  | 0.435904856 |
| <i>PMCH</i>         | 0.675235278 | 0.36073972  | 0.180236808 | 0.534242999 | 0.266924455 |
| <i>NGEF</i>         | 0.535126785 | 0.879104796 | 1.671209578 | 1.642797222 | 3.123016124 |
| <i>GRIN2A</i>       | 0.058017015 | 0.158075438 | 0.102208656 | 2.724639295 | 1.761701403 |
| <i>PRKAR2B</i>      | 0.442133707 | 0.988339135 | 1.024878383 | 2.235385181 | 2.318028162 |
| <i>GLYATL2</i>      | 0.061733467 | 0.346297061 | 0.346041612 | 5.609551491 | 5.605413555 |
| <i>GRIN3A</i>       | 0.010962834 | 0.026355678 | 0.017557491 | 2.404093496 | 1.60154673  |
| <i>AADAT</i>        | 0.549390698 | 0.234806507 | 0.087987488 | 0.427394399 | 0.160154673 |
| <i>FAM13C</i>       | 0.024011326 | 0.057725472 | 0.03845526  | 2.404093496 | 1.60154673  |
| <i>LAG3</i>         | 0.042767161 | 0.137088337 | 0.205480819 | 3.205457995 | 4.80464019  |
| <i>ST6GALNAC2</i>   | 0.121414039 | 0.291890702 | 0.486125644 | 2.404093496 | 4.003866825 |
| <i>SLC47A2</i>      | 0.074382    | 0.039738063 | 0.019854375 | 0.534242999 | 0.266924455 |
| <i>CECR6</i>        | 0.016953668 | 0.095102476 | 0.027152092 | 5.609551491 | 1.60154673  |
| <i>BAIAP3</i>       | 0.054598708 | 0.145844888 | 0.116589843 | 2.671214996 | 2.13539564  |
| <i>GREB1L</i>       | 0.079147309 | 0.380555059 | 0.324817665 | 4.808186992 | 4.103963496 |
| <i>CRIP3</i>        | 0.160942413 | 0.988797113 | 0.42959466  | 6.14379449  | 2.66924455  |
| <i>CRIP1</i>        | 20.7655949  | 8.960436447 | 8.243205535 | 0.431503961 | 0.396964574 |
| <i>FAM171B</i>      | 0.093515021 | 0.312248408 | 0.436825306 | 3.339018744 | 4.671177963 |
| <i>RTL1</i>         | 0.040635432 | 0.048845689 | 0.16269886  | 1.202046748 | 4.003866825 |
| <i>FAM174B</i>      | 1.392876015 | 2.777524389 | 6.873841249 | 1.994093055 | 4.934998645 |
| <i>CHD2</i>         | 2.256264596 | 4.082784655 | 5.595117192 | 1.809532739 | 2.479814292 |
| <i>CHDH</i>         | 0.558074273 | 1.032048254 | 1.443801736 | 1.849302689 | 2.587113949 |
| <i>LOC101928991</i> | 0.064686548 | 0.31102502  | 0.41439412  | 4.808186992 | 6.40618692  |
| <i>RNF125</i>       | 0.014468781 | 0.104352909 | 0.104275932 | 7.212280488 | 7.206960285 |
| <i>RNF157</i>       | 0.980604705 | 1.792225153 | 2.617473765 | 1.827673418 | 2.66924455  |
| <i>RNF152</i>       | 0.01894844  | 0.007592303 | 0.007586703 | 0.400682249 | 0.400386683 |
| <i>LOC102723563</i> | 1.959275105 | 1.046729008 | 0.813522017 | 0.534242999 | 0.415215819 |
| <i>LOC102723565</i> | 0.17529256  | 0.561892938 | 0.561478453 | 3.205457995 | 3.20309346  |
| <i>IQCA1</i>        | 0.076451257 | 0.081687098 | 0.285693942 | 1.068485998 | 3.73694237  |

|                            |             |             |             |             |             |
|----------------------------|-------------|-------------|-------------|-------------|-------------|
| <i>CHRD</i>                | 0.169368159 | 0.329619388 | 0.484376825 | 1.946170925 | 2.859904875 |
| <i>LOC102723588</i>        | 0.112242667 | 0.269841866 | 0.179761876 | 2.404093496 | 1.60154673  |
| <i>KCNAB3</i>              | 0.060960418 | 0.146554545 | 0.122038698 | 2.404093496 | 2.001933413 |
| <i>B3GNT8</i>              | 0.136380231 | 0.072860184 | 0.036403219 | 0.534242999 | 0.266924455 |
| <i>B3GNT7</i>              | 0.070503877 | 0.169497911 | 0.301107341 | 2.404093496 | 4.27079128  |
| <i>OVOS2</i>               | 0.073919466 | 0.236945742 | 0.251569142 | 3.205457995 | 3.403286801 |
| <i>FAM186B</i>             | 0.027375381 | 0.175501265 | 0.153450329 | 6.410915989 | 5.605413555 |
| <i>PTCH2</i>               | 0.03964271  | 0.127073042 | 0.174596545 | 3.205457995 | 4.404253508 |
| <i>POLK</i>                | 0.260925526 | 0.62728936  | 0.522355528 | 2.404093496 | 2.001933413 |
| <i>RNF207</i>              | 1.308668657 | 2.69916614  | 2.61127778  | 2.0625283   | 1.995369696 |
| <i>NRIP1</i>               | 0.284484561 | 0.736537288 | 0.709708476 | 2.589023765 | 2.494717022 |
| <i>POLN</i>                | 0.029386749 | 0.070648491 | 0.094128502 | 2.404093496 | 3.20309346  |
| <i>LCA5</i>                | 0.018053016 | 0.144670464 | 0.144563747 | 8.013644987 | 8.00773365  |
| <i>CCDC169-<br/>SOHLH2</i> | 0.257183952 | 0.077286783 | 0.025743257 | 0.300511687 | 0.100096671 |
| <i>ACHE</i>                | 0.432155145 | 0.669539996 | 1.153527765 | 1.549304697 | 2.66924455  |
| <i>YPEL3</i>               | 3.057905856 | 6.104747394 | 7.646784949 | 1.996381734 | 2.500660684 |
| <i>CRLF1</i>               | 0.047224049 | 0.491967791 | 0.378157605 | 10.41773848 | 8.00773365  |
| <i>YPEL2</i>               | 0.03256582  | 0.078291275 | 0.104311364 | 2.404093496 | 3.20309346  |
| <i>LCN2</i>                | 0.207280254 | 0.747481664 | 0.580945771 | 3.606140244 | 2.802706778 |
| <i>TTC39A</i>              | 0.087826994 | 0.258065262 | 0.117215863 | 2.938336495 | 1.334622275 |
| <i>KALRN</i>               | 0.010609238 | 0.017003734 | 0.025486787 | 1.602728997 | 2.402320095 |
| <i>EPGN</i>                | 0.123154585 | 0.024672928 | 0.073964184 | 0.200341125 | 0.600580024 |
| <i>SCNN1D</i>              | 0.306848077 | 0.692982892 | 1.005200865 | 2.25839086  | 3.275891039 |
| <i>SCNN1A</i>              | 0.04894696  | 0.176509603 | 0.137183977 | 3.606140244 | 2.802706778 |
| <i>HHIPL2</i>              | 0.463360753 | 0.954825063 | 1.033630788 | 2.060651568 | 2.230725803 |
| <i>ADD2</i>                | 2.419879959 | 0.928166922 | 1.093104082 | 0.383559076 | 0.451718308 |
| <i>AGPAT4</i>              | 1.070443741 | 2.304837907 | 2.095335823 | 2.153161178 | 1.957446003 |
| <i>LDHD</i>                | 0.287811433 | 0.626027919 | 1.28405678  | 2.175132211 | 4.461451605 |
| <i>C10orf54</i>            | 4.389877946 | 10.43927401 | 8.988300908 | 2.378032862 | 2.047505881 |
| <i>TP53TG5</i>             | 0.450071917 | 1.030490445 | 0.97824378  | 2.289612853 | 2.173527705 |
| <i>ICOSLG</i>              | 0.154754195 | 0.041338173 | 0.082615358 | 0.2671215   | 0.53384891  |
| <i>MCF2L</i>               | 0.02447348  | 0.068642623 | 0.19597711  | 2.804775745 | 8.00773365  |
| <i>PGAP1</i>               | 0.276282831 | 0.616338783 | 0.723514372 | 2.230825496 | 2.618745329 |
| <i>NYAP1</i>               | 0.303175033 | 0.60738427  | 0.867051754 | 2.003411247 | 2.859904875 |
| <i>RHBDL1</i>              | 0.473582247 | 1.349376    | 1.05342236  | 2.849295995 | 2.224370458 |
| <i>VAMP7</i>               | 0.73690118  | 1.258078077 | 2.668236829 | 1.707254802 | 3.620888259 |
| <i>LRRC29</i>              | 0.637926498 | 1.161844656 | 2.229096213 | 1.821282952 | 3.494283775 |
| <i>LEPR</i>                | 0.315219377 | 1.023717504 | 0.983106674 | 3.247635074 | 3.118801527 |
| <i>IFI16</i>               | 0.079519774 | 0.488553147 | 0.169806178 | 6.14379449  | 2.13539564  |
| <i>SH3BP1</i>              | 8.59859002  | 16.21942356 | 18.88221958 | 1.886288743 | 2.195966959 |
| <i>IFI27</i>               | 0.116861707 | 0.374595292 | 0.842217679 | 3.205457995 | 7.206960285 |
| <i>PDZRN3</i>              | 1.760761317 | 3.609564584 | 4.951292686 | 2.050002206 | 2.812018096 |
| <i>HIST2H4B</i>            | 0.215131778 | 0.517196909 | 0.344543596 | 2.404093496 | 1.60154673  |
| <i>AKR1C3</i>              | 1.252826238 | 2.733030725 | 3.121159635 | 2.181492246 | 2.491294913 |
| <i>AKR1C2</i>              | 0.047250241 | 0.113593997 | 0.359448976 | 2.404093496 | 7.607346968 |
| <i>CLGN</i>                | 0.07754143  | 0.124277898 | 0.227674743 | 1.602728997 | 2.936169005 |
| <i>AFF3</i>                | 0.036025873 | 0.129914352 | 0.07933354  | 3.606140244 | 2.202126754 |
| <i>CRMP1</i>               | 0.320701957 | 0.624140825 | 0.917177091 | 1.946170925 | 2.859904875 |
| <i>PTHLH</i>               | 0.360411144 | 0.902564675 | 1.406962268 | 2.504264058 | 3.903770155 |

|                  |             |             |             |             |             |
|------------------|-------------|-------------|-------------|-------------|-------------|
| <i>PRTG</i>      | 0.040525894 | 0.086602701 | 0.086538818 | 2.136971996 | 2.13539564  |
| <i>CLMN</i>      | 0.080180879 | 0.165989784 | 0.278229087 | 2.070191622 | 3.470017915 |
| <i>ACOT6</i>     | 0.424263866 | 0.271992    | 0.067947841 | 0.641091599 | 0.160154673 |
| <i>C17orf72</i>  | 0.027410613 | 0.043931784 | 0.15364782  | 1.602728997 | 5.605413555 |
| <i>GYG2</i>      | 0.777896233 | 2.131552032 | 1.768285012 | 2.740149576 | 2.273163101 |
| <i>C2orf27A</i>  | 0.298710323 | 0.095750339 | 0.047839854 | 0.320545799 | 0.160154673 |
| <i>PSD3</i>      | 0.481105858 | 0.911279092 | 1.074049139 | 1.89413427  | 2.232459078 |
| <i>NTSR1</i>     | 1.113353811 | 0.165222633 | 0.561342567 | 0.148400833 | 0.504190637 |
| <i>DNASE1L2</i>  | 0.145379154 | 0.388338976 | 0.232831509 | 2.671214996 | 1.60154673  |
| <i>MYH14</i>     | 0.024650516 | 0.029631073 | 0.069088169 | 1.202046748 | 2.802706778 |
| <i>NCAM2</i>     | 0.11908745  | 0.310155476 | 0.238405144 | 2.604434621 | 2.001933413 |
| <i>LGI4</i>      | 0.058997357 | 0.496423072 | 0.094487025 | 8.414327236 | 1.60154673  |
| <i>LYPD6</i>     | 0.228397277 | 0.599005535 | 0.315908605 | 2.62264745  | 1.383153994 |
| <i>JAK3</i>      | 0.093361298 | 0.423959768 | 0.535788891 | 4.541065492 | 5.738875783 |
| <i>CCDC7</i>     | 0.151198907 | 0.10770261  | 0.026905791 | 0.712323999 | 0.177949637 |
| <i>ARL17A</i>    | 0.145379154 | 0.310671181 | 0.362182347 | 2.136971996 | 2.491294913 |
| <i>PTK6</i>      | 0.033606384 | 0.053861927 | 0.134555487 | 1.602728997 | 4.003866825 |
| <i>NEK10</i>     | 0.085499984 | 0.191846625 | 0.191705108 | 2.243820596 | 2.242165422 |
| <i>SLFN13</i>    | 0.040237187 | 0.112856286 | 0.112773037 | 2.804775745 | 2.802706778 |
| <i>C6orf165</i>  | 0.038461483 | 0.061643334 | 0.277190378 | 1.602728997 | 7.206960285 |
| <i>PTX3</i>      | 0.395629338 | 0.951129919 | 1.337639843 | 2.404093496 | 3.381043097 |
| <i>BNIP1</i>     | 0.105960428 | 0.028304308 | 0.056566859 | 0.2671215   | 0.53384891  |
| <i>MRGPRF</i>    | 0.149263573 | 0.478458113 | 0.328697307 | 3.205457995 | 2.202126754 |
| <i>UBN2</i>      | 0.076675325 | 0.132342826 | 0.188921717 | 1.726015843 | 2.463918046 |
| <i>LHX6</i>      | 0.165974197 | 0.475020818 | 0.360749515 | 2.862016067 | 2.173527705 |
| <i>LHX9</i>      | 0.066582403 | 0.146731128 | 0.159952244 | 2.203752371 | 2.402320095 |
| <i>IFIT2</i>     | 0.609386153 | 1.074348944 | 1.502979017 | 1.763001897 | 2.466381964 |
| <i>GDPD1</i>     | 0.181535857 | 0.27017044  | 0.539942293 | 1.488248355 | 2.97430107  |
| <i>GDPD3</i>     | 0.129373097 | 0.570212537 | 0.880587505 | 4.407504743 | 6.806573603 |
| <i>GDPD5</i>     | 0.617334668 | 1.269038918 | 1.246609533 | 2.055674149 | 2.019341529 |
| <i>ZDHHC19</i>   | 0.572186312 | 1.426537146 | 1.323664502 | 2.493133996 | 2.313345277 |
| <i>KISS1R</i>    | 0.157277879 | 0.042012303 | 0.041981312 | 0.2671215   | 0.266924455 |
| <i>COLQ</i>      | 0.081549634 | 0.174269284 | 0.261211099 | 2.136971996 | 3.20309346  |
| <i>ARHGDI3</i>   | 0.361750251 | 0.724734522 | 0.724199915 | 2.003411247 | 2.001933413 |
| <i>LIG4</i>      | 0.308947178 | 0.727264194 | 0.896812932 | 2.354008215 | 2.902803448 |
| <i>ZSCAN1</i>    | 0.285400952 | 0.781426486 | 0.876075676 | 2.73799537  | 3.069631233 |
| <i>NOS3</i>      | 0.038374858 | 0.015376124 | 0.015364782 | 0.400682249 | 0.400386683 |
| <i>SAMD14</i>    | 0.77424735  | 1.340981959 | 1.97998932  | 1.731981336 | 2.557308488 |
| <i>SAMD11</i>    | 8.439163117 | 18.44412469 | 16.42720191 | 2.185539542 | 1.946543951 |
| <i>NOX5</i>      | 0.028069912 | 0.134965388 | 0.112388191 | 4.808186992 | 4.003866825 |
| <i>NOX1</i>      | 0.168430574 | 0.107979426 | 0.053949887 | 0.641091599 | 0.320309346 |
| <i>C20orf195</i> | 0.912773402 | 1.706749799 | 3.228250444 | 1.869850497 | 3.536749029 |
| <i>FOXO4</i>     | 1.119610545 | 2.120692702 | 2.934177721 | 1.89413427  | 2.620712831 |
| <i>FOXO1</i>     | 0.66811577  | 2.117821292 | 2.544266513 | 3.169841795 | 3.808122225 |
| <i>CPA4</i>      | 7.258120059 | 30.58456865 | 29.83549402 | 4.213841656 | 4.110636607 |
| <i>C7orf61</i>   | 0.084852773 | 0.33999     | 0.475634885 | 4.006822493 | 5.605413555 |
| <i>PVRIG</i>     | 0.214589885 | 0.028660786 | 0.114558576 | 0.13356075  | 0.53384891  |
| <i>SLC25A27</i>  | 0.100432873 | 0.26157085  | 0.241271908 | 2.604434621 | 2.402320095 |
| <i>SFRP2</i>     | 2.525798426 | 7.959114643 | 5.999213871 | 3.151128198 | 2.375175235 |

|                  |             |             |             |             |             |
|------------------|-------------|-------------|-------------|-------------|-------------|
| <i>C20orf26</i>  | 0.080275321 | 0.016082448 | 0.048211754 | 0.200341125 | 0.600580024 |
| <i>PILRA</i>     | 0.194207107 | 0.622522723 | 0.259193131 | 3.205457995 | 1.334622275 |
| <i>SBSPON</i>    | 0.74021645  | 1.923351538 | 1.095681294 | 2.598363678 | 1.480217432 |
| <i>FOXBI</i>     | 0.817471267 | 0.421130862 | 0.37406241  | 0.515162892 | 0.45758478  |
| <i>FOXA1</i>     | 0.025204788 | 0.060594667 | 0.343116492 | 2.404093496 | 13.61314721 |
| <i>SAMD9L</i>    | 0.011943388 | 0.047855034 | 0.038255787 | 4.006822493 | 3.20309346  |
| <i>RPGRIP1L</i>  | 0.509885282 | 0.993901533 | 1.125590823 | 1.949264997 | 2.207537385 |
| <i>NPNT</i>      | 0.19766168  | 0.532796816 | 0.805800336 | 2.695498768 | 4.076664404 |
| <i>NPRI</i>      | 0.060008582 | 0.176325408 | 0.080088791 | 2.938336495 | 1.334622275 |
| <i>CPS1</i>      | 0.044370929 | 0.106671862 | 0.118436861 | 2.404093496 | 2.66924455  |
| <i>CD164L2</i>   | 0.055355545 | 0.399239719 | 0.177308985 | 7.212280488 | 3.20309346  |
| <i>LAMC3</i>     | 0.097793586 | 0.380646069 | 0.223744283 | 3.892341851 | 2.2879239   |
| <i>ATP2A3</i>    | 0.592944578 | 1.649101137 | 1.145140189 | 2.781206201 | 1.931276939 |
| <i>PNLIPRP3</i>  | 0.036895706 | 0.20696836  | 0.206815688 | 5.609551491 | 5.605413555 |
| <i>C20orf112</i> | 0.204875814 | 0.608432522 | 0.772042801 | 2.969762554 | 3.768345247 |
| <i>ATP2C2</i>    | 0.049073839 | 0.078652064 | 0.196485115 | 1.602728997 | 4.003866825 |
| <i>COL21A1</i>   | 0.019683961 | 0.063096111 | 0.031524784 | 3.205457995 | 1.60154673  |
| <i>BEST3</i>     | 0.120600487 | 0.03865798  | 0.057944195 | 0.320545799 | 0.480464019 |
| <i>FAM107B</i>   | 1.282082689 | 1.824548307 | 4.248238631 | 1.423112817 | 3.313544959 |
| <i>BEST1</i>     | 0.092025044 | 0.258109611 | 0.128959607 | 2.804775745 | 1.401353389 |
| <i>NUTM2A</i>    | 0.203543446 | 0.118627267 | 0.07408735  | 0.582810544 | 0.363987893 |
| <i>NUTM2G</i>    | 0.040625744 | 0.162780143 | 0.065064027 | 4.006822493 | 1.60154673  |
| <i>ACSSI</i>     | 0.231374753 | 0.037083103 | 0.055583622 | 0.1602729   | 0.24023201  |
| <i>PARP10</i>    | 0.605402105 | 1.319601892 | 1.105320928 | 2.179711436 | 1.825763272 |
| <i>ALOX12B</i>   | 0.102148902 | 0.163717007 | 0.29992644  | 1.602728997 | 2.936169005 |
| <i>DISC1</i>     | 0.011906664 | 0.076332626 | 0.066741778 | 6.410915989 | 5.605413555 |
| <i>PRELP</i>     | 0.043913497 | 0.175953588 | 0.058607931 | 4.006822493 | 1.334622275 |
| <i>SULT1A1</i>   | 0.422906596 | 0.112967444 | 0.3010243   | 0.2671215   | 0.711798547 |
| <i>WNT9A</i>     | 0.206110123 | 0.330338671 | 0.49514249  | 1.602728997 | 2.402320095 |
| <i>PPARA</i>     | 0.211941945 | 0.339685501 | 0.556673283 | 1.602728997 | 2.626536637 |
| <i>BODIL1</i>    | 0.301565254 | 0.674114499 | 0.660907474 | 2.235385181 | 2.191590262 |
| <i>NRG2</i>      | 0.172759816 | 0.017305448 | 0.051878047 | 0.100170562 | 0.300290012 |
| <i>CCDC78</i>    | 0.261593196 | 0.139754334 | 0.034912811 | 0.534242999 | 0.133462228 |
| <i>CCDC87</i>    | 0.087676347 | 0.187361899 | 0.163820729 | 2.136971996 | 1.868471185 |
| <i>ZBED6CL</i>   | 0.029652692 | 0.142575688 | 0.047490172 | 4.808186992 | 1.60154673  |
| <i>NRTN</i>      | 1.080335669 | 1.917001586 | 2.471725798 | 1.774449961 | 2.2879239   |
| <i>COX6B2</i>    | 0.256140061 | 0.04105231  | 0.041022028 | 0.1602729   | 0.160154673 |
| <i>RARRES1</i>   | 0.609386153 | 1.85569363  | 3.96890563  | 3.045185095 | 6.512956702 |
| <i>ALPL</i>      | 0.295350407 | 1.025627769 | 0.68324747  | 3.472579494 | 2.313345277 |
| <i>FAM154B</i>   | 0.027209257 | 0.130827196 | 0.130730691 | 4.808186992 | 4.80464019  |
| <i>MYOCD</i>     | 0.019791424 | 0.039650361 | 0.039621113 | 2.003411247 | 2.001933413 |
| <i>ACTA2</i>     | 26.21670742 | 58.2508464  | 54.48257301 | 2.221897871 | 2.0781623   |
| <i>ACTA1</i>     | 0.171183223 | 0.091453439 | 0.045692989 | 0.534242999 | 0.266924455 |
| <i>ASB16</i>     | 0.159312172 | 0.351084578 | 0.318932361 | 2.203752371 | 2.001933413 |
| <i>FAM156B</i>   | 0.191013866 | 0.393613022 | 0.458876449 | 2.060651568 | 2.402320095 |
| <i>EYA4</i>      | 0.927791221 | 2.122569573 | 1.677630157 | 2.287766391 | 1.808197921 |
| <i>NFATC2</i>    | 0.045284882 | 0.136086363 | 0.126920246 | 3.00511687  | 2.802706778 |
| <i>CSF1</i>      | 114.7297672 | 239.5254442 | 289.4903468 | 2.087735817 | 2.523236592 |
| <i>GOLGA8B</i>   | 0.117614612 | 0.397953627 | 0.324406902 | 3.383538994 | 2.758219368 |



|                  |             |             |             |             |             |
|------------------|-------------|-------------|-------------|-------------|-------------|
| <i>TSSK3</i>     | 0.711552032 | 1.814312619 | 2.0719706   | 2.549796132 | 2.911903146 |
| <i>TSSK4</i>     | 0.15194801  | 0.446474383 | 0.567820956 | 2.938336495 | 3.73694237  |
| <i>CCDC33</i>    | 0.463890817 | 0.721623874 | 1.17996801  | 1.555589909 | 2.543633042 |
| <i>CCDC18</i>    | 0.281317064 | 0.763982666 | 0.438027357 | 2.715735246 | 1.557059321 |
| <i>CCDC19</i>    | 0.142382481 | 0.380334217 | 0.266037562 | 2.671214996 | 1.868471185 |
| <i>ZGLP1</i>     | 0.086052711 | 0.344797939 | 0.413452315 | 4.006822493 | 4.80464019  |
| <i>MAGIX</i>     | 0.751619514 | 0.373854535 | 0.352824382 | 0.497398654 | 0.469418869 |
| <i>CCDC65</i>    | 0.046937843 | 0.188071603 | 0.187932871 | 4.006822493 | 4.003866825 |
| <i>SNAP91</i>    | 0.150916181 | 0.498872838 | 0.302124145 | 3.305628557 | 2.001933413 |
| <i>CLDN22</i>    | 0.062918895 | 0.22689436  | 0.176343214 | 3.606140244 | 2.802706778 |
| <i>LMO2</i>      | 0.222821755 | 0.059520481 | 0.118953151 | 0.2671215   | 0.53384891  |
| <i>AMPH</i>      | 0.137739991 | 0.082784954 | 0.027574629 | 0.601023374 | 0.200193341 |
| <i>RASL12</i>    | 0.090277836 | 0.337612112 | 0.433752517 | 3.739700994 | 4.80464019  |
| <i>CHRNA3</i>    | 0.051351528 | 0.205756456 | 0.164483742 | 4.006822493 | 3.20309346  |
| <i>FAM163A</i>   | 0.10763384  | 0.43126969  | 0.344761248 | 4.006822493 | 3.20309346  |
| <i>VATIL</i>     | 0.045242796 | 0.126895896 | 0.12680229  | 2.804775745 | 2.802706778 |
| <i>FAM167A</i>   | 0.45335961  | 0.252734815 | 0.189411287 | 0.557470956 | 0.417794799 |
| <i>CLDN4</i>     | 0.41874913  | 0.671141374 | 1.341292601 | 1.602728997 | 3.20309346  |
| <i>CLDN7</i>     | 0.212026342 | 0.067964153 | 0.135828038 | 0.320545799 | 0.640618692 |
| <i>UGT8</i>      | 0.040879167 | 0.114656896 | 0.114572319 | 2.804775745 | 2.802706778 |
| <i>COL24A1</i>   | 0.01310649  | 0.052515378 | 0.125943936 | 4.006822493 | 9.60928038  |
| <i>HAPI</i>      | 0.238208954 | 0.399138235 | 0.606936228 | 1.675580315 | 2.547915252 |
| <i>RBPMS</i>     | 0.022289949 | 0.142898989 | 0.142793578 | 6.410915989 | 6.40618692  |
| <i>PTPRD</i>     | 0.016853053 | 0.040516316 | 0.040486428 | 2.404093496 | 2.402320095 |
| <i>NTN3</i>      | 0.085792733 | 0.240629378 | 0.206101607 | 2.804775745 | 2.402320095 |
| <i>PPP5D1</i>    | 0.088788102 | 0.320182349 | 0.213297442 | 3.606140244 | 2.402320095 |
| <i>SPATA25</i>   | 0.494154201 | 1.583990533 | 0.870552149 | 3.205457995 | 1.761701403 |
| <i>ANK2</i>      | 0.125736485 | 0.293122198 | 0.329519221 | 2.331242178 | 2.620712831 |
| <i>ANK1</i>      | 4.223506636 | 8.164181091 | 9.512571467 | 1.933033802 | 2.252292298 |
| <i>ALPK3</i>     | 0.023410878 | 0.056281939 | 0.056240422 | 2.404093496 | 2.402320095 |
| <i>KIAA1211L</i> | 0.21298046  | 0.68269992  | 0.477537424 | 3.205457995 | 2.242165422 |
| <i>WNK2</i>      | 0.485926293 | 1.458194003 | 0.885861726 | 3.000854293 | 1.823037235 |
| <i>CTSS</i>      | 0.020743166 | 0.033245674 | 0.049831725 | 1.602728997 | 2.402320095 |
| <i>ANO4</i>      | 0.100819153 | 0.048475734 | 0.032293317 | 0.480818699 | 0.320309346 |
| <i>ANO2</i>      | 0.114505624 | 0.073408594 | 0.036677222 | 0.641091599 | 0.320309346 |
| <i>SCARA5</i>    | 0.020523292 | 0.148019737 | 0.723118239 | 7.212280488 | 35.23402806 |
| <i>FAM132A</i>   | 0.081679946 | 0.458187866 | 0.196221377 | 5.609551491 | 2.402320095 |
| <i>SBK1</i>      | 0.921365501 | 2.187702527 | 2.090447366 | 2.374413329 | 2.268857868 |
| <i>ROPNIL</i>    | 0.187098501 | 0.549758354 | 0.299646993 | 2.938336495 | 1.60154673  |
| <i>ANXA8</i>     | 0.039132836 | 0.094078997 | 0.062673066 | 2.404093496 | 1.60154673  |
| <i>ANXA3</i>     | 0.157958314 | 0.042194062 | 0.042162937 | 0.2671215   | 0.266924455 |
| <i>PRSS16</i>    | 0.178412951 | 0.09531587  | 0.07143417  | 0.534242999 | 0.400386683 |
| <i>AOC3</i>      | 0.021129014 | 0.067728167 | 0.033839103 | 3.205457995 | 1.60154673  |
| <i>PRSS35</i>    | 0.06533143  | 0.445011451 | 0.366209681 | 6.811598239 | 5.605413555 |
| <i>C11orf16</i>  | 0.04425568  | 0.106394793 | 0.07087754  | 2.404093496 | 1.60154673  |
| <i>TMCC3</i>     | 0.435914297 | 0.79180615  | 1.361367379 | 1.816426197 | 3.123016124 |
| <i>BTN3A1</i>    | 1.05702543  | 2.00362897  | 2.278871029 | 1.895535256 | 2.15592829  |
| <i>LRR1Q3</i>    | 0.237883935 | 0.09531587  | 0.119056949 | 0.400682249 | 0.500483353 |
| <i>SCG2</i>      | 1.75551546  | 1.884591536 | 5.596556126 | 1.073526027 | 3.187984529 |

|                 |             |             |             |             |             |
|-----------------|-------------|-------------|-------------|-------------|-------------|
| <i>USP53</i>    | 0.310024628 | 0.71427285  | 0.786154971 | 2.303922934 | 2.535782323 |
| <i>AOX1</i>     | 6.164087912 | 2.628961994 | 3.428955967 | 0.426496512 | 0.556279536 |
| <i>CAMK1D</i>   | 0.985486748 | 1.545862481 | 2.54375443  | 1.56862838  | 2.581216272 |
| <i>RAPGEF3</i>  | 0.05479478  | 0.087821183 | 0.219391002 | 1.602728997 | 4.003866825 |
| <i>SRCIN1</i>   | 0.398771926 | 0.69722545  | 1.103125964 | 1.748431633 | 2.766307988 |
| <i>PRKAA2</i>   | 0.12753321  | 0.248201425 | 0.320964907 | 1.946170925 | 2.51671629  |
| <i>APLN</i>     | 9.697745534 | 4.129233386 | 3.491389356 | 0.425793126 | 0.360020723 |
| <i>APLF</i>     | 0.132801534 | 0.195107797 | 0.354479771 | 1.469168248 | 2.66924455  |
| <i>CERKL</i>    | 0.543779899 | 1.597808323 | 2.135751397 | 2.938336495 | 3.927602695 |
| <i>SDC2</i>     | 1.760068081 | 4.760289254 | 4.169521268 | 2.704605183 | 2.368954538 |
| <i>SDC3</i>     | 6.404801975 | 12.65147869 | 13.46808201 | 1.975311453 | 2.102810057 |
| <i>APOE</i>     | 38.56719737 | 64.29631419 | 94.47067877 | 1.667124359 | 2.449508526 |
| <i>APOB</i>     | 0.042231095 | 0.024173214 | 0.01449323  | 0.572403213 | 0.343188585 |
| <i>DYNC111</i>  | 0.111874175 | 0.067238994 | 0.022396465 | 0.601023374 | 0.200193341 |
| <i>FGF14</i>    | 0.030092612 | 0.120575754 | 0.048194724 | 4.006822493 | 1.60154673  |
| <i>CYP26B1</i>  | 0.037397798 | 0.209784874 | 0.239577285 | 5.609551491 | 6.40618692  |
| <i>PRKCH</i>    | 0.121494843 | 0.194723309 | 0.486449173 | 1.602728997 | 4.003866825 |
| <i>SDPR</i>     | 0.026204917 | 0.14699783  | 0.188857794 | 5.609551491 | 7.206960285 |
| <i>PRKD1</i>    | 0.254719768 | 0.463916771 | 0.723176311 | 1.821282952 | 2.839105567 |
| <i>FREM2</i>    | 0.015812445 | 0.038014597 | 0.139284035 | 2.404093496 | 8.808507015 |
| <i>ASGR1</i>    | 0.169931218 | 0.453922819 | 0.408229181 | 2.671214996 | 2.402320095 |
| <i>ASHIL</i>    | 1.418181425 | 2.980361464 | 2.815928415 | 2.101537512 | 1.985591099 |
| <i>MAP2K6</i>   | 0.128494999 | 0.377561544 | 0.342984575 | 2.938336495 | 2.66924455  |
| <i>AQP3</i>     | 0.182131874 | 0.547327568 | 0.510462238 | 3.00511687  | 2.802706778 |
| <i>DYNC2HI</i>  | 0.236316738 | 0.563143959 | 0.478070273 | 2.383004957 | 2.023006396 |
| <i>SVEP1</i>    | 0.227749682 | 0.536470287 | 0.375804843 | 2.355525951 | 1.650078449 |
| <i>C15orf27</i> | 0.03551154  | 0.085373062 | 0.085310086 | 2.404093496 | 2.402320095 |
| <i>C22orf24</i> | 0.06831771  | 0.218989549 | 0.164121007 | 3.205457995 | 2.402320095 |
| <i>RNASE4</i>   | 1.167016222 | 1.834441302 | 2.839489425 | 1.571907286 | 2.433119071 |
| <i>UBE2Q2L</i>  | 1.881755073 | 1.096706698 | 0.684936064 | 0.582810544 | 0.363987893 |
| <i>GPRC5B</i>   | 0.182480199 | 0.376028108 | 0.626251212 | 2.060651568 | 3.43188585  |
| <i>PFKFB1</i>   | 0.097029823 | 0.038878128 | 0.038849449 | 0.400682249 | 0.400386683 |
| <i>CNTNAP3</i>  | 4.486344973 | 11.69650537 | 13.79886098 | 2.607134636 | 3.075746752 |
| <i>TAS2R20</i>  | 0.445100231 | 0.285350019 | 0.106927323 | 0.641091599 | 0.24023201  |
| <i>ARR3</i>     | 0.063011971 | 0.201982225 | 0.100916615 | 3.205457995 | 1.60154673  |
| <i>EPHB3</i>    | 0.040375443 | 0.097066339 | 0.096994737 | 2.404093496 | 2.402320095 |
| <i>EPHA5</i>    | 0.060699811 | 0.259427591 | 0.105314715 | 4.273943993 | 1.735008958 |
| <i>TAS2R14</i>  | 0.089299983 | 0.357809182 | 0.214527145 | 4.006822493 | 2.402320095 |
| <i>PIK3R1</i>   | 2.308433378 | 4.580696236 | 5.829233072 | 1.98433114  | 2.525190082 |
| <i>LKAAEAR1</i> | 0.294443033 | 0.078652064 | 0.078594046 | 0.2671215   | 0.266924455 |
| <i>KLHL38</i>   | 0.155035822 | 0.34166056  | 0.310371392 | 2.203752371 | 2.001933413 |
| <i>CCND2</i>    | 0.052249116 | 0.157014701 | 0.073219476 | 3.00511687  | 1.401353389 |
| <i>C9orf163</i> | 0.09933018  | 0.185732586 | 0.212109233 | 1.869850497 | 2.13539564  |
| <i>C9orf169</i> | 0.32842014  | 0.684279025 | 0.631176241 | 2.083547697 | 1.921856076 |
| <i>MAML2</i>    | 0.802682652 | 1.516897586 | 1.909113595 | 1.889784937 | 2.378416413 |
| <i>MAML3</i>    | 0.011997209 | 0.048070689 | 0.038428183 | 4.006822493 | 3.20309346  |
| <i>SLC2A12</i>  | 0.060862428 | 0.451150152 | 0.450817357 | 7.412621613 | 7.407153627 |
| <i>ANKRD65</i>  | 0.038340317 | 0.092173707 | 0.061403809 | 2.404093496 | 1.60154673  |
| <i>CD177</i>    | 0.180186515 | 0.548701289 | 0.259719411 | 3.045185095 | 1.441392057 |

|                      |             |             |             |             |             |
|----------------------|-------------|-------------|-------------|-------------|-------------|
| <i>CD180</i>         | 0.048349707 | 0.096864347 | 0.212944368 | 2.003411247 | 4.404253508 |
| <i>ANKRD12</i>       | 0.097654386 | 0.210691272 | 0.216551164 | 2.157519804 | 2.217526242 |
| <i>EIF4E3</i>        | 0.013720758 | 0.032985984 | 0.12085939  | 2.404093496 | 8.808507015 |
| <i>GRASP</i>         | 0.027375381 | 0.153563607 | 0.087685902 | 5.609551491 | 3.20309346  |
| <i>SGCG</i>          | 0.048764845 | 0.117235247 | 0.078099178 | 2.404093496 | 1.60154673  |
| <i>NLGN3</i>         | 0.171025715 | 0.479688777 | 0.855955232 | 2.804775745 | 5.004833531 |
| <i>NLGN1</i>         | 0.068758825 | 0.22827508  | 0.220240943 | 3.319938637 | 3.20309346  |
| <i>FAAH</i>          | 0.569303379 | 0.228109758 | 0.293067632 | 0.400682249 | 0.514782878 |
| <i>STAG3</i>         | 0.01945027  | 0.062347025 | 0.093451551 | 3.205457995 | 4.80464019  |
| <i>MAP4K1</i>        | 0.03029594  | 0.097112364 | 0.097040728 | 3.205457995 | 3.20309346  |
| <i>STAC3</i>         | 0.154333667 | 0.371032565 | 0.37075887  | 2.404093496 | 2.402320095 |
| <i>STAC2</i>         | 0.025997005 | 0.041666153 | 0.145723962 | 1.602728997 | 5.605413555 |
| <i>SOHLH2</i>        | 0.155389301 | 0.062261735 | 0.031107903 | 0.400682249 | 0.200193341 |
| <i>LATS1</i>         | 0.679996149 | 1.61661016  | 1.343156251 | 2.377381346 | 1.975240967 |
| <i>ARID3C</i>        | 0.068758825 | 0.330605288 | 0.440481885 | 4.808186992 | 6.40618692  |
| <i>FAT2</i>          | 0.017369618 | 0.060317378 | 0.03245463  | 3.472579494 | 1.868471185 |
| <i>MPV17L</i>        | 0.294910201 | 0.679450375 | 0.531351526 | 2.303922934 | 1.801740071 |
| <i>MFSD2B</i>        | 0.045146891 | 0.144716464 | 0.108457285 | 3.205457995 | 2.402320095 |
| <i>PCDHB14</i>       | 0.086256008 | 0.32257168  | 0.207214542 | 3.739700994 | 2.402320095 |
| <i>ZFAND4</i>        | 0.28984517  | 0.125069339 | 0.160684818 | 0.431503961 | 0.55438156  |
| <i>MAN1C1</i>        | 0.091782142 | 0.279493611 | 0.27928744  | 3.045185095 | 3.042938787 |
| <i>SMOC1</i>         | 0.728917084 | 2.007940941 | 2.809043671 | 2.754690464 | 3.853721819 |
| <i>PPIL6</i>         | 0.020054657 | 0.112497633 | 0.192710825 | 5.609551491 | 9.60928038  |
| <i>FCN2</i>          | 0.078445842 | 0.565773414 | 0.125634681 | 7.212280488 | 1.60154673  |
| <i>PCDHA11</i>       | 0.012440447 | 0.029907999 | 0.039847916 | 2.404093496 | 3.20309346  |
| <i>PRRT4</i>         | 0.022657496 | 0.145255302 | 0.054430557 | 6.410915989 | 2.402320095 |
| <i>JPH3</i>          | 0.021282084 | 0.068218828 | 0.136337011 | 3.205457995 | 6.40618692  |
| <i>STON1-GTF2AIL</i> | 0.06673017  | 0.124775442 | 0.142495315 | 1.869850497 | 2.13539564  |
| <i>FRMD5</i>         | 0.536792858 | 0.784421702 | 1.403331941 | 1.461311733 | 2.614289515 |
| <i>SI00A8</i>        | 0.162891366 | 1.04428286  | 0.652195335 | 6.410915989 | 4.003866825 |
| <i>PPMIN</i>         | 0.521584801 | 0.905622343 | 1.287819584 | 1.736289747 | 2.469051209 |
| <i>PPMIJ</i>         | 0.894667045 | 1.553401218 | 2.427886554 | 1.736289747 | 2.713731959 |
| <i>PPMIK</i>         | 0.051709975 | 0.13467525  | 0.207039854 | 2.604434621 | 4.003866825 |
| <i>PPMIE</i>         | 0.104131012 | 0.312925861 | 0.354387699 | 3.00511687  | 3.403286801 |
| <i>TPD52L1</i>       | 1.837358394 | 4.417181365 | 5.836187067 | 2.404093496 | 3.176401015 |
| <i>MCOLN2</i>        | 0.671686078 | 0.336415861 | 0.20170062  | 0.500852812 | 0.300290012 |
| <i>RASSF5</i>        | 2.847584057 | 0.980673918 | 1.413390166 | 0.344388049 | 0.496347127 |
| <i>DCLK1</i>         | 0.100664285 | 0.475945826 | 0.773849069 | 4.728050542 | 7.687424304 |
| <i>C5orf42</i>       | 0.223987338 | 0.38142794  | 0.515668897 | 1.70289956  | 2.302223424 |
| <i>C5orf54</i>       | 0.667697917 | 0.267534703 | 0.315944145 | 0.400682249 | 0.473184261 |
| <i>CRYBB3</i>        | 0.78973056  | 0.316431017 | 0.1580988   | 0.400682249 | 0.200193341 |
| <i>CPXMI</i>         | 0.638941381 | 1.877424779 | 2.47296166  | 2.938336495 | 3.870404598 |
| <i>CNTFR</i>         | 0.581233226 | 1.530418924 | 1.163590215 | 2.633054781 | 2.001933413 |
| <i>SOX15</i>         | 20.47301414 | 7.982789593 | 7.927962974 | 0.389917652 | 0.387239657 |
| <i>HOXA7</i>         | 0.042216147 | 0.067661043 | 0.270444527 | 1.602728997 | 6.40618692  |
| <i>HOXA4</i>         | 0.246505163 | 0.118524292 | 0.078957907 | 0.480818699 | 0.320309346 |
| <i>HOXB9</i>         | 1.577048948 | 2.729788646 | 7.627667111 | 1.730947317 | 4.836671125 |
| <i>ELANE</i>         | 0.066608432 | 0.320265795 | 0.106676516 | 4.808186992 | 1.60154673  |
| <i>CNTD1</i>         | 0.103988019 | 0.06249923  | 0.020817709 | 0.601023374 | 0.200193341 |

|                     |             |             |             |             |             |
|---------------------|-------------|-------------|-------------|-------------|-------------|
| <i>CLSTN3</i>       | 3.305239259 | 5.733119918 | 7.699629277 | 1.734555192 | 2.329522516 |
| <i>SERINC2</i>      | 0.060635007 | 0.145772225 | 0.169942144 | 2.404093496 | 2.802706778 |
| <i>CCT6B</i>        | 0.179540957 | 0.647449871 | 0.467257754 | 3.606140244 | 2.602513436 |
| <i>LOC101929097</i> | 0.194354793 | 0.726828812 | 1.141317037 | 3.739700994 | 5.87233801  |
| <i>STEAP1</i>       | 0.908370585 | 0.155986273 | 0.623484832 | 0.171720964 | 0.68637717  |
| <i>DPYSL3</i>       | 0.031092038 | 0.087206194 | 0.074693028 | 2.804775745 | 2.402320095 |
| <i>CACNA2D3</i>     | 0.068262968 | 0.237048583 | 0.127547389 | 3.472579494 | 1.868471185 |
| <i>FEZ1</i>         | 0.045900961 | 0.073566802 | 0.147025069 | 1.602728997 | 3.20309346  |
| <i>TXNIP</i>        | 6.453516828 | 2.239495848 | 2.606972749 | 0.347019448 | 0.403961564 |
| <i>BTBD19</i>       | 0.242614031 | 0.583266815 | 0.444065953 | 2.404093496 | 1.83033912  |
| <i>BTBD11</i>       | 0.443709293 | 0.99560405  | 2.510861456 | 2.243820596 | 5.658798446 |
| <i>LOC101929668</i> | 0.162332668 | 0.182122692 | 0.493968372 | 1.121910298 | 3.042938787 |
| <i>PLSCR4</i>       | 0.744470005 | 1.511365974 | 1.748711802 | 2.030123397 | 2.348935204 |
| <i>CASP8AP2</i>     | 0.352710507 | 0.686434933 | 0.756538873 | 1.946170925 | 2.144928656 |
| <i>ALDH1L1</i>      | 0.284923693 | 0.020757067 | 0.04148351  | 0.072851318 | 0.145595157 |
| <i>TNFRSF14</i>     | 0.084712149 | 0.362054979 | 0.520070115 | 4.273943993 | 6.139262465 |
| <i>TNFRSF1B</i>     | 0.20863392  | 0.297229897 | 0.705400277 | 1.424647998 | 3.381043097 |
| <i>NBEAL1</i>       | 0.092691793 | 0.303872368 | 0.249666309 | 3.278309313 | 2.69351041  |
| <i>GRIK4</i>        | 0.014800588 | 0.047442663 | 0.047407666 | 3.205457995 | 3.20309346  |
| <i>GRIP2</i>        | 0.074758091 | 0.171167085 | 0.136832658 | 2.289612853 | 1.83033912  |
| <i>CNTN3</i>        | 0.253246683 | 0.446474383 | 0.635418689 | 1.763001897 | 2.509089877 |
| <i>CNTN4</i>        | 0.049092692 | 0.07868228  | 0.11793636  | 1.602728997 | 2.402320095 |
| <i>TTC36</i>        | 0.752802806 | 0.402179629 | 0.200941479 | 0.534242999 | 0.266924455 |
| <i>LOC100507462</i> | 0.062826095 | 0.125866504 | 0.251547316 | 2.003411247 | 4.003866825 |
| <i>TTC16</i>        | 0.059079185 | 0.236719806 | 0.236545187 | 4.006822493 | 4.003866825 |
| <i>OPN1SW</i>       | 0.775885102 | 1.865300327 | 1.55327031  | 2.404093496 | 2.001933413 |
| <i>LOC101929747</i> | 0.12727916  | 0.509985    | 0.305765283 | 4.006822493 | 2.402320095 |
| <i>SLC4A4</i>       | 0.594594539 | 0.114709822 | 0.246885058 | 0.192921083 | 0.415215819 |
| <i>AC022007.5</i>   | 0.718542408 | 1.115640354 | 1.87001627  | 1.552643716 | 2.602513436 |
| <i>PLAC9</i>        | 31.26667087 | 15.01331176 | 12.16397599 | 0.480169821 | 0.389039692 |
| <i>LOC101929792</i> | 0.147774821 | 0.059210748 | 0.05916707  | 0.400682249 | 0.400386683 |
| <i>MYZAP</i>        | 0.319737138 | 0.085408664 | 0.199139877 | 0.2671215   | 0.622823728 |
| <i>ADCY1</i>        | 0.06134328  | 0.016386109 | 0.010916014 | 0.2671215   | 0.177949637 |
| <i>ADCY7</i>        | 0.080827499 | 0.226703009 | 0.183386108 | 2.804775745 | 2.268857868 |
| <i>FGD6</i>         | 0.082550566 | 0.183758592 | 0.242382413 | 2.226012496 | 2.936169005 |
| <i>RSPH4A</i>       | 0.029704388 | 0.166628293 | 0.09514593  | 5.609551491 | 3.20309346  |
| <i>NOXRED1</i>      | 0.096226112 | 0.051408126 | 0.025685102 | 0.534242999 | 0.266924455 |
| <i>KIAA1407</i>     | 0.1902083   | 0.406469811 | 0.558483715 | 2.136971996 | 2.936169005 |
| <i>SLC51A</i>       | 0.058551329 | 0.093841913 | 0.37509076  | 1.602728997 | 6.40618692  |
| <i>TIAM2</i>        | 0.014400302 | 0.115398905 | 0.126845158 | 8.013644987 | 8.808507015 |
| <i>HMX2</i>         | 0.156988054 | 0.167739538 | 0.50284741  | 1.068485998 | 3.20309346  |
| <i>GRHL3</i>        | 0.089082103 | 0.166570214 | 0.190225534 | 1.869850497 | 2.13539564  |
| <i>GRHL1</i>        | 0.115876203 | 0.130002705 | 0.371162307 | 1.121910298 | 3.20309346  |
| <i>MAGED4B</i>      | 0.223266675 | 0.281156837 | 0.612980595 | 1.259287069 | 2.74550868  |
| <i>OAS1</i>         | 0.804690036 | 0.252332619 | 0.308179036 | 0.313577413 | 0.382978566 |
| <i>SNCB</i>         | 0.05875323  | 0.282496519 | 0.188192088 | 4.808186992 | 3.20309346  |
| <i>SNCA</i>         | 0.370976852 | 0.976802374 | 1.124616018 | 2.633054781 | 3.031499168 |
| <i>FGFBP1</i>       | 0.062687406 | 0.200941845 | 0.250992024 | 3.205457995 | 4.003866825 |
| <i>RIPK4</i>        | 3.080295916 | 6.453206887 | 11.76929602 | 2.094995761 | 3.820832913 |

|                     |             |             |             |             |             |
|---------------------|-------------|-------------|-------------|-------------|-------------|
| <i>FNDC1</i>        | 1.66457023  | 3.772513677 | 3.717662743 | 2.266358973 | 2.233406963 |
| <i>CHRD12</i>       | 0.341965616 | 0.71935265  | 1.06111821  | 2.103581809 | 3.10299679  |
| <i>CCDC116</i>      | 0.186334611 | 0.089593165 | 0.059684717 | 0.480818699 | 0.320309346 |
| <i>CAPS2</i>        | 0.036037303 | 0.043318523 | 0.115430849 | 1.202046748 | 3.20309346  |
| <i>CCDC169</i>      | 0.852632369 | 0.170817328 | 0.398279753 | 0.200341125 | 0.467117796 |
| <i>CCDC153</i>      | 0.219379015 | 0.937613624 | 1.229710105 | 4.273943993 | 5.605413555 |
| <i>CCDC150</i>      | 0.092474555 | 0.277896847 | 0.203640693 | 3.00511687  | 2.202126754 |
| <i>CCDC147</i>      | 0.231430624 | 0.061820095 | 0.144140484 | 0.2671215   | 0.622823728 |
| <i>CCDC175</i>      | 0.065281367 | 0.026157085 | 0.02613779  | 0.400682249 | 0.400386683 |
| <i>PLCE1</i>        | 1.339009462 | 2.278361235 | 3.47377392  | 1.70152736  | 2.594286313 |
| <i>NHLRC4</i>       | 0.041679151 | 0.133600767 | 0.133502215 | 3.205457995 | 3.20309346  |
| <i>RIPPLY2</i>      | 0.384904447 | 1.439427542 | 1.130144506 | 3.739700994 | 2.936169005 |
| <i>LOC101929571</i> | 0.87927713  | 1.80069933  | 1.721137505 | 2.047931497 | 1.957446003 |
| <i>ENKUR</i>        | 0.025189883 | 0.040372556 | 0.060514162 | 1.602728997 | 2.402320095 |
| <i>CSF1R</i>        | 0.042713554 | 0.102687378 | 0.171019383 | 2.404093496 | 4.003866825 |
| <i>KIAA1644</i>     | 0.416618565 | 1.51756058  | 1.13227605  | 3.642565903 | 2.717776269 |
| <i>1-Mar</i>        | 0.015483858 | 0.037224641 | 0.061995304 | 2.404093496 | 4.003866825 |
| <i>DDX60L</i>       | 0.172553614 | 0.483974191 | 0.473747445 | 2.804775745 | 2.74550868  |
| <i>SOX7</i>         | 2.754841832 | 0.999682616 | 1.602474578 | 0.362882037 | 0.58169386  |
| <i>SOX4</i>         | 2.147702123 | 4.78547597  | 4.642122941 | 2.228184216 | 2.16143705  |
| <i>CREBRF</i>       | 0.085394997 | 0.205297558 | 0.264980403 | 2.404093496 | 3.10299679  |
| <i>ERO1LB</i>       | 0.084281939 | 0.202621662 | 0.269962928 | 2.404093496 | 3.20309346  |
| <i>MAGEB17</i>      | 0.875048114 | 2.253961584 | 2.102145667 | 2.57581446  | 2.402320095 |
| <i>KIAA1109</i>     | 0.27141438  | 0.712211935 | 0.677593796 | 2.624075907 | 2.496528726 |
| <i>SPATA1</i>       | 0.199140216 | 0.095750339 | 0.031893236 | 0.480818699 | 0.160154673 |
| <i>ITGAM</i>        | 0.017954096 | 0.02877555  | 0.115017293 | 1.602728997 | 6.40618692  |
| <i>ITGB4</i>        | 14.64747301 | 28.79698983 | 34.77022449 | 1.966003953 | 2.373803623 |
| <i>ITGB8</i>        | 0.165007079 | 0.707823775 | 0.792799643 | 4.289657022 | 4.80464019  |
| <i>ITGA4</i>        | 1.876973476 | 4.063422739 | 5.462505885 | 2.164880213 | 2.910273349 |
| <i>ITGA2</i>        | 2.55253447  | 3.883880707 | 7.494672594 | 1.521578162 | 2.936169005 |
| <i>ITGA7</i>        | 0.832620192 | 1.698409396 | 2.727573026 | 2.039836906 | 3.275891039 |
| <i>LRRC16B</i>      | 0.03704008  | 0.05936521  | 0.133473193 | 1.602728997 | 3.603480143 |
| <i>DDR1</i>         | 6.626058771 | 12.38973929 | 14.23347878 | 1.869850497 | 2.148106328 |
| <i>RP11-35G9.3</i>  | 0.128948816 | 0.34445001  | 0.58513307  | 2.671214996 | 4.537715735 |
| <i>MAGEA12</i>      | 0.457530527 | 1.026616421 | 2.01508043  | 2.243820596 | 4.404253508 |
| <i>LOC101927402</i> | 0.070406764 | 0.02821074  | 0.028189931 | 0.400682249 | 0.400386683 |
| <i>LOC101927562</i> | 0.321884827 | 0.472902967 | 1.28878398  | 1.469168248 | 4.003866825 |
| <i>CIQTNF6</i>      | 0.124732334 | 0.359841832 | 0.199764662 | 2.884912195 | 1.60154673  |
| <i>KIAA1024</i>     | 0.037908121 | 0.091134667 | 0.091067441 | 2.404093496 | 2.402320095 |
| <i>GRAMD1C</i>      | 0.1585603   | 0.290433361 | 0.435328681 | 1.831690283 | 2.74550868  |
| <i>CXorf22</i>      | 0.188634784 | 0.037791305 | 0.094408569 | 0.200341125 | 0.500483353 |
| <i>NLRC4</i>        | 0.02524961  | 0.101170705 | 0.060657646 | 4.006822493 | 2.402320095 |
| <i>SLC22A31</i>     | 0.120271319 | 0.032127055 | 0.032103356 | 0.2671215   | 0.266924455 |
| <i>LRRC37A</i>      | 0.013954494 | 0.055913179 | 0.044697548 | 4.006822493 | 3.20309346  |
| <i>IQGAP2</i>       | 0.043778101 | 0.175411079 | 0.233708914 | 4.006822493 | 5.3384891   |
| <i>ABCA1</i>        | 0.67323158  | 1.209008713 | 2.104461656 | 1.795828877 | 3.125910485 |
| <i>ZBTB8B</i>       | 0.211973586 | 0.492617509 | 0.458305565 | 2.323957046 | 2.162088086 |
| <i>SRPX</i>         | 3.044176839 | 5.488864305 | 7.958359594 | 1.803070122 | 2.614289515 |
| <i>FABP3</i>        | 0.232977714 | 1.369133841 | 0.559687045 | 5.87667299  | 2.402320095 |

|                     |             |             |             |             |             |
|---------------------|-------------|-------------|-------------|-------------|-------------|
| <i>ZBTB20</i>       | 0.009223926 | 0.014783454 | 0.036931373 | 1.602728997 | 4.003866825 |
| <i>ITIH4</i>        | 0.051898985 | 0.124770013 | 0.249355595 | 2.404093496 | 4.80464019  |
| <i>ZBTB41</i>       | 0.100533614 | 0.265861427 | 0.193211136 | 2.644502846 | 1.921856076 |
| <i>IL12A</i>        | 0.236152971 | 0.283866911 | 0.803696288 | 1.202046748 | 3.403286801 |
| <i>ST8SIA4</i>      | 0.282985743 | 0.129585559 | 0.151071631 | 0.457922571 | 0.53384891  |
| <i>ST8SIA6</i>      | 0.060142735 | 0.096392505 | 0.144482101 | 1.602728997 | 2.402320095 |
| <i>ST8SIA1</i>      | 0.008770042 | 0.091364    | 0.105342236 | 10.41773848 | 12.01160048 |
| <i>DAPK2</i>        | 0.030777523 | 0.086324051 | 0.110906194 | 2.804775745 | 3.603480143 |
| <i>ACE</i>          | 0.154302608 | 0.384697077 | 0.906117068 | 2.493133996 | 5.87233801  |
| <i>SSPN</i>         | 0.018793775 | 0.090363987 | 0.150495548 | 4.808186992 | 8.00773365  |
| <i>GARNL3</i>       | 0.227908465 | 0.566177034 | 0.693511508 | 2.484229946 | 3.042938787 |
| <i>LOC101927371</i> | 0.05457539  | 0.437347803 | 0.655537784 | 8.013644987 | 12.01160048 |
| <i>MOB3B</i>        | 0.026112547 | 0.125554008 | 0.20910232  | 4.808186992 | 8.00773365  |
| <i>NOTCH4</i>       | 0.02523839  | 0.050562874 | 0.080840921 | 2.003411247 | 3.20309346  |
| <i>AK7</i>          | 0.051631627 | 0.206878764 | 0.124035695 | 4.006822493 | 2.402320095 |
| <i>UGT3A2</i>       | 0.035719993 | 0.114498938 | 0.171621716 | 3.205457995 | 4.80464019  |
| <i>RCAN2</i>        | 0.124622856 | 0.33955233  | 0.518932251 | 2.724639295 | 4.164021498 |
| <i>C16orf45</i>     | 9.694809492 | 16.57810737 | 26.43816384 | 1.709998261 | 2.727043153 |
| <i>BAI2</i>         | 4.200611852 | 10.26256204 | 11.98095476 | 2.443111243 | 2.852192772 |
| <i>AMN</i>          | 0.16414679  | 0.043847137 | 0.043814793 | 0.2671215   | 0.266924455 |
| <i>TRAF5</i>        | 0.252969026 | 0.483410176 | 0.5921302   | 1.910946112 | 2.340722144 |
| <i>NFAT5</i>        | 0.700884409 | 1.857032838 | 1.658467188 | 2.649556496 | 2.366249223 |
| <i>LOC102723974</i> | 0.12205184  | 0.489040057 | 0.586415175 | 4.006822493 | 4.80464019  |
| <i>MAP7</i>         | 0.055463662 | 0.118524292 | 0.222069115 | 2.136971996 | 4.003866825 |
| <i>SLC2A1</i>       | 63.51112152 | 32.36778911 | 24.48099601 | 0.509639703 | 0.385459986 |
| <i>SLC2A4</i>       | 0.081161179 | 0.151759271 | 0.368286359 | 1.869850497 | 4.537715735 |
| <i>SLC2A5</i>       | 0.069886944 | 0.476041782 | 0.251836213 | 6.811598239 | 3.603480143 |
| <i>ABCC6</i>        | 0.066595415 | 0.200127004 | 0.479950509 | 3.00511687  | 7.206960285 |

---

**Table S5: Correlation analysis of the gene expression between c-Myc targets and LacRNA, TCGA database, n=1094**

| Gene Name | Pearson correlation coefficient | -LOG10(FDR) | <i>P</i> value (two-tailed) |
|-----------|---------------------------------|-------------|-----------------------------|
| CDC20     | -0.2353                         | 12.99999218 | 1.00002E-13                 |
| CDC45     | -0.2837                         | 13          | 1E-13                       |
| VBP1      | -0.2538                         | 12.99999409 | 1.00001E-13                 |
| IFRD1     | 0.07467                         | 1.869666232 | 0.0135                      |
| CCT2      | -0.2463                         | 12.99999661 | 1.00001E-13                 |
| CCT5      | -0.223                          | 11.99995093 | 1.00011E-12                 |
| NPM1      | -0.1433                         | 4.217443535 | 6.06117E-05                 |
| DUT       | -0.2134                         | 11.14532967 | 7.156E-12                   |
| NOP16     | -0.1696                         | 8.097040321 | 7.9976E-09                  |
| RAN       | -0.2833                         | 13          | 1E-13                       |
| MRPL9     | -0.1346                         | 6.807014621 | 1.5595E-07                  |
| CCNA2     | -0.243                          | 13          | 1E-13                       |
| PSMA4     | -0.1686                         | 8.847011843 | 1.42229E-09                 |
| EEF1B2    | 0.096415                        | 2.804931004 | 0.001567                    |
| AP3S1     | 0.086                           | 2.332080315 | 0.004655                    |
| SNRPB2    | -0.138956                       | 5.301029996 | 0.000005                    |
| LSM7      | -0.106716                       | 3.335358024 | 0.000462                    |
| PCNA      | -0.343797                       | 13          | 1E-13                       |
| CCT4      | -0.164508                       | 6.224025669 | 0.000000597                 |
| PPIA      | -0.179203                       | 7.468859709 | 3.39735E-08                 |
| PSMA7     | -0.253531                       | 12.9998541  | 1.00034E-13                 |
| AIMP2     | -0.242792                       | 12.99682457 | 1.00734E-13                 |
| EIF4A1    | -0.171278                       | 7.783886903 | 1.6448E-08                  |
| SRM       | -0.061536                       | 1.357782871 | 0.043875                    |
| TRA2B     | -0.118951                       | 4.026872146 | 0.000094                    |
| NME1      | -0.21612                        | 12.0308055  | 9.31525E-13                 |
| ODC1      | -0.010256                       | 0.132416441 | 0.737197                    |
| RFC4      | -0.25069                        | 12.99966546 | 1.00077E-13                 |
| PWP1      | -0.099451                       | 2.956244873 | 0.001106                    |
| RPS5      | 0.012517                        | 0.166133487 | 0.682129                    |
| PSMA2     | -0.179313                       | 8.477881936 | 3.3275E-09                  |
| RRP9      | -0.182122                       | 7.729093015 | 1.86598E-08                 |
| POLD2     | -0.282565                       | 15          | 1E-13                       |
| MAD2L1    | -0.329241                       | 15          | 1E-13                       |
| CDKN1A    | 0.081253                        | 2.110810388 | 0.007748                    |

**Table S6: Univariate and multivariate Cox regression analysis of OS and DFS in patients with breast cancer**

| Covariates                                                                  | Univariate analysis |              | Multivariate analysis |              |
|-----------------------------------------------------------------------------|---------------------|--------------|-----------------------|--------------|
|                                                                             | HR (95% CI)         | P-value      | HR (95% CI)           | P-value      |
| <b>DFS</b>                                                                  |                     |              |                       |              |
| <b>Age</b>                                                                  | 1.213               | 0.335        | —                     |              |
| ≤50 versus >50 years                                                        | (0.819-1.798)       |              |                       |              |
| <b>T stage</b>                                                              | 1.952               | <b>0.006</b> | 1,620                 | 0.094        |
| T2/3 versus T1                                                              | (1.211-3.144)       |              | (0,921-2.847)         |              |
| <b>pN stage</b>                                                             |                     | <b>0.000</b> |                       | <b>0.000</b> |
| N1 versus N0                                                                | 2.307               | <b>0.002</b> | 1.652                 | 0.103        |
|                                                                             | (1.353-3.935)       |              | (0.903-3.023)         |              |
| N2 versus N0                                                                | 3.535               | <b>0.000</b> | 3.991                 | <b>0.000</b> |
|                                                                             | (1.846-6.772)       |              | (2.025-7.869)         |              |
| N3 versus N0                                                                | 5.934               | <b>0.000</b> | 4.16                  | <b>0.000</b> |
|                                                                             | (3.491-10.086)      |              | (2.246-7.707)         |              |
| <b>ER</b>                                                                   | 0.752               | 0.197        | —                     |              |
| positive versus negative                                                    | (0.488-1.159)       |              |                       |              |
| <b>HER2</b>                                                                 | 1.181               | 0.456        | —                     |              |
| positive versus negative                                                    | (0.763-1.828)       |              |                       |              |
| <b>Ki-67</b>                                                                | 1.508               | 0.189        | —                     |              |
| positive versus negative                                                    | (0.817-2.784)       |              |                       |              |
| <b>Subtype</b>                                                              |                     | 0.179        |                       | 0.634        |
| ER <sup>+</sup> /HER <sup>+</sup> versus ER <sup>+</sup> /HER2 <sup>-</sup> | 1.745               | <b>0.047</b> | 1.48                  | 0.202        |
|                                                                             | (1.008-3.020)       |              | (0.811-2.703)         |              |
| ER <sup>-</sup> /HER <sup>+</sup> versus ER <sup>+</sup> /HER2 <sup>-</sup> | 1.451               | 0.253        | 1.229                 | 0.549        |
|                                                                             | (0.766-2.749)       |              | (0.626-2.414)         |              |
| ER <sup>-</sup> /HER <sup>-</sup> versus ER <sup>+</sup> /HER2 <sup>-</sup> | 1.51                | 0.192        | 1.264                 | 0.524        |
|                                                                             | (0.813-2.805)       |              | (0.615-2.597)         |              |
| <b>Grade</b>                                                                | 1.65                | <b>0.016</b> | 1.472                 | 0.119        |
| G3 versus G1+G2                                                             | (1.104-2.610)       |              | (0.905-2.393)         |              |
| <b>LacRNA expression level</b>                                              | 0.483               | <b>0.001</b> | 0.483                 | <b>0.006</b> |
| high versus low                                                             | (0.312-0.749)       |              | (0.287-0.811)         |              |
| <b>OS</b>                                                                   |                     |              |                       |              |
| <b>Age</b>                                                                  | 1.413               | 0.261        | —                     |              |
| ≤50 versus >50 years                                                        | (0.773-2.584)       |              |                       |              |
| <b>T stage</b>                                                              | 2.562               | <b>0.013</b> | 1.787                 | 0.211        |
| T2/3 versus T1                                                              | (1.191-5.512)       |              | (0.720-4.435)         |              |
| <b>pN stage</b>                                                             |                     | <b>0.000</b> |                       | <b>0.000</b> |
| N1 versus N0                                                                | 3.972               | <b>0.003</b> | 3.847                 | <b>0.008</b> |
|                                                                             | (1.584-9.958)       |              | (1.422-10.411)        |              |



|                                                                             |                          |              |                         |              |
|-----------------------------------------------------------------------------|--------------------------|--------------|-------------------------|--------------|
| N2 versus N0                                                                | 6.424<br>(2.252-18.324)  | <b>0.001</b> | 8.983<br>(2.916-27.675) | <b>0.000</b> |
| N3 versus N0                                                                | 12.173<br>(5.081-29.164) | <b>0.000</b> | 8.447<br>(3.095-23.051) | <b>0.000</b> |
| <b>ER</b><br>positive versus negative                                       | 0.561<br>(0.306-1.026)   | 0.061        | —                       |              |
| <b>HER2</b><br>positive versus negative                                     | 1.606<br>(0.878-2.937)   | 0.124        | —                       |              |
| <b>Ki-67</b><br>positive versus negative                                    | 1.586<br>(0.657-3.832)   | 0.305        | —                       |              |
| <b>Subtype</b>                                                              |                          | 0.066        |                         | 0.154        |
| ER <sup>+</sup> /HER <sup>+</sup> versus ER <sup>+</sup> /HER2 <sup>-</sup> | 2.355<br>(1.087-5.104)   | <b>0.030</b> | 2.369<br>(.011-5.547)   | <b>0.047</b> |
| ER <sup>-</sup> /HER <sup>+</sup> versus ER <sup>+</sup> /HER2 <sup>-</sup> | 1.904<br>(0.755-4.802)   | 0.172        | 1.737<br>(0.645-4.674)  | 0.274        |
| ER <sup>-</sup> /HER <sup>-</sup> versus ER <sup>+</sup> /HER2 <sup>-</sup> | 2.488<br>(1.080-5.733)   | <b>0.032</b> | 2.569<br>(0.953-6.930)  | 0.062        |
| <b>Grade</b><br>G3 versus G1+G2                                             | 3.124<br>(1.817-6.502)   | <b>0.000</b> | 1.878<br>(0.908-3.881)  | 0.089        |
| <b>LacRNA expression level</b><br>high versus low                           | 0.338<br>(0.171-0.667)   | <b>0.002</b> | 0.318<br>(0.135-0.750)  | <b>0.009</b> |

Abbreviations: CI, confidence interval; HR, hazard ratio; DFS, disease-free survival; OS, overall survival;

BC, breast cancer.
